# Supplementary material for: Age of the oldest Homo sapiens from eastern Africa
Source: Research Square preprint supplement (doi:10.21203/rs.3.rs-373661/v1), 2021-04-03
Supplement: Supplementary file 2 [file 8fa343eed54837aeeb3cd6e1.xlsx]

## Sheet: Table S1
Table S1. Average normalised major and trace element composition of samples analysed for this study
Key: Avg = average; SD = standard deviation; n = number of analyses; FeO* = FeO total;
Volcano/formation	Shala		Shala		Shala		Shala		Corbetti		Kibish		Kibish		Gademotta		Konso
Unit	Qi2	211 ka	Qi2	211 ka	Qi2	211 ka	Qi2	211 ka	Caldera	177 ka	KHS		ETH18-8		Unit D		TA-56
Sample ID	ETH17-14A1		ETH17-14B1		ETH17-14B5		ETH17-14C		COI2E		ETH18-1		ETH18-8		ETH17-20		ETH18-14A
(wt%)	Avg (n=10)	SD	Avg (n=7)	SD	Avg (n=38)	SD	Avg (n=43)	SD	Avg (n=41)	SD	Avg (n=43)	SD	Avg (n=37)	SD	Avg (n=31)	SD	Avg (n=36)	SD
SiO2	74.9353	0.250489	75.1061	0.280643	74.9029	0.256475	74.6962	0.158994	74.3389	0.186811	77.0308	0.327848	74.712	0.27012	75.9194	0.277448	76.1133	1.05304
TiO2	0.322197	0.0100978	0.323562	0.0116805	0.328902	0.00825886	0.328952	0.0101839	0.346634	0.00998575	0.337443	0.0131527	0.350465	0.0121005	0.337366	0.0348701	0.353487	0.0124074
Al2O3	9.75854	0.170122	9.74835	0.104436	9.72808	0.106265	9.66238	0.10025	9.04934	0.114918	9.91171	0.188628	9.28351	0.242117	9.93202	0.306356	9.28855	0.309249
FeO*	4.99401	0.0999903	4.97347	0.0956404	4.99545	0.111255	4.86992	0.103599	5.62009	0.146521	5.10938	0.127583	5.53037	0.361382	5.61677	0.226954	5.694	0.401941
MnO	0.26177	0.0205858	0.266259	0.0219483	0.256409	0.0292653	0.238827	0.021381	0.292789	0.0343862	0.276696	0.0264459	0.291714	0.0282732	0.218081	0.0276612	0.301483	0.0307296
MgO	0.036622	0.0288345	0.0960145	0.0918827	0.0733589	0.120892	0.0164682	0.00527461	0.0282212	0.00556504	0.0197081	0.00729262	0.030052	0.00558784	0.00832154	0.00545744	0.032526	0.0106796
CaO	0.225648	0.0294954	0.221405	0.0105793	0.208772	0.0213453	0.215579	0.0149282	0.193172	0.025637	0.218396	0.0160085	0.212474	0.0166735	0.268098	0.0224541	0.232709	0.0160988
Na2O	4.61396	0.330124	4.10898	0.54281	4.61454	0.227082	5.23119	0.125928	5.05159	0.244137	2.49705	0.245229	5.00754	0.188844	3.09111	0.259055	3.52958	1.04903
K2O	4.83804	0.142938	5.13485	0.283693	4.87848	0.184229	4.72484	0.0816095	5.06229	0.175145	4.57401	0.155206	4.56643	0.137541	4.59301	0.111364	4.43615	0.374326
P2O5	0.0145111	0.0115452	0.0209818	0.00997794	0.0131361	0.010925	0.0156121	0.0143644	0.0169462	0.010343	n.d	n.d	0.0154397	0.0127592	0.0158062	0.013066	0.0181983	0.0159598
Cl	n.a	n.a	n.a	n.a	0.194219	0.00317012	0.151486	0.0111172	0.203078	0.0141586	0.156402	0.00714059	0.201073	0.0207437	0.146784	0.0161763	0.203011	0.0272396
Na2O+K2O	9.452	0.217724	9.24383	0.301579	9.49302	0.207682	9.95603	0.113451	10.1139	0.145273	7.07106	0.366297	9.57397	0.171381	7.68412	0.228223	7.96573	1.22914
(ppm)					Avg (n=22)	SD	Avg (n=17)	SD	Avg (n=21)	SD	Avg (n=18)	SD	Avg (n=17)	SD	Avg (n=36)	SD	Avg (n=10)	SD
Rb					110.215	11.4521	87.0109	6.28532	114.944	14.2529	115.933	15.3612	111.312	11.4114	118.719	10.1654	118.227	24.3994
Sr					7.33582	9.25201	0.77654	0.209816	1.31365	0.28276	1.01267	0.401768	1.60642	0.157789	2.16092	2.05945	2.8808	1.14466
Y					101.227	13.7495	90.9673	19.1303	139.93	2.99716	112.487	13.7987	141.95	14.7836	93.3605	10.264	163.993	31.038
Zr					961.006	108.046	799.568	147.077	1224.51	25.027	1065.87	139.437	1237.92	132.975	853.622	88.339	1428.07	264.056
Nb					147.996	8.64696	122.469	15.971	174.465	6.00081	167.133	22.6704	181.322	17.6214	119.861	7.69953	202.271	38.6885
Cs					1.03698	0.234454	0.877953	0.123735	1.45962	0.347465	1.05333	0.161551	1.27129	0.149187	1.16077	0.128266	1.36897	0.288275
Ba					12.8227	4.21548	13.8647	5.09857	27.1119	2.00107	14.0113	2.22999	33.5113	7.36112	119.068	184.052	41.5737	14.9162
La					121.26	13.4617	103.098	12.9747	139.461	2.97812	129.34	17.0167	142.345	15.0536	101.582	5.8229	160.03	31.3732
Ce					258.697	25.6395	219.106	26.1273	294.968	9.6109	277.133	41.4539	301.336	31.2711	211.539	13.7961	336.752	64.4152
Pr					27.9581	3.12943	25.2143	3.51621	34.9197	0.634222	31.5933	3.9285	35.212	3.70824	23.5543	1.60659	39.7542	7.18092
Nd					108.678	12.2273	95.6036	13.3093	132.952	3.52819	121.92	15.7339	137.482	14.2573	94.4513	7.90405	151.297	27.8756
Sm					21.8377	3.15517	18.6039	2.97506	28.5521	0.780202	25.2	3.3092	28.3593	2.99535	19.2291	1.98332	31.9767	5.55774
Eu					2.50964	0.34596	2.56738	0.544395	3.99077	0.145021	2.88667	0.655463	4.13475	0.326171	2.72731	0.843263	4.56316	0.83181
Gd					18.5339	2.1336	17.0709	3.06729	25.8383	0.705856	21.2933	2.69721	25.8278	2.5969	17.1423	2.1642	29.3639	5.46201
Dy					19.545	3.20033	17.0344	3.38674	26.4258	0.609997	21.6	2.70967	26.7565	2.82854	17.7421	2.1101	29.8243	5.3372
Er					11.343	1.65481	10.1525	1.98471	15.8691	0.334355	12.3173	1.54491	15.6143	1.62648	10.2239	1.21649	17.7357	3.18075
Yb					11.0166	1.45992	9.9113	2.12876	14.8557	0.484161	12.1127	1.65885	15.1463	1.54926	9.88204	1.07199	16.7582	2.85758
Hf					23.0634	3.07852	20.4958	3.55089	30.286	0.770585	24.9133	3.63212	30.5945	3.24364	20.6593	2.41497	34.3584	6.13043
Ta					9.30414	0.982347	7.41536	0.917716	10.2961	0.31194	10.3813	1.53243	10.4366	1.09509	7.29175	0.54009	11.4327	2.1323
Pb					17.2525	4.78426	14.1816	1.77397	21.4991	4.19742	18.24	3.22939	19.5968	2.18425	18.9087	2.18388	19.7746	3.60832
Th					17.1399	2.08467	13.0792	0.859767	16.0608	0.580508	18.7153	3.07615	15.9179	1.93109	16.146	1.36593	17.4726	3.03519
U					4.75323	0.442406	3.71928	0.279676	4.64554	0.220198	4.98667	0.976406	4.58565	0.528438	3.90431	0.284821	4.98664	0.943668
La/Th					7.08982	0.270015	7.873	0.734276	8.6894	0.216788	6.96215	0.437227	8.9649	0.216967	6.31648	0.427627	9.13249	0.344935
Zr/Rb					8.75874	0.960028	9.14532	1.22758	10.7917	1.19953	9.26326	1.17071	11.1164	0.226806	7.26926	1.22493	12.127	0.352606
Zr/Y					9.53654	0.463842	8.83766	0.309547	8.75183	0.120224	9.48765	0.622124	8.71732	0.0732997	9.15162	0.261743	8.71478	0.140146
Nb/Th					8.73134	0.940651	9.35917	0.988811	10.8671	0.286776	9.0289	1.05231	11.4358	0.423313	7.45987	0.65602	11.5554	0.58164

## Sheet: Table S2
Table S2. Single crystal 40Ar/39Ar ages for unit A and unit C of the Qi2 ignimbrite of Shala
sample	material	single grain population age (Ma)	± 2s w/o J (Ma)	± 2s w/J (Ma)	MSWD	p	n/n-total
ETH17-14C	Sanidine	0.192	0.026	0.026	0.98	0.51	37/45
ETH17-14A1	Sanidine	0.225	0.021	0.021	0.78	0.87	51/68
composite	Sanidine	0.210783	0.016	0.016	0.9	0.75	88/113
MSWD : mean square weighted deviates
J : Irradiation parameter
p : probability that residuals are explained by measurement errors exclusively
n/n-tot : number of accepted grains/total number of grains analysed
composite : combined analyses from both samples

## Sheet: Table S3
Table S3. 40Ar/39Ar raw data for the Qi2 samples
Run_ID	Sample	Run_Date	Run_Hour	Pwr_AchievedMax	Ar40_	Ar40_Er	Ar39_	Ar39_Er	Ar38_	Ar38_Er	Ar37_	Ar37_Er	Ar36_	Ar36_Er	Ar40_Disc	Ar40_DiscEr	Ar39_Disc	Ar39_DiscEr	Ar38_Disc	Ar38_DiscEr	Ar37_Disc	Ar37_DiscEr	Ar36_Disc	Ar36_DiscEr	Ar40_Bkgd	Ar40_BkgdEr	Ar39_Bkgd	Ar39_BkgdEr	Ar38_Bkgd	Ar38_BkgdEr	Ar37_Bkgd	Ar37_BkgdEr	Ar36_Bkgd	Ar36_BkgdEr	Ar36_Over_Ar39	Ar36_Over_Ar39_Er	PctAr36Ca	Ar37_Over_Ar39	Ar37_Over_Ar39_Er	Ca_Over_K	Ca_Over_K_Er	Cl_Over_K	Cl_Over_K_Er	Ar38_Over_Ar39	Ar38_Over_Ar39_Er	Ar40_Over_Ar39	Ar40_Over_Ar39_Er	Ar40Rad_Over_Ar39	Ar40Rad_Over_Ar39_Er
94241-01	ETH17-14A1	2016-01-16	14.0333	10	0.0249976	0.001705	0.0968284	0.0005501	0.001352	0.0001903	0.0001146	6.24e-05	0.0001083	2.11e-05	1.0186	0.0004019	1.0186	0.0004019	1.0186	0.0004019	1.0186	0.0004019	1.0186	0.0004019	0.011917	0.00013	0.0003319	1.1e-05	0.0001108	1.1e-05	0.0002038	6.9e-06	9.2e-05	1.8e-06	0.0011179	0.0002176	0.198027	0.0085777	0.0047555	0.0163733	0.0093209	0.0044742	0.0059152	0.0139532	0.0020396	0.257982	0.0190056	-0.0757685	0.0676557
94241-02	ETH17-14A1	2016-01-16	14.8667	10	0.0473441	0.001705	0.174588	0.0007401	0.0020928	0.0002403	9.09e-05	6.34e-05	2.54e-05	3.5e-05	1.0186	0.0004019	1.0186	0.0004019	1.0186	0.0004019	1.0186	0.0004019	1.0186	0.0004019	0.011917	0.00013	0.0003319	1.1e-05	0.0001108	1.1e-05	0.0002038	6.9e-06	9.2e-05	1.8e-06	0.0001455	0.0002006	0.646733	0.0037749	0.0026812	0.0069597	0.0052552	-0.0007217	0.0041423	0.0119784	0.0014278	0.270985	0.0105759	0.227084	0.0608154
94241-03	ETH17-14A1	2016-01-16	17	10	0.0392494	0.0018047	0.132473	0.0006801	0.0013655	0.0001604	0.0001753	8.63e-05	2.97e-05	3.21e-05	1.0186	0.0004019	1.0186	0.0004019	1.0186	0.0004019	1.0186	0.0004019	1.0186	0.0004019	0.011917	0.00013	0.0003319	1.1e-05	0.0001108	1.1e-05	0.0002038	6.9e-06	9.2e-05	1.8e-06	0.0002242	0.0002418	1.10992	0.0096139	0.0048191	0.0184043	0.0094455	-0.0056301	0.0036479	0.0103006	0.0012565	0.296073	0.0147434	0.229058	0.0736702
94241-04	ETH17-14A1	2016-01-16	18.4667	10	0.0741146	0.002104	0.11136	0.0005501	0.0007804	0.0002702	6.82e-05	3.86e-05	0.0001883	3.6e-05	1.0186	0.0004019	1.0186	0.0004019	1.0186	0.0004019	1.0186	0.0004019	1.0186	0.0004019	0.011917	0.00013	0.0003319	1.1e-05	0.0001108	1.1e-05	0.0002038	6.9e-06	9.2e-05	1.8e-06	0.0016899	0.0003236	0.0663067	0.0044523	0.0025693	0.0082876	0.0050359	-0.0159961	0.0073014	0.0070027	0.0025162	0.665068	0.0206213	0.159865	0.0986959
94241-05	ETH17-14A1	2016-01-16	19.3333	10	0.0245778	0.0018047	0.0769417	0.0004601	0.0004162	0.0002103	0.0001344	4.75e-05	6.96e-05	3.01e-05	1.0186	0.0004019	1.0186	0.0004019	1.0186	0.0004019	1.0186	0.0004019	1.0186	0.0004019	0.011917	0.00013	0.0003319	1.1e-05	0.0001108	1.1e-05	0.0002038	6.9e-06	9.2e-05	1.8e-06	0.0009042	0.0003904	0.365973	0.0127113	0.0045777	0.0244753	0.0089724	-0.0201968	0.0082249	0.0054059	0.0028339	0.319209	0.025313	0.0491635	0.119244
94241-06	ETH17-14A1	2016-01-16	21.4667	10	0.02982	0.0020042	0.0584247	0.0004401	0.0003125	0.0002802	0.0001584	9.03e-05	2.95e-05	3.3e-05	1.0186	0.0004019	1.0186	0.0004019	1.0186	0.0004019	1.0186	0.0004019	1.0186	0.0004019	0.011917	0.00013	0.0003319	1.1e-05	0.0001108	1.1e-05	0.0002038	6.9e-06	9.2e-05	1.8e-06	0.0005049	0.0005653	1.02582	0.0197692	0.0114746	0.0383091	0.0224905	-0.0201551	0.0144287	0.0053447	0.004973	0.510039	0.0371264	0.35977	0.172789
94241-07	ETH17-14A1	2016-01-16	22.9167	10	0.0487972	0.0020042	0.0906176	0.0003202	0.0009713	0.0001803	0.0001339	4.95e-05	0.0001305	3.11e-05	1.0186	0.0004019	1.0186	0.0004019	1.0186	0.0004019	1.0186	0.0004019	1.0186	0.0004019	0.011917	0.00013	0.0003319	1.1e-05	0.0001108	1.1e-05	0.0002038	6.9e-06	9.2e-05	1.8e-06	0.0014393	0.0003425	0.194422	0.0107838	0.0040604	0.0206974	0.0079584	-0.0051048	0.0059884	0.0107108	0.0020637	0.538115	0.0238785	0.108411	0.104976
94241-08	ETH17-14A1	2016-01-16	23.75	10	0.0552988	0.001705	0.210595	0.0007401	0.0025565	0.0001803	0.0002834	0.0001202	2.84e-05	1.91e-05	1.0186	0.0004019	1.0186	0.0004019	1.0186	0.0004019	1.0186	0.0004019	1.0186	0.0004019	0.011917	0.00013	0.0003319	1.1e-05	0.0001108	1.1e-05	0.0002038	6.9e-06	9.2e-05	1.8e-06	0.0001349	9.06e-05	1.88762	0.0098299	0.0042468	0.0188277	0.0083238	-0.0002731	0.0025787	0.0121309	0.000889	0.262398	0.0087642	0.222162	0.0284215
94241-09	ETH17-14A1	2016-01-17	1.91667	10	0.0752233	0.0018047	0.150589	0.0006901	0.0014838	0.0001305	0.0001703	0.0001202	0.0001569	3.9e-05	1.0186	0.0004019	1.0186	0.0004019	1.0186	0.0004019	1.0186	0.0004019	1.0186	0.0004019	0.011917	0.00013	0.0003319	1.1e-05	0.0001108	1.1e-05	0.0002038	6.9e-06	9.2e-05	1.8e-06	0.0010413	0.0002591	0.204949	0.0082773	0.0059496	0.0157846	0.0116613	-0.0073949	0.0026148	0.0098462	0.0008995	0.499172	0.0131182	0.188062	0.078428
94241-10	ETH17-14A1	2016-01-17	3.4	10	0.0540824	0.001406	0.0854594	0.0004901	0.0011456	0.0001305	0.0001586	5.94e-05	0.0001675	3.21e-05	1.0186	0.0004019	1.0186	0.0004019	1.0186	0.0004019	1.0186	0.0004019	1.0186	0.0004019	0.011917	0.00013	0.0003319	1.1e-05	0.0001108	1.1e-05	0.0002038	6.9e-06	9.2e-05	1.8e-06	0.0019588	0.000375	0.180945	0.0135992	0.005188	0.0262156	0.0101686	0.0023969	0.0046	0.0133953	0.0015849	0.632394	0.0181109	0.0479336	0.113293
94241-11	ETH17-14A1	2016-01-17	4.23333	10	0.0283991	0.0015056	0.101288	0.0005501	0.0013105	0.0001704	0.0001125	6.14e-05	3.24e-05	2.11e-05	1.0186	0.0004019	1.0186	0.0004019	1.0186	0.0004019	1.0186	0.0004019	1.0186	0.0004019	0.011917	0.00013	0.0003319	1.1e-05	0.0001108	1.1e-05	0.0002038	6.9e-06	9.2e-05	1.8e-06	0.0003199	0.000208	0.656012	0.0081419	0.0045265	0.0155193	0.0088719	0.0019413	0.0050626	0.0129294	0.0017454	0.280181	0.0160719	0.184617	0.0641222
94241-12	ETH17-14A1	2016-01-17	6.4	10	0.0481298	0.001705	0.185642	0.0008001	0.002515	0.0002103	0.0001323	4.26e-05	6.65e-05	1.91e-05	1.0186	0.0004019	1.0186	0.0004019	1.0186	0.0004019	1.0186	0.0004019	1.0186	0.0004019	0.011917	0.00013	0.0003319	1.1e-05	0.0001108	1.1e-05	0.0002038	6.9e-06	9.2e-05	1.8e-06	0.0003581	0.0001027	0.37094	0.0052362	0.0017155	0.0098239	0.0033623	0.0036852	0.0034104	0.013538	0.0011761	0.259078	0.0099506	0.151903	0.0322337
94241-13	ETH17-14A1	2016-01-17	7.86667	10	0.0412838	0.0015056	0.0631168	0.0004801	0.0002865	0.0001604	0.0001289	7.03e-05	0.0001049	2.41e-05	1.0186	0.0004019	1.0186	0.0004019	1.0186	0.0004019	1.0186	0.0004019	1.0186	0.0004019	0.011917	0.00013	0.0003319	1.1e-05	0.0001108	1.1e-05	0.0002038	6.9e-06	9.2e-05	1.8e-06	0.0016611	0.0003813	0.235976	0.015016	0.0083485	0.0289926	0.0163632	-0.0231311	0.0076509	0.0045367	0.0026348	0.653621	0.0261954	0.157718	0.11664
94241-14	ETH17-14A1	2016-01-17	8.71667	10	0.0427047	0.0020042	0.112603	0.0006201	0.0015346	0.0001305	0.0003432	7.93e-05	9.95e-05	3.6e-05	1.0186	0.0004019	1.0186	0.0004019	1.0186	0.0004019	1.0186	0.0004019	1.0186	0.0004019	0.011917	0.00013	0.0003319	1.1e-05	0.0001108	1.1e-05	0.0002038	6.9e-06	9.2e-05	1.8e-06	0.0008832	0.0003199	0.666246	0.0224284	0.0052805	0.0435214	0.01035	0.0036344	0.0034944	0.0136188	0.0012039	0.37898	0.0192745	0.116388	0.0974125
94241-15	ETH17-14A1	2016-01-17	10.8833	10	0.0638132	0.002104	0.194724	0.0007801	0.0021612	0.0001704	8.78e-05	6.04e-05	7.02e-05	3.21e-05	1.0186	0.0004019	1.0186	0.0004019	1.0186	0.0004019	1.0186	0.0004019	1.0186	0.0004019	0.011917	0.00013	0.0003319	1.1e-05	0.0001108	1.1e-05	0.0002038	6.9e-06	9.2e-05	1.8e-06	0.0003604	0.0001645	0.228061	0.0033253	0.0023291	0.0060785	0.004565	-0.0034126	0.0026364	0.0110911	0.0009083	0.327478	0.0117068	0.219347	0.0504748
94241-16	ETH17-14A1	2016-01-17	12.35	10	0.113824	0.0022038	0.129029	0.0003602	0.0017566	0.0001803	0.0001616	7.53e-05	0.0003573	3.5e-05	1.0186	0.0004019	1.0186	0.0004019	1.0186	0.0004019	1.0186	0.0004019	1.0186	0.0004019	0.011917	0.00013	0.0003319	1.1e-05	0.0001108	1.1e-05	0.0002038	6.9e-06	9.2e-05	1.8e-06	0.0027673	0.0002715	0.0863652	0.0092429	0.0043886	0.0176772	0.0086018	0.0025612	0.0042065	0.0136046	0.0014497	0.881529	0.0185604	0.0553417	0.0831074
94241-17	ETH17-14A1	2016-01-17	13.2	10	0.0517358	0.0016053	0.16005	0.0004002	0.0018759	0.0001903	0.0001166	5.15e-05	5.98e-05	3.5e-05	1.0186	0.0004019	1.0186	0.0004019	1.0186	0.0004019	1.0186	0.0004019	1.0186	0.0004019	0.011917	0.00013	0.0003319	1.1e-05	0.0001108	1.1e-05	0.0002038	6.9e-06	9.2e-05	1.8e-06	0.0003735	0.0002188	0.365759	0.005379	0.0024193	0.0101039	0.0047418	-0.0016171	0.0035788	0.0117126	0.0012333	0.323018	0.0108241	0.211159	0.06622
94241-18	ETH17-14A1	2016-01-17	15.3833	10	0.0330169	0.001406	0.104785	0.0003402	0.0016913	0.0001305	0.000156	8.83e-05	0.0001095	2.11e-05	1.0186	0.0004019	1.0186	0.0004019	1.0186	0.0004019	1.0186	0.0004019	1.0186	0.0004019	0.011917	0.00013	0.0003319	1.1e-05	0.0001108	1.1e-05	0.0002038	6.9e-06	9.2e-05	1.8e-06	0.0010444	0.000201	0.273778	0.0110144	0.0063493	0.0211493	0.0124448	0.0108243	0.0037476	0.0161289	0.0012921	0.314868	0.0144755	0.0033492	0.0617291
94241-19	ETH17-14A1	2016-01-17	16.8167	10	0.0272904	0.0013065	0.0286496	0.0003202	-4.86e-05	0.0002303	9.81e-05	5.05e-05	5.21e-05	3.3e-05	1.0186	0.0004019	1.0186	0.0004019	1.0186	0.0004019	1.0186	0.0004019	1.0186	0.0004019	0.011917	0.00013	0.0003319	1.1e-05	0.0001108	1.1e-05	0.0002038	6.9e-06	9.2e-05	1.8e-06	0.0018179	0.0011529	0.366586	0.0253721	0.0132977	0.0492912	0.026064	-0.0412844	0.0241839	-0.0016935	0.0083331	0.951877	0.0503297	0.409673	0.347693
94241-20	ETH17-14A1	2016-01-17	19.6667	10	0.0928442	0.0016053	0.128446	0.0003502	0.0018708	0.0001704	0.000201	0.0001002	0.0002626	2.41e-05	1.0186	0.0004019	1.0186	0.0004019	1.0186	0.0004019	1.0186	0.0004019	1.0186	0.0004019	0.011917	0.00013	0.0003319	1.1e-05	0.0001108	1.1e-05	0.0002038	6.9e-06	9.2e-05	1.8e-06	0.0020431	0.0001873	0.147809	0.01162	0.0059028	0.0223363	0.0115696	0.0057111	0.0039906	0.014554	0.0013758	0.722308	0.0136074	0.112583	0.05751
94241-21	ETH17-14A1	2016-01-17	22.55	10	0.140928	0.0022038	0.14683	0.0003602	0.0013697	0.0001305	8.11e-05	7.23e-05	0.0002402	3.7e-05	1.0186	0.0004019	1.0186	0.0004019	1.0186	0.0004019	1.0186	0.0004019	1.0186	0.0004019	0.011917	0.00013	0.0003319	1.1e-05	0.0001108	1.1e-05	0.0002038	6.9e-06	9.2e-05	1.8e-06	0.0016349	0.0002521	0.0630179	0.0041118	0.0037349	0.0076201	0.0073204	-0.0092415	0.002677	0.0093215	0.0009216	0.959114	0.0163411	0.470427	0.0770009
94241-22	ETH17-14A1	2016-01-18	1.41667	10	0.0197878	0.0015056	0.0198593	0.0001504	0.0001921	0.0001205	0.0002522	6.54e-05	4.31e-05	3.5e-05	1.0186	0.0004019	1.0186	0.0004019	1.0186	0.0004019	1.0186	0.0004019	1.0186	0.0004019	0.011917	0.00013	0.0003319	1.1e-05	0.0001108	1.1e-05	0.0002038	6.9e-06	9.2e-05	1.8e-06	0.0021697	0.0017636	1.15465	0.0947625	0.0250256	0.185308	0.049054	-0.0085192	0.0182741	0.009668	0.0062917	0.995686	0.0819467	0.354519	0.532844
94241-23	ETH17-14A1	2016-01-18	4.35	10	0.0843298	0.0018047	0.0908321	0.0003002	0.0016166	0.0002103	0.0001194	4.16e-05	4.72e-05	3.3e-05	1.0186	0.0004019	1.0186	0.0004019	1.0186	0.0004019	1.0186	0.0004019	1.0186	0.0004019	0.011917	0.00013	0.0003319	1.1e-05	0.0001108	1.1e-05	0.0002038	6.9e-06	9.2e-05	1.8e-06	0.0005195	0.0003636	0.490129	0.0098321	0.0034873	0.0188321	0.0068351	0.015913	0.0069655	0.0177846	0.0024012	0.927747	0.0216207	0.77296	0.110676
94241-24	ETH17-14A1	2016-01-18	7.2	10	0.0335336	0.001406	0.0793649	0.0003202	0.0008074	0.0001704	0.0002522	5.94e-05	8.25e-05	3.11e-05	1.0186	0.0004019	1.0186	0.0004019	1.0186	0.0004019	1.0186	0.0004019	1.0186	0.0004019	0.011917	0.00013	0.0003319	1.1e-05	0.0001108	1.1e-05	0.0002038	6.9e-06	9.2e-05	1.8e-06	0.001039	0.000391	0.601966	0.0238258	0.0057164	0.0462603	0.0112044	-0.0064662	0.0064596	0.0101654	0.0022259	0.422221	0.0191434	0.113042	0.118285
94241-25	ETH17-14A1	2016-01-18	10.0667	10	0.0352128	0.001705	0.0975966	0.0005201	0.0015491	0.0002103	0.0001873	5.64e-05	2.79e-05	3.11e-05	1.0186	0.0004019	1.0186	0.0004019	1.0186	0.0004019	1.0186	0.0004019	1.0186	0.0004019	0.011917	0.00013	0.0003319	1.1e-05	0.0001108	1.1e-05	0.0002038	6.9e-06	9.2e-05	1.8e-06	0.0002859	0.0003179	1.31644	0.0144251	0.0044259	0.0278345	0.008675	0.010464	0.0064845	0.0158615	0.0022358	0.36054	0.0189026	0.275769	0.0967842
94241-26	ETH17-14A1	2016-01-18	12.9167	10	0.0455895	0.001705	0.129459	0.0007101	0.0012524	0.0002502	0.0001247	4.95e-05	3.97e-05	1.71e-05	1.0186	0.0004019	1.0186	0.0004019	1.0186	0.0004019	1.0186	0.0004019	1.0186	0.0004019	0.011917	0.00013	0.0003319	1.1e-05	0.0001108	1.1e-05	0.0002038	6.9e-06	9.2e-05	1.8e-06	0.0003066	0.000132	0.607774	0.0072557	0.0029329	0.0137822	0.0057486	-0.0075118	0.0058164	0.0096673	0.0020049	0.351901	0.0143142	0.260061	0.0418968
94241-27	ETH17-14A1	2016-01-18	15.75	10	0.0215854	0.0016053	0.0568891	0.0002602	0.0020679	0.0002802	0.00026	0.0001102	6.14e-05	3.11e-05	1.0186	0.0004019	1.0186	0.0004019	1.0186	0.0004019	1.0186	0.0004019	1.0186	0.0004019	0.011917	0.00013	0.0003319	1.1e-05	0.0001108	1.1e-05	0.0002038	6.9e-06	9.2e-05	1.8e-06	0.0010789	0.0005455	0.841958	0.0345017	0.0149	0.0671859	0.0292049	0.0693743	0.014819	0.0363229	0.00511	0.379156	0.0304105	0.0602408	0.165667
94241-28	ETH17-14A1	2016-01-18	18.55	10	0.0322957	0.0018047	0.0934741	0.0003002	0.0016062	0.0002103	0.0001792	3.47e-05	8.68e-05	3.5e-05	1.0186	0.0004019	1.0186	0.0004019	1.0186	0.0004019	1.0186	0.0004019	1.0186	0.0004019	0.011917	0.00013	0.0003319	1.1e-05	0.0001108	1.1e-05	0.0002038	6.9e-06	9.2e-05	1.8e-06	0.0009281	0.0003747	0.407818	0.0145075	0.0028613	0.027996	0.0056083	0.0139105	0.0067689	0.017171	0.0023332	0.345255	0.0208026	0.0687923	0.113776
94241-29	ETH17-14A1	2016-01-18	21.4	10	0.0369566	0.0016053	0.0497093	0.0004201	0.0007596	0.0001205	0.0001496	6.54e-05	8.51e-05	3.01e-05	1.0186	0.0004019	1.0186	0.0004019	1.0186	0.0004019	1.0186	0.0004019	1.0186	0.0004019	0.011917	0.00013	0.0003319	1.1e-05	0.0001108	1.1e-05	0.0002038	6.9e-06	9.2e-05	1.8e-06	0.0017111	0.0006044	0.349966	0.0228215	0.0101617	0.0442917	0.0199173	0.0079715	0.0073038	0.0152704	0.0025171	0.742918	0.0353685	0.233247	0.183717
94241-30	ETH17-14A1	2016-01-19	0.216667	10	0.0432321	0.0015056	0.0919206	0.0005001	0.0011725	0.0001305	0.0001862	7.13e-05	8.33e-05	2.21e-05	1.0186	0.0004019	1.0186	0.0004019	1.0186	0.0004019	1.0186	0.0004019	1.0186	0.0004019	0.011917	0.00013	0.0003319	1.1e-05	0.0001108	1.1e-05	0.0002038	6.9e-06	9.2e-05	1.8e-06	0.0009058	0.00024	0.444093	0.0154032	0.0060106	0.0297516	0.0117809	0.0010922	0.0042746	0.0127468	0.0014734	0.46998	0.0178272	0.200043	0.0737938
94241-31	ETH17-14A1	2016-01-19	3.08333	10	0.0800994	0.0020042	0.072629	0.0002702	0.0007378	0.0001305	0.0002773	0.0001102	0.000155	3.8e-05	1.0186	0.0004019	1.0186	0.0004019	1.0186	0.0004019	1.0186	0.0004019	1.0186	0.0004019	0.011917	0.00013	0.0003319	1.1e-05	0.0001108	1.1e-05	0.0002038	6.9e-06	9.2e-05	1.8e-06	0.0021329	0.0005235	0.358724	0.0290961	0.0117807	0.0565904	0.0230907	-0.0071033	0.0054108	0.0101517	0.0018629	1.10206	0.0300032	0.466711	0.159091
94241-32	ETH17-14A1	2016-01-19	5.95	10	0.0299599	0.0018047	0.0897901	0.0005401	0.0010159	0.0002003	0.0001416	8.83e-05	3.24e-05	3.11e-05	1.0186	0.0004019	1.0186	0.0004019	1.0186	0.0004019	1.0186	0.0004019	1.0186	0.0004019	0.011917	0.00013	0.0003319	1.1e-05	0.0001108	1.1e-05	0.0002038	6.9e-06	9.2e-05	1.8e-06	0.0003608	0.0003456	0.868441	0.012048	0.0076497	0.0231752	0.0149936	-0.0027893	0.0067141	0.0113058	0.002314	0.333424	0.0217253	0.225862	0.105434
94241-33	ETH17-14A1	2016-01-19	8.81667	10	0.0177964	0.0015056	0.0585008	0.0002702	0.0012804	0.0002403	6.25e-05	6.93e-05	0.0001041	3.21e-05	1.0186	0.0004019	1.0186	0.0004019	1.0186	0.0004019	1.0186	0.0004019	1.0186	0.0004019	0.011917	0.00013	0.0003319	1.1e-05	0.0001108	1.1e-05	0.0002038	6.9e-06	9.2e-05	1.8e-06	0.0017785	0.0005475	0.118495	0.0081767	0.0092453	0.0155873	0.018121	0.0270772	0.0123541	0.0218716	0.0042593	0.303988	0.0277261	-0.226633	0.165794
94241-34	ETH17-14A1	2016-01-19	11.1	10	0.0780435	0.001705	0.0813623	0.0005001	0.0008883	0.0001105	5.33e-05	4.45e-05	0.0002516	3.4e-05	1.0186	0.0004019	1.0186	0.0004019	1.0186	0.0004019	1.0186	0.0004019	1.0186	0.0004019	0.011917	0.00013	0.0003319	1.1e-05	0.0001108	1.1e-05	0.0002038	6.9e-06	9.2e-05	1.8e-06	0.0030903	0.0004186	0.0411762	0.0050258	0.0042776	0.0094116	0.0083842	-0.0054315	0.0040984	0.0109096	0.0014105	0.958513	0.0233896	0.0354153	0.12688
94241-35	ETH17-14A1	2016-01-19	13.9333	10	0.153856	0.002104	0.0844872	0.0002702	0.0013686	0.0001205	0.0001303	3.76e-05	0.0003789	4e-05	1.0186	0.0004019	1.0186	0.0004019	1.0186	0.0004019	1.0186	0.0004019	1.0186	0.0004019	0.011917	0.00013	0.0003319	1.1e-05	0.0001108	1.1e-05	0.0002038	6.9e-06	9.2e-05	1.8e-06	0.0044817	0.0004738	0.0688019	0.0118598	0.0034895	0.0228063	0.0068395	0.0091146	0.0042982	0.0161874	0.0014798	1.81973	0.027496	0.482032	0.143941
94241-36	ETH17-14A1	2016-01-19	16.7833	10	0.0618542	0.001705	0.0775177	0.0002802	0.001462	0.0001205	0.0002045	6.14e-05	0.0001495	3.21e-05	1.0186	0.0004019	1.0186	0.0004019	1.0186	0.0004019	1.0186	0.0004019	1.0186	0.0004019	0.011917	0.00013	0.0003319	1.1e-05	0.0001108	1.1e-05	0.0002038	6.9e-06	9.2e-05	1.8e-06	0.0019274	0.0004132	0.276429	0.0203298	0.006218	0.0394079	0.0121875	0.0182237	0.0046822	0.0188464	0.0016134	0.797356	0.0238576	0.223081	0.125615
94241-37	ETH17-14A1	2016-01-19	19.6667	10	0.0200354	0.0016053	0.0688837	0.0005201	0.0009775	0.0001903	0.000153	5.34e-05	4.2e-05	3.4e-05	1.0186	0.0004019	1.0186	0.0004019	1.0186	0.0004019	1.0186	0.0004019	1.0186	0.0004019	0.011917	0.00013	0.0003319	1.1e-05	0.0001108	1.1e-05	0.0002038	6.9e-06	9.2e-05	1.8e-06	0.0006096	0.0004939	0.736397	0.017163	0.0061077	0.0332009	0.0119712	0.0054114	0.0083169	0.0141802	0.0028668	0.290646	0.0251763	0.10936	0.14959
94241-38	ETH17-14A1	2016-01-19	22.5	10	0.0075091	0.0010084	0.0045771	0.0001803	7.15e-05	9.36e-05	0.0087825	0.0003001	4.22e-05	1.81e-05	1.0186	0.0004019	1.0186	0.0004019	1.0186	0.0004019	1.0186	0.0004019	1.0186	0.0004019	0.011917	0.00013	0.0003319	1.1e-05	0.0001108	1.1e-05	0.0002038	6.9e-06	9.2e-05	1.8e-06	0.0092175	0.003968	42.7196	14.8595	0.806421	29.428	1.6074	0.0065791	0.0622191	0.0156059	0.0212232	1.6394	0.246641	0.063091	1.21605
94241-39	ETH17-14A1	2016-01-20	1.3	10	0.0287328	0.0013065	0.0812841	0.0002802	0.0006984	0.0001604	0.0002855	5.05e-05	4.03e-05	1.71e-05	1.0186	0.0004019	1.0186	0.0004019	1.0186	0.0004019	1.0186	0.0004019	1.0186	0.0004019	0.011917	0.00013	0.0003319	1.1e-05	0.0001108	1.1e-05	0.0002038	6.9e-06	9.2e-05	1.8e-06	0.0004957	0.0002102	1.44579	0.0272671	0.0049106	0.0530055	0.0096251	-0.010749	0.0059354	0.0085861	0.0020459	0.353228	0.0173387	0.206463	0.0650933
94241-40	ETH17-14A1	2016-01-20	4.11667	10	0.137257	0.002104	0.093658	0.0005601	0.0015232	0.0002602	0.0002863	9.03e-05	0.0001487	3.4e-05	1.0186	0.0004019	1.0186	0.0004019	1.0186	0.0004019	1.0186	0.0004019	1.0186	0.0004019	0.011917	0.00013	0.0003319	1.1e-05	0.0001108	1.1e-05	0.0002038	6.9e-06	9.2e-05	1.8e-06	0.0015867	0.0003634	0.393386	0.0237788	0.0076391	0.0461682	0.014973	0.0108851	0.0083603	0.0162516	0.0028826	1.46444	0.0258846	0.992047	0.111306
94241-41	ETH17-14A1	2016-01-20	6.95	10	0.0407779	0.0016053	0.0606439	0.0002602	0.0011871	0.0001205	0.0001292	4.85e-05	0.0001344	3.4e-05	1.0186	0.0004019	1.0186	0.0004019	1.0186	0.0004019	1.0186	0.0004019	1.0186	0.0004019	0.011917	0.00013	0.0003319	1.1e-05	0.0001108	1.1e-05	0.0002038	6.9e-06	9.2e-05	1.8e-06	0.0022149	0.0005611	0.196077	0.0166125	0.0063523	0.0321219	0.0124507	0.0201357	0.0059855	0.01956	0.0020621	0.671923	0.0286389	0.011559	0.169914
94241-42	ETH17-14A1	2016-01-20	9.76667	10	0.034384	0.001705	0.133579	0.0006101	0.0019029	0.0002003	0.0001006	6.14e-05	0.0001293	3.21e-05	1.0186	0.0004019	1.0186	0.0004019	1.0186	0.0004019	1.0186	0.0004019	1.0186	0.0004019	0.011917	0.00013	0.0003319	1.1e-05	0.0001108	1.1e-05	0.0002038	6.9e-06	9.2e-05	1.8e-06	0.0009674	0.0002398	0.155062	0.0058847	0.0036592	0.011095	0.007172	0.0053738	0.0045139	0.0142351	0.0015562	0.257217	0.0137867	-0.0317989	0.0728927
94241-43	ETH17-14A1	2016-01-20	12.6167	10	0.0634365	0.0018047	0.0747077	0.0002702	0.0008914	9.86e-05	0.0001628	8.43e-05	0.0001218	3.4e-05	1.0186	0.0004019	1.0186	0.0004019	1.0186	0.0004019	1.0186	0.0004019	1.0186	0.0004019	0.011917	0.00013	0.0003319	1.1e-05	0.0001108	1.1e-05	0.0002038	6.9e-06	9.2e-05	1.8e-06	0.0016294	0.0004555	0.274032	0.0170736	0.0090038	0.0330257	0.0176476	-0.0016926	0.0039792	0.0119229	0.0013694	0.848507	0.0261898	0.362603	0.138446
94241-44	ETH17-14A1	2016-01-20	15.4833	10	0.0987107	0.0019044	0.0798437	0.0003202	0.0008437	0.0001903	4.66e-05	6.04e-05	0.0002923	3.6e-05	1.0186	0.0004019	1.0186	0.0004019	1.0186	0.0004019	1.0186	0.0004019	1.0186	0.0004019	0.011917	0.00013	0.0003319	1.1e-05	0.0001108	1.1e-05	0.0002038	6.9e-06	9.2e-05	1.8e-06	0.0036585	0.0004514	0.0315645	0.0045816	0.0060511	0.008541	0.0118601	-0.0067599	0.007173	0.0105587	0.0024717	1.23539	0.0261917	0.142615	0.137125
94241-45	ETH17-14A1	2016-01-20	18.9833	10	0.0230709	0.0013065	0.0033318	9.07e-05	1.27e-05	0.0001205	0.0002672	9.82e-05	0.0001159	1.41e-05	1.0186	0.0004019	1.0186	0.0004019	1.0186	0.0004019	1.0186	0.0004019	1.0186	0.0004019	0.011917	0.00013	0.0003319	1.1e-05	0.0001108	1.1e-05	0.0002038	6.9e-06	9.2e-05	1.8e-06	0.034766	0.0043498	0.481302	0.631655	0.237254	1.23815	0.465226	-0.0433301	0.108831	0.003796	0.0374979	6.91926	0.466407	-3.41351	1.33688
94241-46	ETH17-14A1	2016-01-20	21.8	10	0.0128879	0.0011077	0.0227485	0.0002802	0.000159	8.47e-05	0.0001719	7.63e-05	4.6e-05	2.21e-05	1.0186	0.0004019	1.0186	0.0004019	1.0186	0.0004019	1.0186	0.0004019	1.0186	0.0004019	0.011917	0.00013	0.0003319	1.1e-05	0.0001108	1.1e-05	0.0002038	6.9e-06	9.2e-05	1.8e-06	0.0020215	0.00097	0.778938	0.0596437	0.0269869	0.116467	0.0528966	-0.0162198	0.011222	0.0069862	0.0038622	0.566122	0.0528949	-0.0337348	0.294219
94241-47	ETH17-14A1	2016-01-21	0.616667	10	0.0489372	0.0015056	0.0955338	0.0002902	0.0009215	0.0001404	8.16e-05	5.94e-05	8.47e-05	3.11e-05	1.0186	0.0004019	1.0186	0.0004019	1.0186	0.0004019	1.0186	0.0004019	1.0186	0.0004019	0.011917	0.00013	0.0003319	1.1e-05	0.0001108	1.1e-05	0.0002038	6.9e-06	9.2e-05	1.8e-06	0.0008862	0.0003248	0.19547	0.0067605	0.0050118	0.0128116	0.0098232	-0.0079127	0.004425	0.0096384	0.0015244	0.511872	0.0170342	0.24695	0.098452
94241-48	ETH17-14A1	2016-01-21	3.45	10	0.124642	0.0020042	-0.0001838	0.0001404	0.0001953	0.0001404	0.0001184	5.54e-05	0.0004623	3.7e-05	1.0186	0.0004019	1.0186	0.0004019	1.0186	0.0004019	1.0186	0.0004019	1.0186	0.0004019	0.011917	0.00013	0.0003319	1.1e-05	0.0001108	1.1e-05	0.0002038	6.9e-06	9.2e-05	1.8e-06	-2.51382	2.04011	0.0538662	-5.10959	4.79228	-9.97979	9.33541	-1.73415	2.68369	-1.06166	1.16738	-677.727	547.454	72.1075	84.2407
94241-49	ETH17-14A1	2016-01-21	6.31667	10	0.0651157	0.0019044	0.130078	0.0003802	0.0013012	0.0001604	0.0003149	0.0001002	7.01e-05	2.91e-05	1.0186	0.0004019	1.0186	0.0004019	1.0186	0.0004019	1.0186	0.0004019	1.0186	0.0004019	0.011917	0.00013	0.0003319	1.1e-05	0.0001108	1.1e-05	0.0002038	6.9e-06	9.2e-05	1.8e-06	0.0005387	0.0002232	0.935756	0.019245	0.0062407	0.0372817	0.012232	-0.0066851	0.0037109	0.0099957	0.0012787	0.50022	0.0158262	0.340056	0.0684906
94241-50	ETH17-14A1	2016-01-21	9.1	10	0.0372796	0.0019044	0.0010272	8.47e-05	0.0002295	0.0001305	0.0002317	6.34e-05	3.34e-05	3.3e-05	1.0186	0.0004019	1.0186	0.0004019	1.0186	0.0004019	1.0186	0.0004019	1.0186	0.0004019	0.011917	0.00013	0.0003319	1.1e-05	0.0001108	1.1e-05	0.0002038	6.9e-06	9.2e-05	1.8e-06	0.032511	0.0322748	1.46467	1.79712	0.524728	3.52633	1.02987	0.595219	0.386296	0.223245	0.133112	36.2656	3.73764	26.7446	10.0902
94241-51	ETH17-14A1	2016-01-21	11.95	10	0.0369674	0.001705	0.0600743	0.0004501	0.0008894	0.0001006	0.0001744	6.83e-05	0.0001609	2.11e-05	1.0186	0.0004019	1.0186	0.0004019	1.0186	0.0004019	1.0186	0.0004019	1.0186	0.0004019	0.011917	0.00013	0.0003319	1.1e-05	0.0001108	1.1e-05	0.0002038	6.9e-06	9.2e-05	1.8e-06	0.0026767	0.0003512	0.227365	0.0231896	0.0092584	0.0450132	0.0181468	0.0060628	0.005047	0.0147943	0.0017402	0.614905	0.0309168	-0.183057	0.109057
94241-52	ETH17-14A1	2016-01-21	14.8	10	0.100379	0.0018047	0.0674243	0.0004401	0.0003976	0.0001305	7.26e-05	6.64e-05	0.0002687	3.5e-05	1.0186	0.0004019	1.0186	0.0004019	1.0186	0.0004019	1.0186	0.0004019	1.0186	0.0004019	0.011917	0.00013	0.0003319	1.1e-05	0.0001108	1.1e-05	0.0002038	6.9e-06	9.2e-05	1.8e-06	0.0039826	0.0005201	0.0558361	0.0086153	0.0080266	0.0164471	0.0157322	-0.0204708	0.0058319	0.005892	0.0020066	1.48767	0.0305731	0.298203	0.157756
94241-53	ETH17-14A1	2016-01-21	17.7	10	0.0235014	0.001207	0.0597573	0.0002303	0.0009567	0.0001205	0.0002298	7.23e-05	5.2e-05	2.71e-05	1.0186	0.0004019	1.0186	0.0004019	1.0186	0.0004019	1.0186	0.0004019	1.0186	0.0004019	0.011917	0.00013	0.0003319	1.1e-05	0.0001108	1.1e-05	0.0002038	6.9e-06	9.2e-05	1.8e-06	0.0008699	0.0004525	0.933468	0.0308655	0.0098954	0.0600587	0.0193956	0.0105446	0.0060703	0.0159987	0.0020917	0.392989	0.0217876	0.135166	0.136845
94241-54	ETH17-14A1	2016-01-21	20.5333	10	0.135707	0.002104	0.116334	0.0006101	0.0018479	0.0002003	4.71e-05	3.27e-05	0.0002975	3.8e-05	1.0186	0.0004019	1.0186	0.0004019	1.0186	0.0004019	1.0186	0.0004019	1.0186	0.0004019	0.011917	0.00013	0.0003319	1.1e-05	0.0001108	1.1e-05	0.0002038	6.9e-06	9.2e-05	1.8e-06	0.0025556	0.0003271	0.0314418	0.0032561	0.0023058	0.005943	0.0045193	0.0092549	0.0051841	0.0158729	0.0017873	1.16567	0.0205054	0.402353	0.0995197
94241-55	ETH17-14A1	2016-01-21	23.4167	10	0.0851801	0.002104	0.102121	0.0005201	0.0014278	0.0001704	0.0001737	5.94e-05	0.0002057	3.3e-05	1.0186	0.0004019	1.0186	0.0004019	1.0186	0.0004019	1.0186	0.0004019	1.0186	0.0004019	0.011917	0.00013	0.0003319	1.1e-05	0.0001108	1.1e-05	0.0002038	6.9e-06	9.2e-05	1.8e-06	0.002013	0.0003236	0.177607	0.0137153	0.0047782	0.0264432	0.0093654	0.0040359	0.0050226	0.0139707	0.0017312	0.833491	0.0226152	0.232908	0.0990797
94241-56	ETH17-14A1	2016-01-22	2.26667	10	0.0329954	0.001705	0.0754115	0.0004601	0.0006652	0.0002203	0.0002729	7.63e-05	8.73e-05	3.11e-05	1.0186	0.0004019	1.0186	0.0004019	1.0186	0.0004019	1.0186	0.0004019	1.0186	0.0004019	0.011917	0.00013	0.0003319	1.1e-05	0.0001108	1.1e-05	0.0002038	6.9e-06	9.2e-05	1.8e-06	0.0011571	0.0004115	0.664778	0.0292497	0.0083332	0.0568916	0.0163336	-0.0104475	0.008789	0.0088146	0.0030289	0.437213	0.0244841	0.0931436	0.125242
94241-57	ETH17-14A1	2016-01-22	5.08333	10	0.0646206	0.0020042	0.0829284	0.0002802	0.0008333	0.0001205	0.0002964	7.83e-05	0.0001399	3.5e-05	1.0186	0.0004019	1.0186	0.0004019	1.0186	0.0004019	1.0186	0.0004019	1.0186	0.0004019	0.011917	0.00013	0.0003319	1.1e-05	0.0001108	1.1e-05	0.0002038	6.9e-06	9.2e-05	1.8e-06	0.001686	0.0004223	0.451654	0.0289591	0.0077925	0.0563219	0.0152738	-0.0071807	0.0043772	0.0100408	0.001507	0.778652	0.0261481	0.276705	0.128748
94241-58	ETH17-14A1	2016-01-22	7.98333	10	0.0643084	0.0016053	0.0926498	0.0003002	0.0011767	0.0001504	0.0001623	0.0001002	0.0001183	3.3e-05	1.0186	0.0004019	1.0186	0.0004019	1.0186	0.0004019	1.0186	0.0004019	1.0186	0.0004019	0.011917	0.00013	0.0003319	1.1e-05	0.0001108	1.1e-05	0.0002038	6.9e-06	9.2e-05	1.8e-06	0.0012761	0.0003565	0.290741	0.0142247	0.0089493	0.0274416	0.0175408	0.0007275	0.0048865	0.0126909	0.0016836	0.693584	0.0187908	0.312981	0.108054
94241-59	ETH17-14A1	2016-01-22	11.05	10	0.0270536	0.001207	0.0622915	0.0002702	0.0006849	0.0001404	6.74e-05	5.15e-05	-2.64e-05	2.71e-05	1.0186	0.0004019	1.0186	0.0004019	1.0186	0.0004019	1.0186	0.0004019	1.0186	0.0004019	0.011917	0.00013	0.0003319	1.1e-05	0.0001108	1.1e-05	0.0002038	6.9e-06	9.2e-05	1.8e-06	-0.0004232	0.0004341	-0.537268	0.0088036	0.0068515	0.0168161	0.013429	-0.0032843	0.0067847	0.0109874	0.0023379	0.433982	0.0209396	0.560219	0.131297
94241-60	ETH17-14A1	2016-01-22	12.55	10	0.10574	0.001705	0.145022	0.0003502	0.0019164	0.0001803	0.0004474	0.0001202	0.0001978	3.4e-05	1.0186	0.0004019	1.0186	0.0004019	1.0186	0.0004019	1.0186	0.0004019	1.0186	0.0004019	0.011917	0.00013	0.0003319	1.1e-05	0.0001108	1.1e-05	0.0002038	6.9e-06	9.2e-05	1.8e-06	0.001363	0.0002346	0.484547	0.025147	0.006882	0.04885	0.0134892	0.0021711	0.0037423	0.0132047	0.0012897	0.728583	0.0127859	0.322918	0.0711893
94241-61	ETH17-14A1	2016-01-22	15.3833	10	0.040638	0.0011077	0.0590714	0.0002502	0.0013946	0.0002702	0.0001098	5.64e-05	7.6e-05	3.01e-05	1.0186	0.0004019	1.0186	0.0004019	1.0186	0.0004019	1.0186	0.0004019	1.0186	0.0004019	0.011917	0.00013	0.0003319	1.1e-05	0.0001108	1.1e-05	0.0002038	6.9e-06	9.2e-05	1.8e-06	0.001286	0.0005084	0.308446	0.0151918	0.0079497	0.0293372	0.0155816	0.0323318	0.0137592	0.0235903	0.004744	0.687432	0.0204061	0.30454	0.153136
94241-62	ETH17-14A1	2016-01-22	18.25	10	0.0273442	0.001406	0.0959343	0.0005501	0.0015668	0.0001803	0.0001379	5.25e-05	2.62e-05	3.01e-05	1.0186	0.0004019	1.0186	0.0004019	1.0186	0.0004019	1.0186	0.0004019	1.0186	0.0004019	0.011917	0.00013	0.0003319	1.1e-05	0.0001108	1.1e-05	0.0002038	6.9e-06	9.2e-05	1.8e-06	0.0002731	0.000313	1.12095	0.0117765	0.004562	0.022643	0.0089415	0.011799	0.0056592	0.0163195	0.0019514	0.284817	0.0158603	0.203678	0.0947951
94241-63	ETH17-14A1	2016-01-22	21.0667	10	0.0233938	0.0011077	0.058133	0.0004501	0.0004899	0.0001305	0.0002374	9.72e-05	9.1e-05	3.3e-05	1.0186	0.0004019	1.0186	0.0004019	1.0186	0.0004019	1.0186	0.0004019	1.0186	0.0004019	0.011917	0.00013	0.0003319	1.1e-05	0.0001108	1.1e-05	0.0002038	6.9e-06	9.2e-05	1.8e-06	0.0015645	0.0005682	0.56392	0.0335175	0.01399	0.0652568	0.027421	-0.0118123	0.0067621	0.0084207	0.0023278	0.402116	0.0207595	-0.0633058	0.170856
94241-64	ETH17-14A1	2016-01-22	23.9	10	0.123684	0.0022038	0.164324	0.0007201	0.0020554	0.0003002	0.0001568	8.33e-05	0.0002866	3.5e-05	1.0186	0.0004019	1.0186	0.0004019	1.0186	0.0004019	1.0186	0.0004019	1.0186	0.0004019	0.011917	0.00013	0.0003319	1.1e-05	0.0001108	1.1e-05	0.0002038	6.9e-06	9.2e-05	1.8e-06	0.0017429	0.0002133	0.115962	0.0078509	0.0042481	0.0149488	0.0083262	-8.53e-05	0.0054967	0.0124989	0.001895	0.752114	0.0148444	0.23162	0.0652613
94241-65	ETH17-14A1	2016-01-23	2.75	10	0.0858045	0.0020042	0.0876692	0.0005801	0.0008115	0.0001105	0.0002493	5.25e-05	0.0001731	3.5e-05	1.0186	0.0004019	1.0186	0.0004019	1.0186	0.0004019	1.0186	0.0004019	1.0186	0.0004019	0.011917	0.00013	0.0003319	1.1e-05	0.0001108	1.1e-05	0.0002038	6.9e-06	9.2e-05	1.8e-06	0.0019732	0.0003997	0.311938	0.0234512	0.0050293	0.045526	0.0098577	-0.0096333	0.0038064	0.0092495	0.001309	0.977994	0.0255282	0.389811	0.121813
94241-66	ETH17-14A1	2016-01-23	5.61667	10	0.0288943	0.0013065	0.0287469	0.0001903	0.0005692	0.0001006	0.00011	4.95e-05	9.3e-05	3.5e-05	1.0186	0.0004019	1.0186	0.0004019	1.0186	0.0004019	1.0186	0.0004019	1.0186	0.0004019	0.011917	0.00013	0.0003319	1.1e-05	0.0001108	1.1e-05	0.0002038	6.9e-06	9.2e-05	1.8e-06	0.0032334	0.0012184	0.257517	0.031645	0.0144969	0.0615864	0.0284147	0.0202298	0.0105476	0.0197838	0.003631	1.00437	0.0493927	0.0411335	0.367007
94241-67	ETH17-14A1	2016-01-23	8.46667	10	0.0277533	0.0015056	0.0695061	0.0004501	0.0007565	0.0001504	9.59e-05	4.65e-05	5.25e-05	3.11e-05	1.0186	0.0004019	1.0186	0.0004019	1.0186	0.0004019	1.0186	0.0004019	1.0186	0.0004019	0.011917	0.00013	0.0003319	1.1e-05	0.0001108	1.1e-05	0.0002038	6.9e-06	9.2e-05	1.8e-06	0.000755	0.0004464	0.393328	0.0114308	0.0056492	0.0219656	0.0110725	-0.0042514	0.0065154	0.010876	0.0022447	0.398991	0.0234617	0.173645	0.135316
94241-68	ETH17-14A1	2016-01-23	11.2833	10	0.0783987	0.0016053	0.115246	0.0006401	0.0015263	0.0001803	2.47518e-06	6.64e-05	0.0001906	3.4e-05	1.0186	0.0004019	1.0186	0.0004019	1.0186	0.0004019	1.0186	0.0004019	1.0186	0.0004019	0.011917	0.00013	0.0003319	1.1e-05	0.0001108	1.1e-05	0.0002038	6.9e-06	9.2e-05	1.8e-06	0.0016528	0.0002954	-0.0007313	0.0001784	0.0048716	-8.94e-05	0.0095483	0.0020949	0.0047123	0.013234	0.0016242	0.679759	0.0155081	0.18561	0.0894174
94242-01	ETH17-14C	2016-01-23	14.1	10	0.0477391	0.0010084	0.0943365	0.0005401	0.0009868	0.0001404	3.46e-05	6.54e-05	0.0001032	1.91e-05	1.0186	0.0004019	1.0186	0.0004019	1.0186	0.0004019	1.0186	0.0004019	1.0186	0.0004019	0.011917	0.00013	0.0003319	1.1e-05	0.0001108	1.1e-05	0.0002038	6.9e-06	9.2e-05	1.8e-06	0.0010933	0.0002023	0.0684946	0.00305	0.0058758	0.0055389	0.0115165	-0.0056643	0.0044825	0.0104529	0.0015447	0.505669	0.0119006	0.178632	0.0614577
94242-02	ETH17-14C	2016-01-23	16.9	10	0.0757507	0.001406	0.11738	0.0005501	0.0013842	0.0002003	0.0002023	6.74e-05	0.0001629	3.3e-05	1.0186	0.0004019	1.0186	0.0004019	1.0186	0.0004019	1.0186	0.0004019	1.0186	0.0004019	0.011917	0.00013	0.0003319	1.1e-05	0.0001108	1.1e-05	0.0002038	6.9e-06	9.2e-05	1.8e-06	0.0013869	0.0002814	0.270535	0.0143829	0.0048778	0.0277518	0.0095605	-0.0019649	0.0051362	0.0117834	0.0017702	0.64486	0.0132776	0.231136	0.0849962
94242-03	ETH17-14C	2016-01-23	19.7333	10	0.0460524	0.0013065	0.148819	0.0007501	0.0016321	0.0001803	2.31e-05	6.34e-05	2.15e-05	3.11e-05	1.0186	0.0004019	1.0186	0.0004019	1.0186	0.0004019	1.0186	0.0004019	1.0186	0.0004019	0.011917	0.00013	0.0003319	1.1e-05	0.0001108	1.1e-05	0.0002038	6.9e-06	9.2e-05	1.8e-06	0.0001445	0.0002085	0.196511	0.0012955	0.0036282	0.0021002	0.0071113	-0.0036781	0.0036502	0.0109589	0.0012577	0.309217	0.0095869	0.265365	0.062981
94242-04	ETH17-14C	2016-01-23	22.55	10	0.0317145	0.0011077	0.0580527	0.0004801	0.0007908	0.0001803	0.0001503	5.64e-05	4.14e-05	3.11e-05	1.0186	0.0004019	1.0186	0.0004019	1.0186	0.0004019	1.0186	0.0004019	1.0186	0.0004019	0.011917	0.00013	0.0003319	1.1e-05	0.0001108	1.1e-05	0.0002038	6.9e-06	9.2e-05	1.8e-06	0.0007129	0.0005345	0.798301	0.0217013	0.008302	0.0420961	0.0162722	0.0037047	0.00935	0.013611	0.0032228	0.545891	0.021073	0.334075	0.160929
94242-05	ETH17-14C	2016-01-24	1.38333	10	0.114588	0.001705	0.119243	0.0006201	0.0014578	0.0001604	4.92e-05	4.85e-05	0.000329	2.31e-05	1.0186	0.0004019	1.0186	0.0004019	1.0186	0.0004019	1.0186	0.0004019	1.0186	0.0004019	0.011917	0.00013	0.0003319	1.1e-05	0.0001108	1.1e-05	0.0002038	6.9e-06	9.2e-05	1.8e-06	0.0027571	0.0001939	0.0311907	0.0034692	0.003481	0.0063606	0.0068228	-0.0014592	0.00405	0.0122165	0.001396	0.960233	0.0162653	0.136559	0.0597566
94242-06	ETH17-14C	2016-01-24	4.28333	10	0.023383	0.001207	0.0737375	0.0005101	0.0009108	9.36e-05	8.74e-05	4.36e-05	6.12e-06	2.71e-05	1.0186	0.0004019	1.0186	0.0004019	1.0186	0.0004019	1.0186	0.0004019	1.0186	0.0004019	0.011917	0.00013	0.0003319	1.1e-05	0.0001108	1.1e-05	0.0002038	6.9e-06	9.2e-05	1.8e-06	8.29e-05	0.0003667	3.11954	0.0099869	0.0050679	0.0191354	0.0099332	0.0003687	0.0038326	0.0123424	0.0013198	0.316871	0.0177605	0.292161	0.110914
94242-07	ETH17-14C	2016-01-24	7.08333	10	0.0491202	0.0011077	0.105387	0.0003102	0.0015678	0.0001704	2.34e-05	7.93e-05	8.43e-05	1.91e-05	1.0186	0.0004019	1.0186	0.0004019	1.0186	0.0004019	1.0186	0.0004019	1.0186	0.0004019	0.011917	0.00013	0.0003319	1.1e-05	0.0001108	1.1e-05	0.0002038	6.9e-06	9.2e-05	1.8e-06	0.0007995	0.000181	0.054596	0.0018711	0.0064712	0.0032284	0.0126835	0.0072929	0.0048626	0.0148654	0.0016765	0.465737	0.0113999	0.226577	0.0552077
94242-08	ETH17-14C	2016-01-24	9.88333	10	0.109324	0.0016053	0.0808465	0.0004901	0.0010169	0.0001604	6.05e-05	8.73e-05	0.0002305	3.21e-05	1.0186	0.0004019	1.0186	0.0004019	1.0186	0.0004019	1.0186	0.0004019	1.0186	0.0004019	0.011917	0.00013	0.0003319	1.1e-05	0.0001108	1.1e-05	0.0002038	6.9e-06	9.2e-05	1.8e-06	0.0028492	0.0003966	0.0568503	0.0063363	0.0093051	0.0119801	0.018238	-0.0004876	0.0059728	0.0125688	0.0020582	1.35121	0.0230529	0.500316	0.120243
94242-09	ETH17-14C	2016-01-24	12.7167	10	0.50353	0.0033026	0.0011827	0.0001704	0.0005158	0.0001305	6.65e-05	6.74e-05	0.0015844	6.2e-05	1.0186	0.0004019	1.0186	0.0004019	1.0186	0.0004019	1.0186	0.0004019	1.0186	0.0004019	0.011917	0.00013	0.0003319	1.1e-05	0.0001108	1.1e-05	0.0002038	6.9e-06	9.2e-05	1.8e-06	1.3387	0.210427	0.0094432	0.477265	0.497395	0.93531	0.975216	0.496786	0.34156	0.435828	0.132223	425.439	64.8366	25.8121	16.4283
94242-10	ETH17-14C	2016-01-24	14.1667	10	0.0828335	0.0015056	0.100151	0.0003102	0.0018054	0.0002403	0.0003995	9.13e-05	0.0002089	3.5e-05	1.0186	0.0004019	1.0186	0.0004019	1.0186	0.0004019	1.0186	0.0004019	1.0186	0.0004019	0.011917	0.00013	0.0003319	1.1e-05	0.0001108	1.1e-05	0.0002038	6.9e-06	9.2e-05	1.8e-06	0.0020845	0.0003497	0.42784	0.0338774	0.0078832	0.0659623	0.0154517	0.0157226	0.0072166	0.018013	0.0024878	0.826457	0.0163995	0.206347	0.105657
94242-11	ETH17-14C	2016-01-24	16.9833	10	0.180615	0.0025034	0.150107	0.0004101	0.0021903	0.0003402	0.0002739	7.63e-05	0.000472	3.8e-05	1.0186	0.0004019	1.0186	0.0004019	1.0186	0.0004019	1.0186	0.0004019	1.0186	0.0004019	0.011917	0.00013	0.0003319	1.1e-05	0.0001108	1.1e-05	0.0002038	6.9e-06	9.2e-05	1.8e-06	0.0031421	0.0002534	0.129117	0.0155336	0.0044082	0.0300072	0.0086402	0.0051869	0.0068162	0.0145804	0.0023499	1.20232	0.0182787	0.264782	0.0777314
94242-12	ETH17-14C	2016-01-24	19.85	10	0.0464291	0.001207	0.077357	0.0003902	0.0009505	0.0001903	0.0001027	4.95e-05	8.2e-05	3.11e-05	1.0186	0.0004019	1.0186	0.0004019	1.0186	0.0004019	1.0186	0.0004019	1.0186	0.0004019	0.011917	0.00013	0.0003319	1.1e-05	0.0001108	1.1e-05	0.0002038	6.9e-06	9.2e-05	1.8e-06	0.0010595	0.0004011	0.27774	0.011328	0.0055598	0.0217641	0.0108972	-0.0003516	0.007403	0.0122781	0.0025515	0.599734	0.0170877	0.283563	0.120942
94242-13	ETH17-14C	2016-01-24	22.6333	10	0.0332538	0.0011077	0.0390632	0.0002303	0.000287	8.27e-05	0.0001286	6.54e-05	9.25e-05	2.21e-05	1.0186	0.0004019	1.0186	0.0004019	1.0186	0.0004019	1.0186	0.0004019	1.0186	0.0004019	0.011917	0.00013	0.0003319	1.1e-05	0.0001108	1.1e-05	0.0002038	6.9e-06	9.2e-05	1.8e-06	0.0023667	0.0005648	0.312678	0.0281486	0.0145773	0.0547332	0.0285721	-0.0153843	0.0063803	0.0073405	0.0021963	0.850629	0.0309605	0.145238	0.171335
94242-14	ETH17-14C	2016-01-25	1.43333	10	0.0895612	0.0015056	0.0865997	0.0005501	0.0009152	0.0001803	0.0002579	0.0001102	0.0002	3.4e-05	1.0186	0.0004019	1.0186	0.0004019	1.0186	0.0004019	1.0186	0.0004019	1.0186	0.0004019	0.011917	0.00013	0.0003319	1.1e-05	0.0001108	1.1e-05	0.0002038	6.9e-06	9.2e-05	1.8e-06	0.0023079	0.0003932	0.290575	0.0255308	0.0111135	0.0496022	0.0217829	-0.0060135	0.0062696	0.0105606	0.0021601	1.0334	0.0199516	0.345514	0.118812
94242-15	ETH17-14C	2016-01-25	4.25	10	0.0965902	0.001705	0.138781	0.0003902	0.0022794	9.56e-05	3.51e-05	5.64e-05	0.0002475	2.01e-05	1.0186	0.0004019	1.0186	0.0004019	1.0186	0.0004019	1.0186	0.0004019	1.0186	0.0004019	0.011917	0.00013	0.0003319	1.1e-05	0.0001108	1.1e-05	0.0002038	6.9e-06	9.2e-05	1.8e-06	0.0017822	0.0001447	0.028953	0.0021711	0.0035581	0.0038164	0.0069738	0.0112408	0.0020764	0.0164119	0.0007161	0.695457	0.0133786	0.163007	0.0451586
94242-16	ETH17-14C	2016-01-25	7.08333	10	0.0491632	0.0013065	0.0508211	0.0003902	0.0004257	7.18e-05	0.0004545	0.0001102	0.0001225	2.01e-05	1.0186	0.0004019	1.0186	0.0004019	1.0186	0.0004019	1.0186	0.0004019	1.0186	0.0004019	0.011917	0.00013	0.0003319	1.1e-05	0.0001108	1.1e-05	0.0002038	6.9e-06	9.2e-05	1.8e-06	0.002409	0.0003953	0.844811	0.0770208	0.0190342	0.15053	0.0373094	-0.0124182	0.0042672	0.0083694	0.0014673	0.966636	0.0287466	0.252546	0.121123
94242-17	ETH17-14C	2016-01-25	9.88333	10	0.218355	0.0025034	0.0717645	0.0002702	0.000963	0.0001305	2.99e-05	4.65e-05	0.0006726	3.9e-05	1.0186	0.0004019	1.0186	0.0004019	1.0186	0.0004019	1.0186	0.0004019	1.0186	0.0004019	0.011917	0.00013	0.0003319	1.1e-05	0.0001108	1.1e-05	0.0002038	6.9e-06	9.2e-05	1.8e-06	0.0093654	0.0005449	0.0095339	0.0035934	0.0056989	0.006604	0.0111698	-0.0016167	0.0054759	0.0134082	0.0018855	3.04032	0.0394442	0.243689	0.16665
94242-18	ETH17-14C	2016-01-25	12.75	10	0.0511115	0.001705	0.0663939	0.0002602	0.00077	0.0001803	3.19e-05	5.64e-05	0.0001131	2.71e-05	1.0186	0.0004019	1.0186	0.0004019	1.0186	0.0004019	1.0186	0.0004019	1.0186	0.0004019	0.011917	0.00013	0.0003319	1.1e-05	0.0001108	1.1e-05	0.0002038	6.9e-06	9.2e-05	1.8e-06	0.0017025	0.0004073	0.0612464	0.0041587	0.0074897	0.007712	0.0146798	-0.0027036	0.008171	0.0115886	0.0028164	0.769231	0.027808	0.260476	0.124702
94242-19	ETH17-14C	2016-01-25	15.5333	10	0.0406918	0.0011077	0.12631	0.0003302	0.0013831	0.0001205	0.0002636	9.62e-05	7.11e-05	1.61e-05	1.0186	0.0004019	1.0186	0.0004019	1.0186	0.0004019	1.0186	0.0004019	1.0186	0.0004019	0.011917	0.00013	0.0003319	1.1e-05	0.0001108	1.1e-05	0.0002038	6.9e-06	9.2e-05	1.8e-06	0.0005626	0.0001274	0.842016	0.018101	0.0067313	0.0350394	0.0131935	-0.003954	0.002871	0.010942	0.0009896	0.321911	0.0094758	0.154546	0.0391905
94242-20	ETH17-14C	2016-01-25	18.35	10	0.0084908	0.000771	0.0017942	9.17e-05	8.73e-05	9.27e-05	2.03e-05	4.55e-05	2.31e-05	1.81e-05	1.0186	0.0004019	1.0186	0.0004019	1.0186	0.0004019	1.0186	0.0004019	1.0186	0.0004019	0.011917	0.00013	0.0003319	1.1e-05	0.0001108	1.1e-05	0.0002038	6.9e-06	9.2e-05	1.8e-06	0.0128759	0.0100985	0.20195	0.0983481	0.224721	0.192336	0.440484	0.0985157	0.15548	0.0485913	0.0536034	4.72866	0.528085	0.893354	3.04391
94242-21	ETH17-14C	2016-01-25	21.1167	10	0.0793244	0.0013065	0.0872687	0.0002802	0.0013022	0.0001604	6.98e-05	2.5e-05	0.0001829	3.11e-05	1.0186	0.0004019	1.0186	0.0004019	1.0186	0.0004019	1.0186	0.0004019	1.0186	0.0004019	0.011917	0.00013	0.0003319	1.1e-05	0.0001108	1.1e-05	0.0002038	6.9e-06	9.2e-05	1.8e-06	0.0020944	0.0003556	0.0853369	0.0069686	0.0025395	0.0132196	0.0049775	0.0067162	0.0055303	0.0149105	0.001906	0.908267	0.0164002	0.282881	0.107382
94242-22	ETH17-14C	2016-01-25	23.95	10	0.103027	0.0016053	0.0730601	0.0004301	0.0008229	0.0001704	0.0004515	9.72e-05	0.0002139	3.11e-05	1.0186	0.0004019	1.0186	0.0004019	1.0186	0.0004019	1.0186	0.0004019	1.0186	0.0004019	0.011917	0.00013	0.0003319	1.1e-05	0.0001108	1.1e-05	0.0002038	6.9e-06	9.2e-05	1.8e-06	0.0029257	0.0004251	0.486737	0.0539623	0.0118443	0.105331	0.023216	-0.004335	0.0070184	0.0112548	0.0024184	1.40908	0.0252149	0.539033	0.129047
94242-23	ETH17-14C	2016-01-26	2.73333	10	0.156062	0.0022038	0.0557679	0.0004301	0.0003623	0.0001704	0.0002825	8.33e-05	0.0004734	2.41e-05	1.0186	0.0004019	1.0186	0.0004019	1.0186	0.0004019	1.0186	0.0004019	1.0186	0.0004019	0.011917	0.00013	0.0003319	1.1e-05	0.0001108	1.1e-05	0.0002038	6.9e-06	9.2e-05	1.8e-06	0.0084825	0.0004367	0.137808	0.0443359	0.0133198	0.086462	0.0261078	-0.0211899	0.0091941	0.0064912	0.0031674	2.79626	0.0482473	0.266082	0.135676
94242-24	ETH17-14C	2016-01-26	13.2333	10	0.0538994	0.0011077	0.0855609	0.0002702	0.0004256	0.0003502	0.0004577	7.23e-05	0.0001355	1.91e-05	1.0186	0.0004019	1.0186	0.0004019	1.0186	0.0004019	1.0186	0.0004019	1.0186	0.0004019	0.011917	0.00013	0.0003319	1.1e-05	0.0001108	1.1e-05	0.0002038	6.9e-06	9.2e-05	1.8e-06	0.0015827	0.0002229	0.787028	0.047228	0.0076042	0.0921309	0.0149051	-0.0218286	0.0123072	0.00497	0.0042431	0.629465	0.0140854	0.159527	0.0680006
94242-25	ETH17-14C	2016-01-26	16.0667	10	0.09039	0.001406	0.0989979	0.0004901	0.0021405	0.0001803	0.0001001	2.21e-05	0.0001378	3.01e-05	1.0186	0.0004019	1.0186	0.0004019	1.0186	0.0004019	1.0186	0.0004019	1.0186	0.0004019	0.011917	0.00013	0.0003319	1.1e-05	0.0001108	1.1e-05	0.0002038	6.9e-06	9.2e-05	1.8e-06	0.0013911	0.0003034	0.166121	0.0089442	0.0020133	0.0170917	0.0039461	0.0265153	0.0054845	0.0216048	0.001892	0.91234	0.0160099	0.497483	0.0918913
94242-26	ETH17-14C	2016-01-26	18.9167	10	0.103781	0.0016053	0.135237	0.0006301	0.0015761	0.0001305	0.0002031	5.54e-05	0.0002095	2.01e-05	1.0186	0.0004019	1.0186	0.0004019	1.0186	0.0004019	1.0186	0.0004019	1.0186	0.0004019	0.011917	0.00013	0.0003319	1.1e-05	0.0001108	1.1e-05	0.0002038	6.9e-06	9.2e-05	1.8e-06	0.0015481	0.0001486	0.22425	0.0133242	0.0037041	0.0256766	0.0072601	-0.0024536	0.002907	0.0116454	0.0010018	0.766799	0.0133184	0.30487	0.0461364
94242-27	ETH17-14C	2016-01-26	21.7	10	0.134588	0.001705	0.0070486	9.17e-05	-0.000256	0.0001903	0.0001617	6.14e-05	0.0004359	2.31e-05	1.0186	0.0004019	1.0186	0.0004019	1.0186	0.0004019	1.0186	0.0004019	1.0186	0.0004019	0.011917	0.00013	0.0003319	1.1e-05	0.0001108	1.1e-05	0.0002038	6.9e-06	9.2e-05	1.8e-06	0.061797	0.003379	0.087359	0.203942	0.0789256	0.399344	0.154717	-0.17444	0.0812513	-0.0362976	0.0279976	19.0795	0.369485	0.641538	1.01117
94242-28	ETH17-14C	2016-01-27	0.5	10	0.147505	0.0019044	0.0120063	0.0001305	-0.0001233	0.0001305	8.12e-05	6.93e-05	0.0004653	2.51e-05	1.0186	0.0004019	1.0186	0.0004019	1.0186	0.0004019	1.0186	0.0004019	1.0186	0.0004019	0.011917	0.00013	0.0003319	1.1e-05	0.0001108	1.1e-05	0.0002038	6.9e-06	9.2e-05	1.8e-06	0.0387262	0.0021329	0.0410952	0.0602791	0.0524322	0.117713	0.102772	-0.0863012	0.0327105	-0.0102575	0.0112663	12.276	0.221386	0.716391	0.646128
94242-29	ETH17-14C	2016-01-27	3.31667	10	0.107548	0.0015056	0.142327	0.0004101	0.0018095	0.0001205	0.0001758	5.94e-05	0.000254	3.3e-05	1.0186	0.0004019	1.0186	0.0004019	1.0186	0.0004019	1.0186	0.0004019	1.0186	0.0004019	0.011917	0.00013	0.0003319	1.1e-05	0.0001108	1.1e-05	0.0002038	6.9e-06	9.2e-05	1.8e-06	0.0017834	0.0002321	0.160653	0.0110355	0.0037975	0.0211906	0.0074432	0.0004878	0.0025511	0.012704	0.0008786	0.755049	0.011613	0.222744	0.0702143
94242-30	ETH17-14C	2016-01-27	6.15	10	0.0022691	0.00085	0.0006116	7.38e-05	-0.0001192	9.66e-05	0.0001194	7.03e-05	9.22e-06	1.91e-05	1.0186	0.0004019	1.0186	0.0004019	1.0186	0.0004019	1.0186	0.0004019	1.0186	0.0004019	0.011917	0.00013	0.0003319	1.1e-05	0.0001108	1.1e-05	0.0002038	6.9e-06	9.2e-05	1.8e-06	0.0150643	0.0312418	3.07478	1.74813	1.07236	3.43006	2.10448	-0.609	0.482279	-0.194765	0.165681	3.70741	1.5681	-0.664929	9.44171
94242-31	ETH17-14C	2016-01-27	8.88333	10	0.0089224	0.0009489	2.56e-05	5.9e-05	1.42e-05	7.18e-05	0.0001559	6.14e-05	9.32e-06	2.41e-05	1.0186	0.0004019	1.0186	0.0004019	1.0186	0.0004019	1.0186	0.0004019	1.0186	0.0004019	0.011917	0.00013	0.0003319	1.1e-05	0.0001108	1.1e-05	0.0002038	6.9e-06	9.2e-05	1.8e-06	0.364144	1.29361	3.9802	54.6932	135.22	111.434	286.113	1.43679	9.52196	0.555328	3.21224	348.61	851.395	253.895	708.171
94242-32	ETH17-14C	2016-01-27	11.65	10	0.0244896	0.0009985	0.0987739	0.0005101	0.0017265	0.0001803	7.65e-05	3.86e-05	4.22e-06	2.31e-05	1.0186	0.0004019	1.0186	0.0004019	1.0186	0.0004019	1.0186	0.0004019	1.0186	0.0004019	0.011917	0.00013	0.0003319	1.1e-05	0.0001108	1.1e-05	0.0002038	6.9e-06	9.2e-05	1.8e-06	4.27e-05	0.0002334	4.18645	0.0069682	0.0035823	0.0132187	0.0070214	0.0152497	0.0054949	0.0174661	0.0018952	0.247742	0.0109581	0.235089	0.0705379
94242-33	ETH17-14C	2016-01-27	14.4667	10	0.0366229	0.001207	0.0036832	8.47e-05	-0.0001211	7.98e-05	3.45e-05	6.34e-05	0.0001023	2.91e-05	1.0186	0.0004019	1.0186	0.0004019	1.0186	0.0004019	1.0186	0.0004019	1.0186	0.0004019	0.011917	0.00013	0.0003319	1.1e-05	0.0001108	1.1e-05	0.0002038	6.9e-06	9.2e-05	1.8e-06	0.0277582	0.0079113	0.0803031	0.0843399	0.158017	0.164877	0.309731	-0.145813	0.0653591	-0.0328454	0.0224654	9.93538	0.427324	1.65114	2.38029
94242-34	ETH17-14C	2016-01-27	17.1833	10	0.0626507	0.0011077	0.054188	0.0004002	0.0007057	0.0001105	0.000193	8.13e-05	0.0001606	3.01e-05	1.0186	0.0004019	1.0186	0.0004019	1.0186	0.0004019	1.0186	0.0004019	1.0186	0.0004019	0.011917	0.00013	0.0003319	1.1e-05	0.0001108	1.1e-05	0.0002038	6.9e-06	9.2e-05	1.8e-06	0.0029618	0.0005547	0.285849	0.0321722	0.0138091	0.0626199	0.0270664	0.0007408	0.0061477	0.0130126	0.0021175	1.15527	0.0237689	0.272809	0.166947
94242-35	ETH17-14C	2016-01-27	19.9833	10	0.0452881	0.001406	0.0631041	0.0002403	0.0006756	0.0001205	0.0003891	8.63e-05	0.000104	2.81e-05	1.0186	0.0004019	1.0186	0.0004019	1.0186	0.0004019	1.0186	0.0004019	1.0186	0.0004019	0.011917	0.00013	0.0003319	1.1e-05	0.0001108	1.1e-05	0.0002038	6.9e-06	9.2e-05	1.8e-06	0.0016471	0.0004443	0.894874	0.0558443	0.0126139	0.10902	0.0247245	-0.0052516	0.0057486	0.0106976	0.0019802	0.717109	0.0241418	0.228933	0.134811
94242-36	ETH17-14C	2016-01-27	22.7667	10	0.100358	0.0016053	0.122581	0.0005401	0.0015354	9.76e-05	0.0001904	4.95e-05	0.0001498	3.3e-05	1.0186	0.0004019	1.0186	0.0004019	1.0186	0.0004019	1.0186	0.0004019	1.0186	0.0004019	0.011917	0.00013	0.0003319	1.1e-05	0.0001108	1.1e-05	0.0002038	6.9e-06	9.2e-05	1.8e-06	0.0012212	0.0002695	0.301078	0.0140991	0.0037329	0.0271955	0.0073166	0.0002505	0.0024046	0.0125161	0.0008277	0.818059	0.0145961	0.45382	0.0816907
94242-37	ETH17-14C	2016-01-28	1.58333	10	0.0656109	0.001406	0.111318	0.0003202	0.0016607	9.27e-05	7.07e-05	5.34e-05	0.0001279	2.71e-05	1.0186	0.0004019	1.0186	0.0004019	1.0186	0.0004019	1.0186	0.0004019	1.0186	0.0004019	0.011917	0.00013	0.0003319	1.1e-05	0.0001108	1.1e-05	0.0002038	6.9e-06	9.2e-05	1.8e-06	0.0011482	0.0002429	0.128227	0.00578	0.0044496	0.0108899	0.0087212	0.0072219	0.0025085	0.0149065	0.0008641	0.588936	0.0137059	0.245967	0.0737909
94242-38	ETH17-14C	2016-01-28	4.43333	10	0.103716	0.001705	7.94e-05	0.0001105	0.0001721	9.07e-05	6.46e-05	5.15e-05	0.0003304	3.5e-05	1.0186	0.0004019	1.0186	0.0004019	1.0186	0.0004019	1.0186	0.0004019	1.0186	0.0004019	0.011917	0.00013	0.0003319	1.1e-05	0.0001108	1.1e-05	0.0002038	6.9e-06	9.2e-05	1.8e-06	4.16003	6.13991	0.0472903	7.42395	12.479	14.626	24.683	3.99574	6.85151	2.16695	3.40278	1305.8	1922.42	64.7761	165.131
94242-39	ETH17-14C	2016-01-28	7.2	10	0.188624	0.002803	0.219486	0.0010001	0.0028097	0.0001704	5.66e-05	5.25e-05	0.0003851	4.3e-05	1.0186	0.0004019	1.0186	0.0004019	1.0186	0.0004019	1.0186	0.0004019	1.0186	0.0004019	0.011917	0.00013	0.0003319	1.1e-05	0.0001108	1.1e-05	0.0002038	6.9e-06	9.2e-05	1.8e-06	0.0017533	0.0001961	0.032217	0.0023555	0.0022252	0.0041778	0.0043613	0.0007555	0.0023423	0.012791	0.000807	0.858713	0.0143501	0.334712	0.06012
94242-40	ETH17-14C	2016-01-28	13.0833	10	1.08563	0.004202	0.102885	0.0003302	0.0016321	0.0001803	0.0001719	9.13e-05	0.003505	6.7e-05	1.0186	0.0004019	1.0186	0.0004019	1.0186	0.0004019	1.0186	0.0004019	1.0186	0.0004019	0.011917	0.00013	0.0003319	1.1e-05	0.0001108	1.1e-05	0.0002038	6.9e-06	9.2e-05	1.8e-06	0.0340405	0.0006611	0.0117701	0.0153432	0.008299	0.0296339	0.0162662	-0.0080229	0.0052835	0.0158512	0.001818	10.5436	0.0567996	0.380791	0.199917
94242-41	ETH17-14C	2016-01-28	15.9833	10	0.0613267	0.0013065	0.0992473	0.0002902	0.0019247	0.0001604	3.29e-05	4.06e-05	6.71e-05	3.5e-05	1.0186	0.0004019	1.0186	0.0004019	1.0186	0.0004019	1.0186	0.0004019	1.0186	0.0004019	0.011917	0.00013	0.0003319	1.1e-05	0.0001108	1.1e-05	0.0002038	6.9e-06	9.2e-05	1.8e-06	0.0006758	0.0003528	0.111015	0.0030549	0.0038355	0.0055486	0.0075177	0.0204467	0.0048641	0.0193776	0.0016764	0.617429	0.01429	0.415561	0.106305
94242-42	ETH17-14C	2016-01-28	18.7833	10	0.0967193	0.0013065	0.13354	0.0003402	0.0013728	0.0001504	1.28e-05	5.64e-05	0.0002554	3.3e-05	1.0186	0.0004019	1.0186	0.0004019	1.0186	0.0004019	1.0186	0.0004019	1.0186	0.0004019	0.011917	0.00013	0.0003319	1.1e-05	0.0001108	1.1e-05	0.0002038	6.9e-06	9.2e-05	1.8e-06	0.0019112	0.0002473	0.0091234	0.000882	0.0039717	0.0012896	0.0077844	-0.0066372	0.0033904	0.0102717	0.001168	0.723698	0.0107064	0.152295	0.0745873
94242-43	ETH17-14C	2016-01-28	21.6167	10	0.0303291	0.0009489	0.0562625	0.0004101	0.0005563	0.0001205	0.0002301	4.36e-05	7.43e-05	2.91e-05	1.0186	0.0004019	1.0186	0.0004019	1.0186	0.0004019	1.0186	0.0004019	1.0186	0.0004019	0.011917	0.00013	0.0003319	1.1e-05	0.0001108	1.1e-05	0.0002038	6.9e-06	9.2e-05	1.8e-06	0.0013199	0.0005161	0.755116	0.0378346	0.0072989	0.0737186	0.0143064	-0.0074473	0.006452	0.0098795	0.0022218	0.538638	0.0186124	0.146674	0.155145
94242-44	ETH17-14C	2016-01-29	0.45	10	0.0377274	0.0010084	0.0449696	0.0002203	-6.72e-05	0.0002003	0.0002521	0.0001002	7.86e-05	2.81e-05	1.0186	0.0004019	1.0186	0.0004019	1.0186	0.0004019	1.0186	0.0004019	1.0186	0.0004019	0.011917	0.00013	0.0003319	1.1e-05	0.0001108	1.1e-05	0.0002038	6.9e-06	9.2e-05	1.8e-06	0.0017469	0.0006235	0.78517	0.0519831	0.0210526	0.101451	0.0412648	-0.0406642	0.0133998	-0.0014938	0.0046178	0.838286	0.0245106	0.319327	0.187719
94242-45	ETH17-14C	2016-01-29	3.28333	10	0.0436896	0.0009787	0.0671453	0.0005001	0.000658	0.0001105	0.0002735	5.34e-05	6.65e-05	2.41e-05	1.0186	0.0004019	1.0186	0.0004019	1.0186	0.0004019	1.0186	0.0004019	1.0186	0.0004019	0.011917	0.00013	0.0003319	1.1e-05	0.0001108	1.1e-05	0.0002038	6.9e-06	9.2e-05	1.8e-06	0.0009899	0.0003582	1.00744	0.0378566	0.0075408	0.0737619	0.0147806	-0.0075229	0.0049623	0.0097912	0.0017086	0.650156	0.0164945	0.356724	0.10812
[truncated: 30 more columns]

## Sheet: Table S4
Table S4. 40Ar/39Ar air standards
Run_ID	Run_Date	Run_Hour	Ar40_	Ar40_Er	Ar38_	Ar38_Er	Ar36_	Ar36_Er	Ar40_Bkgd	Ar40_BkgdEr	Ar38_Bkgd	Ar38_BkgdEr	Ar36_Bkgd	Ar36_BkgdEr	Uncor 40/36	Uncor 40/36 Er	Uncor 40/38	Uncor 40/38 Er	D 40/36	D 40/36 Er	D 40/38	D 40/38 Er
A1/2-5660	2016-01-29	6.68333	3.27263	0.0073022	0.0023324	0.0001109	0.0114141	0.00015	0.011695	0.00018	9.86e-05	1.4e-05	7.19e-05	3.3e-06	286.718	3.82278	1403.12	66.7805	1.01018	0.0033715	1.06235	0.0252847
A1/2-5659	2016-01-29	4.78333	3.24824	0.0065013	0.0021772	0.0001305	0.01197	0.00012	0.011917	0.00013	0.0001108	1.1e-05	9.2e-05	1.8e-06	271.365	2.77443	1491.94	89.4513	1.02419	0.0026212	1.03023	0.0308892
A1/2-5658	2016-01-29	1.93333	3.28268	0.0120007	0.0024512	0.0001205	0.011661	0.00015	0.011917	0.00013	0.0001108	1.1e-05	9.2e-05	1.8e-06	281.509	3.76481	1339.21	66.0187	1.01483	0.0033973	1.0874	0.0268066
A1/2-5657	2016-01-28	23.1167	3.28178	0.0130006	0.0019872	0.0001305	0.011818	0.00014	0.011917	0.00013	0.0001108	1.1e-05	9.2e-05	1.8e-06	277.693	3.46896	1651.46	108.62	1.0183	0.0031842	0.979205	0.0322069
A1/2-5656	2016-01-28	20.2667	3.25629	0.0062014	0.0019972	0.0001205	0.011415	0.00014	0.011917	0.00013	0.0001108	1.1e-05	9.2e-05	1.8e-06	285.264	3.54084	1630.43	98.4226	1.01147	0.0031427	0.985501	0.0297499
A1/2-5655	2016-01-28	17.45	3.25656	0.0080011	0.0020922	0.0001105	0.011858	0.00015	0.011917	0.00013	0.0001108	1.1e-05	9.2e-05	1.8e-06	274.63	3.53914	1556.53	82.3333	1.02113	0.003294	1.00863	0.02668
A1/2-5654	2016-01-28	14.6333	3.26229	0.0067013	0.0022852	0.0001205	0.01169	0.00014	0.011917	0.00013	0.0001108	1.1e-05	9.2e-05	1.8e-06	279.067	3.39119	1427.57	75.3359	1.01704	0.0030937	1.0532	0.027794
A1/2-5653	2016-01-28	8.75	3.25333	0.0067013	0.0026432	0.0001604	0.01181	0.00016	0.011917	0.00013	0.0001108	1.1e-05	9.2e-05	1.8e-06	275.472	3.77517	1230.83	74.7244	1.02035	0.0035003	1.13427	0.0344364
A1/2-5652	2016-01-28	5.86667	3.23424	0.0077011	0.0022122	0.0001305	0.011762	0.00014	0.011917	0.00013	0.0001108	1.1e-05	9.2e-05	1.8e-06	274.973	3.33804	1462	86.2919	1.02081	0.003102	1.04073	0.0307181
A1/2-5651	2016-01-28	3.1	3.25443	0.0059014	0.0023862	0.0001205	0.011863	0.00012	0.011917	0.00013	0.0001108	1.1e-05	9.2e-05	1.8e-06	274.334	2.81956	1363.86	68.9191	1.02141	0.0026278	1.07753	0.0272293
A1/2-5650	2016-01-28	0.25	3.25066	0.0068012	0.0022272	0.0001305	0.011518	0.00014	0.011917	0.00013	0.0001108	1.1e-05	9.2e-05	1.8e-06	282.224	3.48113	1459.53	85.5506	1.01418	0.0031314	1.04161	0.0305317
A1/2-5649	2016-01-27	21.4167	3.25059	0.0056015	0.0020759	0.0001006	0.011206	0.00014	0.011917	0.00013	0.0001108	1.1e-05	9.2e-05	1.8e-06	290.076	3.65861	1565.87	75.9339	1.00724	0.00318	1.00561	0.0243863
A1/2-5648	2016-01-27	18.65	3.26684	0.0068012	0.0023506	9.56e-05	0.011816	0.00015	0.011917	0.00013	0.0001108	1.1e-05	9.2e-05	1.8e-06	276.476	3.55689	1389.79	56.618	1.01942	0.0032829	1.06743	0.021746
A1/2-5647	2016-01-27	15.85	3.2867	0.0076011	0.0020832	0.0001305	0.01193	0.00015	0.011917	0.00013	0.0001108	1.1e-05	9.2e-05	1.8e-06	275.498	3.52229	1577.72	98.8751	1.02033	0.0032654	1.00183	0.0313969
A1/2-5646	2016-01-27	13.1167	3.28666	0.0064013	0.0020612	0.0001006	0.011791	0.00014	0.011917	0.00013	0.0001108	1.1e-05	9.2e-05	1.8e-06	278.743	3.35414	1594.54	77.8883	1.01734	0.0030643	0.996532	0.0243424
A1/2-5645	2016-01-27	10.3	3.26808	0.0130006	0.0018464	9.56e-05	0.011763	0.00015	0.011917	0.00013	0.0001108	1.1e-05	9.2e-05	1.8e-06	277.827	3.71143	1769.98	91.9463	1.01818	0.0034048	0.945849	0.0245711
A1/2-5644	2016-01-27	7.55	3.24545	0.0072012	0.0022132	0.0001404	0.011512	0.00015	0.011917	0.00013	0.0001108	1.1e-05	9.2e-05	1.8e-06	281.919	3.7265	1466.41	93.103	1.01446	0.0033567	1.03916	0.0329935
A1/2-5643	2016-01-27	4.8	3.28078	0.0130006	0.0020712	0.0001305	0.010825	0.00014	0.011917	0.00013	0.0001108	1.1e-05	9.2e-05	1.8e-06	303.074	4.09983	1584	99.9732	0.996251	0.0033735	0.999842	0.0315569
A1/2-5642	2016-01-27	1.98333	3.28348	0.0140006	0.0022442	0.0001704	0.011895	0.00013	0.011917	0.00013	0.0001108	1.1e-05	9.2e-05	1.8e-06	276.038	3.23855	1463.1	111.238	1.01983	0.002995	1.04034	0.0395539
A1/2-5641	2016-01-26	23.1833	3.26471	0.0073012	0.0020422	0.0001305	0.011784	0.00014	0.011917	0.00013	0.0001108	1.1e-05	9.2e-05	1.8e-06	277.046	3.34952	1598.63	102.19	1.0189	0.0030836	0.995257	0.0318149
A1/2-5640	2016-01-26	20.3833	3.25215	0.0064013	0.0021632	0.0001504	0.011775	0.00014	0.011917	0.00013	0.0001108	1.1e-05	9.2e-05	1.8e-06	276.191	3.32876	1503.4	104.57	1.01969	0.0030763	1.0263	0.0356978
A1/2-5639	2016-01-26	17.5833	3.30494	0.0066013	0.0022461	0.0001006	0.012198	0.00013	0.011917	0.00013	0.0001108	1.1e-05	9.2e-05	1.8e-06	270.941	2.93809	1471.41	65.9704	1.0246	0.0027812	1.0374	0.0232591
A1/2-5638	2016-01-26	14.7333	3.27333	0.0066013	0.0021422	0.0001105	0.011631	0.00014	0.011917	0.00013	0.0001108	1.1e-05	9.2e-05	1.8e-06	281.431	3.43502	1528.02	78.9142	1.0149	0.0031008	1.01799	0.0262909
A1/2-5637	2016-01-26	11.3	3.2981	0.0075011	0.0025692	0.0001305	0.011762	0.00013	0.011917	0.00013	0.0001108	1.1e-05	9.2e-05	1.8e-06	280.403	3.16439	1283.71	65.2523	1.01583	0.0028696	1.11066	0.0282324
A1/2-5636	2016-01-26	1.4	3.32667	0.0066013	0.0023392	0.0001305	0.011968	0.00013	0.011917	0.00013	0.0001108	1.1e-05	9.2e-05	1.8e-06	277.964	3.06957	1422.14	79.3675	1.01805	0.0028142	1.05522	0.0294494
A1/2-5635	2016-01-25	22.6	3.30644	0.0080011	0.0026292	0.0001404	0.012591	0.00014	0.011917	0.00013	0.0001108	1.1e-05	9.2e-05	1.8e-06	262.603	2.98848	1257.59	67.2394	1.03264	0.0029417	1.12214	0.0300033
A1/2-5634	2016-01-25	19.7833	3.34722	0.0071012	0.0025242	0.0001404	0.011528	0.00014	0.011917	0.00013	0.0001108	1.1e-05	9.2e-05	1.8e-06	290.355	3.57986	1326.05	73.8273	1.007	0.0031078	1.09278	0.0304247
A1/2-5633	2016-01-25	17.0333	3.33167	0.0067013	0.0021702	0.0002602	0.01221	0.00015	0.011917	0.00013	0.0001108	1.1e-05	9.2e-05	1.8e-06	272.864	3.397	1535.19	184.113	1.02278	0.0031873	1.01561	0.0609098
A1/2-5632	2016-01-25	14.2	3.35667	0.0068012	0.0020962	0.0001404	0.011382	0.00014	0.011917	0.00013	0.0001108	1.1e-05	9.2e-05	1.8e-06	294.91	3.67661	1601.31	107.326	1.00308	0.0031303	0.994421	0.03333
A1/2-5631	2016-01-25	11.4	3.33379	0.0065013	0.0023192	0.0001604	0.012044	0.00014	0.011917	0.00013	0.0001108	1.1e-05	9.2e-05	1.8e-06	276.801	3.26277	1437.47	99.444	1.01912	0.003007	1.04957	0.0363099
A1/2-5630	2016-01-25	8.55	3.37538	0.0130006	0.0022692	0.0001305	0.012534	0.00015	0.011917	0.00013	0.0001108	1.1e-05	9.2e-05	1.8e-06	269.298	3.38582	1487.48	85.7121	1.02616	0.0032295	1.03178	0.0297313
A1/2-5629	2016-01-25	5.73333	3.39578	0.0140006	0.0017782	0.0002103	0.012014	0.00014	0.011917	0.00013	0.0001108	1.1e-05	9.2e-05	1.8e-06	282.652	3.49409	1909.67	225.973	1.0138	0.0031371	0.910591	0.0538835
A1/2-5628	2016-01-25	2.91667	3.3553	0.0062014	0.0021263	0.0001006	0.011683	0.00014	0.011917	0.00013	0.0001108	1.1e-05	9.2e-05	1.8e-06	287.195	3.48249	1578	74.718	1.00976	0.003065	1.00174	0.0237197
A1/2-5627	2016-01-25	0.0833333	3.39871	0.0073012	0.0025232	0.0001504	0.01212	0.00014	0.011917	0.00013	0.0001108	1.1e-05	9.2e-05	1.8e-06	280.421	3.29499	1346.98	80.3432	1.01581	0.0029878	1.08426	0.0323411
A1/2-5626	2016-01-24	21.3	3.34555	0.008301	0.0019812	0.0002602	0.011993	0.00013	0.011917	0.00013	0.0001108	1.1e-05	9.2e-05	1.8e-06	278.958	3.1023	1688.65	221.845	1.01714	0.0028315	0.968361	0.0636185
A1/2-5625	2016-01-24	18.5	3.37436	0.0073012	0.0024132	0.0001205	0.012287	0.00015	0.011917	0.00013	0.0001108	1.1e-05	9.2e-05	1.8e-06	274.628	3.40515	1398.29	69.8893	1.02113	0.0031693	1.06418	0.0265988
A1/2-5624	2016-01-24	15.6667	3.37046	0.0057015	0.0020622	0.0001604	0.011764	0.00016	0.011917	0.00013	0.0001108	1.1e-05	9.2e-05	1.8e-06	286.506	3.92698	1634.4	127.138	1.01037	0.0034666	0.984303	0.0382895
A1/2-5623	2016-01-24	11.35	3.37218	0.0078011	0.0019842	0.0001604	0.012067	0.00016	0.011917	0.00013	0.0001108	1.1e-05	9.2e-05	1.8e-06	279.454	3.76157	1699.52	137.424	1.01669	0.0034256	0.965259	0.0390315
A1/2-5622	2016-01-24	8.55	3.4098	0.0075011	0.0019272	0.0001205	0.012054	0.00014	0.011917	0.00013	0.0001108	1.1e-05	9.2e-05	1.8e-06	282.877	3.34412	1769.3	110.699	1.0136	0.0029995	0.946028	0.0295992
A1/2-5621	2016-01-24	5.75	3.36008	0.0064013	0.0022462	0.0001305	0.012113	0.00016	0.011917	0.00013	0.0001108	1.1e-05	9.2e-05	1.8e-06	277.394	3.70222	1495.9	86.9319	1.01858	0.0034029	1.02887	0.0299001
A1/2-5620	2016-01-24	2.91667	3.38158	0.0076011	0.0024702	0.0001504	0.012234	0.00017	0.011917	0.00013	0.0001108	1.1e-05	9.2e-05	1.8e-06	276.408	3.89102	1368.95	83.4079	1.01948	0.0035924	1.07552	0.0327699
A1/2-5619	2016-01-24	0.05	3.40759	0.0077011	0.0021682	0.0001704	0.012316	0.00017	0.011917	0.00013	0.0001108	1.1e-05	9.2e-05	1.8e-06	276.68	3.87012	1571.62	123.534	1.01923	0.0035687	1.00377	0.0394554
A1/2-5618	2016-01-23	21.2167	3.40804	0.0065013	0.0024422	0.0001305	0.012554	0.00015	0.011917	0.00013	0.0001108	1.1e-05	9.2e-05	1.8e-06	271.47	3.28494	1395.48	74.5954	1.0241	0.003102	1.06525	0.0284757
A1/2-5617	2016-01-23	18.3833	3.38429	0.0074011	0.0019702	0.0001404	0.012845	0.00014	0.011917	0.00013	0.0001108	1.1e-05	9.2e-05	1.8e-06	263.471	2.92908	1717.74	122.494	1.03179	0.0028713	0.960125	0.034239
A1/2-5616	2016-01-23	15.55	3.42834	0.0073012	0.0025672	0.0001504	0.012492	0.00013	0.011917	0.00013	0.0001108	1.1e-05	9.2e-05	1.8e-06	274.443	2.91548	1335.44	78.2902	1.02131	0.0027159	1.08894	0.0319242
A1/2-5615	2016-01-23	12.7667	3.42085	0.0064013	0.0017602	0.0002502	0.012289	0.00013	0.011917	0.00013	0.0001108	1.1e-05	9.2e-05	1.8e-06	278.367	2.99071	1943.45	276.317	1.01768	0.0027369	0.902643	0.0641781
A1/2-5614	2016-01-23	9.93333	3.41378	0.0073012	0.0023472	0.0001105	0.012585	0.00016	0.011917	0.00013	0.0001108	1.1e-05	9.2e-05	1.8e-06	271.258	3.49731	1454.41	68.5704	1.0243	0.0033058	1.04344	0.0246011
A1/2-5613	2016-01-23	7.15	3.56778	0.0160005	0.0029742	0.0002303	0.01258	0.00015	0.011917	0.00013	0.0001108	1.1e-05	9.2e-05	1.8e-06	283.607	3.61315	1199.58	93.0271	1.01294	0.0032303	1.14896	0.0445574
A1/2-5612	2016-01-23	4.26667	3.61948	0.0150006	0.0026502	0.0001305	0.012902	0.00015	0.011917	0.00013	0.0001108	1.1e-05	9.2e-05	1.8e-06	280.536	3.46279	1365.74	67.4707	1.01571	0.0031383	1.07679	0.0266019
A1/2-5611	2016-01-23	1.41667	3.80488	0.0150006	0.0027632	0.0001305	0.013642	0.00014	0.011917	0.00013	0.0001108	1.1e-05	9.2e-05	1.8e-06	278.909	3.06644	1376.98	65.2406	1.01719	0.0027994	1.07238	0.0254082
A1/2-5610	2016-01-22	22.55	3.3955	0.0070012	0.0021372	0.0002502	0.012624	0.00015	0.011917	0.00013	0.0001108	1.1e-05	9.2e-05	1.8e-06	268.972	3.24394	1588.76	186.055	1.02647	0.0030989	0.998342	0.0584651
A1/2-5609	2016-01-22	19.7	3.31785	0.0071012	0.0022602	0.0001704	0.012513	0.00015	0.011917	0.00013	0.0001108	1.1e-05	9.2e-05	1.8e-06	265.152	3.229	1467.95	110.686	1.03015	0.0031403	1.03862	0.039163
A1/2-5608	2016-01-22	16.9	3.30534	0.0074011	0.0019342	0.0001404	0.012076	0.00016	0.011917	0.00013	0.0001108	1.1e-05	9.2e-05	1.8e-06	273.711	3.67816	1708.89	124.132	1.02199	0.0034378	0.962607	0.0349666
A1/2-5607	2016-01-22	14.0667	3.27948	0.0130006	0.0026382	0.0001803	0.011965	0.00015	0.011917	0.00013	0.0001108	1.1e-05	9.2e-05	1.8e-06	274.089	3.60407	1243.08	85.114	1.02164	0.0033627	1.12867	0.0386462
A1/2-5606	2016-01-22	9.51667	3.40298	0.0140006	0.0019662	0.0001305	0.01268	0.00017	0.011917	0.00013	0.0001108	1.1e-05	9.2e-05	1.8e-06	268.374	3.76386	1730.74	115.061	1.02704	0.0036056	0.956511	0.0317997
A1/2-5605	2016-01-22	6.61667	3.35809	0.0073012	0.0020652	0.0001704	0.01243	0.00016	0.011917	0.00013	0.0001108	1.1e-05	9.2e-05	1.8e-06	270.16	3.52699	1626.04	134.176	1.02534	0.0033508	0.986831	0.0407214
A1/2-5604	2016-01-22	3.73333	3.43808	0.0140006	0.0024752	0.0003002	0.011889	0.00015	0.011917	0.00013	0.0001108	1.1e-05	9.2e-05	1.8e-06	289.181	3.8341	1389.01	168.56	1.00802	0.0033455	1.06773	0.0647952
A1/2-5603	2016-01-22	0.9	3.38689	0.008401	0.0022842	0.0001404	0.01247	0.00014	0.011917	0.00013	0.0001108	1.1e-05	9.2e-05	1.8e-06	271.603	3.12305	1482.75	91.2328	1.02397	0.0029473	1.03342	0.0317977
A1/2-5602	2016-01-21	22.0667	3.36272	0.0076011	0.0020752	0.0001305	0.012167	0.00015	0.011917	0.00013	0.0001108	1.1e-05	9.2e-05	1.8e-06	276.38	3.46437	1620.43	101.94	1.01951	0.0031989	0.988537	0.0310986
A1/2-5601	2016-01-21	19.2	3.39783	0.0068012	0.0021042	0.0001305	0.012144	0.00015	0.011917	0.00013	0.0001108	1.1e-05	9.2e-05	1.8e-06	279.795	3.50129	1614.79	100.172	1.01638	0.0031838	0.990264	0.0307198
A1/2-5600	2016-01-21	16.3667	3.43923	0.0070012	0.0026412	0.0001404	0.012531	0.00016	0.011917	0.00013	0.0001108	1.1e-05	9.2e-05	1.8e-06	274.457	3.54884	1302.15	69.2854	1.02129	0.0033056	1.10277	0.0293428
A1/2-5599	2016-01-21	13.4333	3.51108	0.0120007	0.0028912	0.0001404	0.012492	0.00015	0.011917	0.00013	0.0001108	1.1e-05	9.2e-05	1.8e-06	281.066	3.50924	1214.4	59.1319	1.01523	0.003173	1.14192	0.0278055
A1/2-5598	2016-01-21	10.5667	4.55798	0.0160005	0.0021882	0.0003002	0.015382	0.00015	0.011917	0.00013	0.0001108	1.1e-05	9.2e-05	1.8e-06	296.319	3.07132	2082.98	285.86	1.00189	0.0025994	0.871881	0.0598357
A1/2-5597	2016-01-21	7.76667	3.43532	0.0072012	0.0024492	0.0001105	0.011906	0.00014	0.011917	0.00013	0.0001108	1.1e-05	9.2e-05	1.8e-06	288.537	3.4466	1402.63	63.3783	1.00859	0.0030158	1.06253	0.024009
A1/2-5596	2016-01-21	4.93333	3.50567	0.0079011	0.0018412	0.0002902	0.012634	0.00015	0.011917	0.00013	0.0001108	1.1e-05	9.2e-05	1.8e-06	277.479	3.35349	1904.02	300.14	1.0185	0.0030812	0.911943	0.071888
A1/2-5595	2016-01-21	2.1	3.44648	0.0120007	0.0026182	0.0001205	0.012236	0.00015	0.011917	0.00013	0.0001108	1.1e-05	9.2e-05	1.8e-06	281.667	3.58975	1316.36	60.7587	1.01469	0.0032371	1.0968	0.0253162
A1/2-5594	2016-01-20	23.2833	3.49281	0.0076011	0.0021952	0.0001404	0.012391	0.00015	0.011917	0.00013	0.0001108	1.1e-05	9.2e-05	1.8e-06	281.883	3.46728	1591.11	101.846	1.01449	0.0031237	0.997604	0.0319326
A1/2-5593	2016-01-20	20.45	3.51422	0.008201	0.0018822	0.0003002	0.012659	0.00014	0.011917	0.00013	0.0001108	1.1e-05	9.2e-05	1.8e-06	277.606	3.13799	1867.08	297.822	1.01838	0.0028816	0.92092	0.07346
A1/2-5592	2016-01-20	16.9833	3.49488	0.0067013	0.0026992	0.0001604	0.01245	0.00016	0.011917	0.00013	0.0001108	1.1e-05	9.2e-05	1.8e-06	280.713	3.64771	1294.79	76.972	1.01555	0.0033033	1.1059	0.0328766
A1/2-5591	2016-01-20	14.1333	3.42166	0.0068012	0.0023132	0.0001105	0.012545	0.00017	0.011917	0.00013	0.0001108	1.1e-05	9.2e-05	1.8e-06	272.751	3.73585	1479.19	70.7521	1.02289	0.0035071	1.03466	0.0247486
A1/2-5590	2016-01-20	11.2667	3.50048	0.0130006	0.0019372	0.0001704	0.012696	0.00015	0.011917	0.00013	0.0001108	1.1e-05	9.2e-05	1.8e-06	275.715	3.41488	1806.98	159.046	1.02013	0.0031627	0.936112	0.0412033
A1/2-5589	2016-01-20	8.41667	3.48588	0.0078011	0.0025552	0.0001205	0.012715	0.00015	0.011917	0.00013	0.0001108	1.1e-05	9.2e-05	1.8e-06	274.155	3.29213	1364.23	64.4095	1.02158	0.0030708	1.07738	0.0254371
A1/2-5588	2016-01-20	5.61667	3.48238	0.0150006	0.0029632	0.0002003	0.012183	0.00015	0.011917	0.00013	0.0001108	1.1e-05	9.2e-05	1.8e-06	285.839	3.72872	1175.21	79.6014	1.01096	0.0033012	1.16081	0.0393189
A1/2-5587	2016-01-20	2.76667	3.46556	0.0077011	0.0024892	0.0001404	0.012708	0.00015	0.011917	0.00013	0.0001108	1.1e-05	9.2e-05	1.8e-06	272.707	3.27569	1392.24	78.6059	1.02293	0.0030757	1.06649	0.0301115
A1/2-5586	2016-01-19	23.95	3.47117	0.0076011	0.0024372	0.0001305	0.012447	0.00015	0.011917	0.00013	0.0001108	1.1e-05	9.2e-05	1.8e-06	278.876	3.41602	1424.25	76.3044	1.01722	0.003119	1.05444	0.0282501
A1/2-5585	2016-01-19	21.15	3.47576	0.008701	0.0025612	0.0001305	0.012611	0.00015	0.011917	0.00013	0.0001108	1.1e-05	9.2e-05	1.8e-06	275.613	3.35029	1357.08	69.2117	1.02022	0.0031043	1.08022	0.0275498
A1/2-5584	2016-01-19	18.3	3.48788	0.0120007	0.0020192	0.0001205	0.013041	0.00014	0.011917	0.00013	0.0001108	1.1e-05	9.2e-05	1.8e-06	267.455	3.01531	1727.36	103.258	1.02792	0.0029009	0.957447	0.0286213
A1/2-5583	2016-01-19	15.45	3.47154	0.008701	0.0026232	0.0001305	0.012761	0.00014	0.011917	0.00013	0.0001108	1.1e-05	9.2e-05	1.8e-06	272.043	3.06169	1323.4	65.9027	1.02356	0.0028836	1.09388	0.0272406
A1/2-5582	2016-01-19	12.5833	3.45993	0.0080011	0.0028252	0.0002303	0.012437	0.00014	0.011917	0.00013	0.0001108	1.1e-05	9.2e-05	1.8e-06	278.196	3.19723	1224.67	99.8546	1.01784	0.0029282	1.13712	0.0463653
A1/2-5581	2016-01-19	7.45	3.48474	0.0079011	0.0023162	0.0001404	0.012298	0.00015	0.011917	0.00013	0.0001108	1.1e-05	9.2e-05	1.8e-06	283.358	3.51559	1504.51	91.2823	1.01317	0.0031466	1.02592	0.0311272
A1/2-5580	2016-01-19	4.58333	3.437	0.0072012	0.0017522	0.0002303	0.012242	0.00014	0.011917	0.00013	0.0001108	1.1e-05	9.2e-05	1.8e-06	280.755	3.26442	1961.54	257.805	1.01551	0.0029557	0.898471	0.059052
A1/2-5579	2016-01-19	1.73333	3.38298	0.0130006	0.0027082	0.0001404	0.012503	0.00015	0.011917	0.00013	0.0001108	1.1e-05	9.2e-05	1.8e-06	270.573	3.40879	1249.16	64.9519	1.02494	0.0032323	1.12592	0.0292763
A1/2-5578	2016-01-18	22.8833	3.46466	0.0071012	0.0022352	0.0001205	0.012113	0.00015	0.011917	0.00013	0.0001108	1.1e-05	9.2e-05	1.8e-06	286.028	3.59043	1550.05	83.6258	1.01079	0.0031761	1.01073	0.0272689
A1/2-5577	2016-01-18	20.05	3.42777	0.0065013	0.0022522	0.0001504	0.012068	0.00014	0.011917	0.00013	0.0001108	1.1e-05	9.2e-05	1.8e-06	284.038	3.33911	1521.97	101.678	1.01256	0.0029797	1.02002	0.0340774
A1/2-5576	2016-01-18	17.2	3.45186	0.0062014	0.0024862	0.0001404	0.012496	0.00016	0.011917	0.00013	0.0001108	1.1e-05	9.2e-05	1.8e-06	276.237	3.57183	1388.41	78.4631	1.01964	0.0033003	1.06796	0.0301813
A1/2-5575	2016-01-18	14.4	3.4812	0.0073012	0.0027542	0.0001404	0.012556	0.00014	0.011917	0.00013	0.0001108	1.1e-05	9.2e-05	1.8e-06	277.254	3.14585	1263.96	64.5015	1.01871	0.0028934	1.11931	0.0285641
A1/2-5574	2016-01-18	11.5667	3.65788	0.0160005	0.0023652	0.0001105	0.013116	0.00015	0.011917	0.00013	0.0001108	1.1e-05	9.2e-05	1.8e-06	278.887	3.41501	1546.54	72.6008	1.01721	0.003118	1.01188	0.0237543
A1/2-5573	2016-01-18	8.71667	3.49287	0.0069012	0.0022622	0.0001105	0.012669	0.00015	0.011917	0.00013	0.0001108	1.1e-05	9.2e-05	1.8e-06	275.702	3.30966	1544.02	75.5142	1.02014	0.0030655	1.01271	0.0247683
A1/2-5572	2016-01-18	5.85	3.47648	0.0071012	0.0022162	0.0001604	0.012417	0.00016	0.011917	0.00013	0.0001108	1.1e-05	9.2e-05	1.8e-06	279.977	3.65293	1568.67	113.564	1.01622	0.0033189	1.00472	0.0363736
A1/2-5571	2016-01-18	2.96667	3.51188	0.0130006	0.0021072	0.0001305	0.012996	0.00016	0.011917	0.00013	0.0001108	1.1e-05	9.2e-05	1.8e-06	270.228	3.47424	1666.61	103.37	1.02527	0.0032996	0.974743	0.0302334
A1/2-5570	2016-01-18	0.0333333	3.49384	0.0078011	0.0022392	0.0001504	0.012758	0.00015	0.011917	0.00013	0.0001108	1.1e-05	9.2e-05	1.8e-06	273.855	3.27757	1560.31	104.861	1.02186	0.0030614	1.00741	0.0338565
A1/2-5569	2016-01-17	21.1833	3.50774	0.008401	0.0023492	0.0001604	0.013341	0.00015	0.011917	0.00013	0.0001108	1.1e-05	9.2e-05	1.8e-06	262.929	3.02278	1493.16	102	1.03232	0.0029708	1.02981	0.035179
A1/2-5568	2016-01-17	18.3	3.50709	0.0069012	0.0021202	0.0001404	0.012546	0.00015	0.011917	0.00013	0.0001108	1.1e-05	9.2e-05	1.8e-06	279.538	3.38736	1654.13	109.61	1.01662	0.0030837	0.978413	0.0324218
A1/2-5567	2016-01-17	14.6833	3.53799	0.0059014	0.0025422	0.0001305	0.012621	0.00013	0.011917	0.00013	0.0001108	1.1e-05	9.2e-05	1.8e-06	280.325	2.92532	1391.7	71.4594	1.0159	0.0026537	1.06669	0.0273897
A1/2-5566	2016-01-17	10.1833	3.54607	0.0076011	0.0023022	0.0001604	0.012881	0.00014	0.011917	0.00013	0.0001108	1.1e-05	9.2e-05	1.8e-06	275.294	3.04997	1540.3	107.352	1.02052	0.0028302	1.01393	0.0353386
A1/2-5565	2016-01-17	5.7	3.51697	0.0076011	0.0025092	0.0001205	0.012921	0.00016	0.011917	0.00013	0.0001108	1.1e-05	9.2e-05	1.8e-06	272.19	3.42167	1401.63	67.3808	1.02342	0.0032204	1.06291	0.0255525
A1/2-5564	2016-01-17	1.23333	3.54227	0.0067013	0.0022652	0.0001504	0.012321	0.00015	0.011917	0.00013	0.0001108	1.1e-05	9.2e-05	1.8e-06	287.498	3.54235	1563.78	103.873	1.0095	0.0031135	1.00629	0.0334258
A1/2-5563	2016-01-16	20.7667	3.54508	0.0150006	0.0025822	0.0001404	0.012447	0.00015	0.011917	0.00013	0.0001108	1.1e-05	9.2e-05	1.8e-06	284.814	3.63797	1372.89	74.8896	1.01187	0.0032353	1.07398	0.0292965
A1/2-5562	2016-01-16	16.3	3.57888	0.008301	0.0026732	0.0001504	0.012829	0.00014	0.011917	0.00013	0.0001108	1.1e-05	9.2e-05	1.8e-06	278.968	3.11256	1338.8	75.3892	1.01713	0.0028408	1.08757	0.0306256
A1/2-5561	2016-01-16	12.3667	3.58324	0.008501	0.0026822	0.0001504	0.012401	0.00015	0.011917	0.00013	0.0001108	1.1e-05	9.2e-05	1.8e-06	288.947	3.56188	1335.93	74.9788	1.00823	0.0031111	1.08874	0.030557
A1/2-5560	2016-01-16	11	3.66118	0.0170005	0.0017502	0.0002602	0.013144	0.00016	0.011917	0.00013	0.0001108	1.1e-05	9.2e-05	1.8e-06	278.544	3.62918	2091.87	311.186	1.01752	0.0033186	0.870028	0.0647223
A1/2-5559	2016-01-16	7.15	3.63982	0.0076206	0.0035201	0.0002333	0.0130197	0.0001501	0.018198	0.00056	0.0001169	3.9e-05	0.0001483	6.1e-06	279.563	3.27621	1034.01	68.5599	1.01659	0.0029822	1.23754	0.0410337
A1/2-5558	2016-01-16	3.36667	3.58856	0.0083189	0.0028881	0.0001453	0.0129657	0.0001501	0.018198	0.00056	0.0001169	3.9e-05	0.0001483	6.1e-06	276.774	3.26823	1242.53	62.5913	1.01915	0.0030125	1.12892	0.0284383
A1/2-5557	2016-01-15	23.5	3.63591	0.006823	0.0025661	0.000155	0.0130687	0.0001401	0.018198	0.00056	0.0001169	3.9e-05	0.0001483	6.1e-06	278.215	3.02858	1416.9	85.6192	1.01782	0.0027735	1.05716	0.0319455
A1/2-5556	2016-01-15	19.65	3.6448	0.0140112	0.0025931	0.0001262	0.0129077	0.0001501	0.018198	0.00056	0.0001169	3.9e-05	0.0001483	6.1e-06	282.374	3.45892	1405.58	68.6075	1.01405	0.0031093	1.06142	0.0259082
A1/2-5555	2016-01-15	14.1667	3.67259	0.0082191	0.0025471	0.0001842	0.0126357	0.0001501	0.018198	0.00056	0.0001169	3.9e-05	0.0001483	6.1e-06	290.652	3.51395	1441.87	104.309	1.00674	0.0030467	1.04797	0.0379123
A1/2-5554	2016-01-15	10.1833	3.5147	0.0120131	0.0030021	0.0002728	0.0123547	0.0001601	0.018198	0.00056	0.0001169	3.9e-05	0.0001483	6.1e-06	284.483	3.81295	1170.75	106.462	1.01216	0.0033959	1.16302	0.0528874
A1/2-5553	2016-01-14	14.4667	0.305642	0.0028555	0.0002201	0.0001167	0.0010427	5.14e-05	0.018198	0.00056	0.0001169	3.9e-05	0.0001483	6.1e-06	293.125	14.6968	1388.65	736.453	1.00461	0.0126084	1.06787	0.283207
A1/2-5552	2016-01-14	12.85	3.68918	0.0078201	0.0026851	0.000155	0.0132667	0.0001501	0.018198	0.00056	0.0001169	3.9e-05	0.0001483	6.1e-06	278.078	3.20143	1373.95	79.3592	1.01795	0.0029336	1.07357	0.0310093

## Sheet: Table S5
Table S5. 40Ar/39Ar blanks
Run_ID	Run_Date	Run_Hour	Ar40_Bkgd	Ar40_BkgdEr	Ar39_Bkgd	Ar39_BkgdEr	Ar38_Bkgd	Ar38_BkgdEr	Ar37_Bkgd	Ar37_BkgdEr	Ar36_Bkgd	Ar36_BkgdEr
B-27702	2016-01-14	12.2167	0.0171	0.0033	0.0012365	9.8e-05	0.000609	0.00016	0.0004128	6.8e-05	0.0001659	3.8e-05
B-27703	2016-01-14	13.8333	0.02031	0.0031	0.000755	0.00016	-0.000182	0.00022	0.0004717	0.0001	0.000138	3.4e-05
B-27704	2016-01-15	9.56667	0.01207	0.0016	0.000485	0.00014	0.000179	0.00011	-2.3e-05	0.00015	0.0001656	3.1e-05
B-27705	2016-01-15	10.9333	0.01469	0.0022	0.000503	0.00013	-3e-07	5.2e-05	0.0002704	7.3e-05	0.0001297	3.2e-05
B-27706	2016-01-15	13.5167	0.02432	0.0038	0.00084	0.00018	0.000111	0.00017	0.000415	5.2e-05	0.0002101	4e-05
B-27707	2016-01-15	15.9	0.01919	0.0031	0.000388	0.00019	6.4e-05	0.00014	0.0003828	6.5e-05	0.0001576	4.5e-05
B-27708	2016-01-15	16.8333	0.02981	0.0031	0.001547	0.00011	0.0002047	0.0001	0.0003697	8.5e-05	0.0001759	3.6e-05
B-27709	2016-01-15	17.4667	0.0234	0.0031	0.001104	0.00016	-3.5e-05	0.00032	0.0002642	3.7e-05	0.0001868	3.5e-05
B-27710	2016-01-15	19.0167	0.01817	0.0026	0.000835	0.00018	0.0003159	7e-05	0.0005695	0.0001	0.0002061	3.8e-05
B-27711	2016-01-15	21.3167	0.01777	0.003	0.000639	0.00015	9.65e-05	9.6e-05	0.0002574	7.2e-05	0.0001203	3.5e-05
B-27712	2016-01-15	22.85	0.02152	0.0024	0.000606	0.00015	0.0001372	7e-05	0.000272	6.3e-05	0.0001382	3.2e-05
B-27713	2016-01-16	1.18333	0.01491	0.0023	0.000769	0.00014	-7.5e-05	0.00013	0.0002635	6.6e-05	5.99e-05	3.2e-05
B-27714	2016-01-16	2.73333	0.01371	0.0025	0.0011457	7.6e-05	0.0001198	8.4e-05	0.0003174	6.3e-05	0.0001113	3.3e-05
B-27715	2016-01-16	5.03333	0.01238	0.0025	0.001501	0.00016	-0.000396	0.00024	0.0002776	7.7e-05	5.83e-05	3.1e-05
B-27716	2016-01-16	6.55	0.01789	0.0023	0.00044	0.00012	0.0001597	8.9e-05	0.0002862	6.5e-05	0.0001292	3.6e-05
B-27717	2016-01-16	8.83333	0.019	0.0025	0.000619	0.00016	0.0002169	9.8e-05	0.0003531	7.5e-05	0.0001721	3.2e-05
B-27718	2016-01-16	10.3833	0.0174	0.0023	0.000805	0.00015	0.0004056	7.8e-05	0.000545	8.8e-05	0.0001101	3.5e-05
B-27719	2016-01-16	11.7333	0.01939	0.003	0.0010122	9.3e-05	0.000215	0.00013	0.0002907	5.3e-05	0.0001676	3.6e-05
B-27720	2016-01-16	13.4	0.01696	0.0022	0.0005725	8e-05	0.0001189	8.9e-05	0.00038	7.5e-05	9.29e-05	3.2e-05
B-27721	2016-01-16	15.7	0.01808	0.0019	0.0007622	8.1e-05	-4.67e-05	9.5e-05	0.0003414	6.6e-05	0.0001821	3.4e-05
B-27722	2016-01-16	17.85	0.02238	0.0012	0.00031	0.00015	0.000113	8.3e-05	0.0003082	7e-05	8.33e-05	3.5e-05
B-27723	2016-01-16	20.1833	0.0133	0.0021	0.0006525	7.4e-05	0.0001612	6.1e-05	6.6e-05	0.00011	0.0001529	3.1e-05
B-27724	2016-01-16	22.3167	0.01545	0.002	0.000438	0.00016	0.0002413	0.0001	0.0002231	6.3e-05	0.0001169	2.9e-05
B-27725	2016-01-17	0.6	0.01801	0.002	0.000294	0.00013	0.000131	0.00017	0.0002977	5.7e-05	0.0001046	3e-05
B-27726	2016-01-17	2.78333	0.01556	0.0026	0.000354	0.00011	3.4e-05	6.7e-05	0.0003812	6.4e-05	5.01e-05	3.2e-05
B-27727	2016-01-17	5.08333	0.01016	0.0017	0.000261	0.00013	0.000292	0.00011	0.0002616	8.5e-05	0.0001372	3.2e-05
B-27728	2016-01-17	7.26667	0.01396	0.0019	0.0005701	6.4e-05	0.000194	0.00011	0.0003567	5.6e-05	0.0001614	3.1e-05
B-27729	2016-01-17	9.56667	0.01389	0.002	0.0004473	8.1e-05	5.9e-05	0.00013	3.3e-06	9.9e-05	0.0001338	3.2e-05
B-27730	2016-01-17	11.7333	0.01161	0.0018	0.0004021	7.2e-05	-6.5e-05	0.00017	0.000345	5.5e-05	7.5e-05	3.4e-05
B-27731	2016-01-17	14.0833	0.01554	0.0016	0.0006933	7.2e-05	0.0001568	8.1e-05	0.000439	5e-05	0.000144	3e-05
B-27732	2016-01-17	16.2167	0.02223	0.0021	0.0005167	7.9e-05	0.0002379	9.5e-05	0.0002079	8.7e-05	0.0001513	3e-05
B-27733	2016-01-17	17.7	0.01353	0.0021	0.000141	0.00015	5.5e-05	0.00012	0.0002687	7.1e-05	0.000109	3.1e-05
B-27734	2016-01-17	19.05	0.0147	0.0018	0.000522	0.00014	-0.000241	0.00016	0.0001798	4.8e-05	6.86e-05	2.8e-05
B-27735	2016-01-17	20.5667	0.01377	0.002	0.000888	0.00014	-0.000167	9.7e-05	0.0003101	4.6e-05	0.0001236	3.3e-05
B-27736	2016-01-17	21.9333	0.01278	0.0018	0.0006762	7.4e-05	4.22e-05	8.9e-05	0.0002486	5.5e-05	0.0001196	3.2e-05
B-27737	2016-01-17	23.4333	0.01458	0.0019	0.000604	0.00013	0.0001951	7.4e-05	0.0002757	5.5e-05	9.53e-05	3.3e-05
B-27738	2016-01-18	0.766667	0.01125	0.0022	0.0005195	7.7e-05	-3e-05	0.00012	0.0003815	5e-05	5.22e-05	3.2e-05
B-27739	2016-01-18	2.36667	0.01194	0.0017	0.0005546	6.5e-05	0.0002267	7.3e-05	0.0003491	5.5e-05	0.0001571	3.3e-05
B-27740	2016-01-18	3.71667	0.00998	0.0018	0.000356	0.00013	0.00038	0.00015	0.0002081	5.3e-05	3.31e-05	3.3e-05
B-27741	2016-01-18	5.25	0.01608	0.0021	0.0007558	7.3e-05	-0.000175	0.00017	0.0001726	4.9e-05	0.0001688	2.9e-05
B-27742	2016-01-18	6.6	0.00902	0.0024	0.0005621	7.6e-05	0.0002519	9.5e-05	0.0003338	3.8e-05	0.0001182	3.1e-05
B-27743	2016-01-18	8.11667	0.01372	0.0013	0.000349	0.00015	5.15e-05	7.3e-05	0.0005634	7.6e-05	5.98e-05	2.9e-05
B-27744	2016-01-18	9.45	0.00985	0.0025	0.000208	0.00013	0.0001258	7.7e-05	0.0001996	5.5e-05	7.79e-05	3.2e-05
B-27745	2016-01-18	10.95	0.01147	0.0014	0.000249	0.00012	4.1e-05	0.00014	0.0002892	5.1e-05	9.28e-05	2.7e-05
B-27746	2016-01-18	12.3167	0.01354	0.0026	0.000328	0.00014	0.000316	0.00015	0.0002224	7.4e-05	0.000151	3.5e-05
B-27747	2016-01-18	13.8167	0.0129	0.0018	0.0003665	7.3e-05	5.65e-05	7.6e-05	0.0002061	4.7e-05	0.0001228	2.7e-05
B-27748	2016-01-18	15.15	0.01478	0.0018	0.0006075	8e-05	-1.16e-05	5.6e-05	0.000122	0.00011	0.0001347	3.1e-05
B-27749	2016-01-18	16.6	0.00912	0.002	0.000368	0.00012	0.000278	0.00017	0.0002833	4.9e-05	0.0001466	2.6e-05
B-27750	2016-01-18	17.95	0.01038	0.002	-8e-05	0.00013	1.34e-05	9.9e-05	0.0002263	7.3e-05	3.56e-05	2.8e-05
B-27751	2016-01-18	19.45	0.01349	0.0018	0.000253	0.00014	-2.7e-05	5.5e-05	0.0002701	6.6e-05	0.0001029	3.2e-05
B-27752	2016-01-18	20.8	0.01223	0.0018	0.000417	0.00013	0.0002099	7.4e-05	0.0004355	4.5e-05	0.0001035	2.9e-05
B-27753	2016-01-18	22.2833	0.01286	0.0018	0.0005348	6.9e-05	8.39e-05	7.8e-05	0.0002698	8.1e-05	8.18e-05	3e-05
B-27754	2016-01-18	23.6333	0.01287	0.0024	0.0005212	8.4e-05	5.8e-05	9.8e-05	0.0003573	6.4e-05	0.0001362	3.1e-05
B-27755	2016-01-19	1.11667	0.01277	0.002	0.000346	0.00014	0.0004202	0.0001	0.0005176	9.1e-05	8.97e-05	2.9e-05
B-27756	2016-01-19	2.46667	0.01225	0.002	0.000396	0.00015	0.0001924	0.0001	0.000492	0.00012	0.0001116	3.1e-05
B-27757	2016-01-19	3.98333	0.01155	0.0019	0.000376	0.00013	0.000265	0.00011	1.2e-05	0.00012	0.0001002	3.3e-05
B-27758	2016-01-19	5.33333	0.0161	0.0016	0.000551	7.1e-05	6.36e-05	8.7e-05	0.0001624	5.3e-05	7.63e-05	3e-05
B-27759	2016-01-19	6.81667	0.01318	0.0015	0.0005012	6.6e-05	0.0004355	9.1e-05	0.0002579	5.8e-05	9.84e-05	2.6e-05
B-27760	2016-01-19	8.2	0.00824	0.0023	0.000166	0.00013	0.0001464	9.5e-05	0.0003481	6.9e-05	0.0001212	3.2e-05
B-27761	2016-01-19	9.71667	0.01315	0.0016	0.000394	0.00012	0.000311	0.00012	0.0003841	5.5e-05	0.0001853	2.9e-05
B-27762	2016-01-19	10.4833	0.01067	0.0016	0.000648	0.00013	0.000293	0.00016	0.0001566	6e-05	0.0001191	2.9e-05
B-27763	2016-01-19	11.9667	0.00967	0.0019	0.000406	0.00012	-0.000204	0.00015	0.0002795	5.3e-05	0.0001247	2.6e-05
B-27764	2016-01-19	13.3167	0.01248	0.0021	0.000103	0.00013	-0.000177	0.00011	0.000316	7.7e-05	6.59e-05	3e-05
B-27765	2016-01-19	14.85	0.0124	0.0015	0.00071	6.6e-05	9.4e-05	0.00011	0.0003588	4.5e-05	0.0001581	3.1e-05
B-27766	2016-01-19	16.1833	0.01011	0.0014	0.000251	0.00014	-0.000229	0.00021	0.000133	5.6e-05	6.35e-05	3.2e-05
B-27767	2016-01-19	17.6833	0.01941	0.0012	0.000402	0.00012	3.6e-05	0.00012	0.0002639	6e-05	0.0001379	3.1e-05
B-27768	2016-01-19	19.05	0.0091	0.0015	0.00034	0.00011	0.0001472	7.7e-05	0.0001511	7.1e-05	1.99e-05	2.7e-05
B-27769	2016-01-19	20.55	0.01133	0.0016	0.0004407	6.2e-05	-0.000177	0.00013	0.000571	0.00012	0.0001408	2.5e-05
B-27770	2016-01-19	21.9	0.01375	0.0016	0.000249	0.00012	0.0001333	8.4e-05	0.0002447	5.3e-05	4.41e-05	2.9e-05
B-27771	2016-01-19	23.3667	0.01338	0.0015	0.0005033	6.6e-05	0.000296	0.00016	0.0003179	7.5e-05	7.4e-06	2.8e-05
B-27772	2016-01-20	0.683333	0.01383	0.0016	0.000495	7e-05	-0.000122	0.00016	0.0002431	6.3e-05	0.0001088	2.9e-05
B-27773	2016-01-20	2.18333	0.01124	0.0014	0.0004181	7.1e-05	-3.7e-05	0.00012	0.0001931	6.1e-05	0.0001321	3e-05
B-27774	2016-01-20	3.5	0.01296	0.0021	0.000188	0.00013	0.000123	8.5e-05	0.0003385	6.6e-05	0.0001001	3.1e-05
B-27775	2016-01-20	5.03333	0.01056	0.0013	0.000203	0.00012	0.000242	0.00014	-3.1e-05	0.00011	0.0001119	2.8e-05
B-27776	2016-01-20	6.35	0.01233	0.0018	0.0004556	7.6e-05	8.18e-05	7e-05	0.0002553	7.1e-05	8.9e-05	2.8e-05
B-27777	2016-01-20	7.83333	0.01234	0.0014	0.0002717	6.7e-05	0.0001549	7.9e-05	0.0002473	8.3e-05	0.0001629	2.7e-05
B-27778	2016-01-20	9.16667	0.01477	0.0018	0.0003724	6.8e-05	8.4e-05	0.00013	0.0004355	9.9e-05	5.21e-05	2.9e-05
B-27779	2016-01-20	10.6667	0.01231	0.0013	0.0004646	6.5e-05	-0.000259	0.00017	0.0001826	4.5e-05	6.93e-05	2.8e-05
B-27780	2016-01-20	12.0167	0.00895	0.0017	0.0006743	7.6e-05	0.000205	0.00011	2.3e-05	0.00013	0.000106	3e-05
B-27781	2016-01-20	13.5333	0.01294	0.0013	0.000209	0.00011	4.4e-05	0.00012	0.000492	5.5e-05	9.03e-05	2.9e-05
B-27782	2016-01-20	14.8833	0.01153	0.0015	0.0004109	6.8e-05	0.0002492	0.0001	0.0002717	6e-05	0.0001164	3.2e-05
B-27783	2016-01-20	16.4	0.01096	0.0014	0.0004084	7.4e-05	-1.77e-05	8e-05	0.0001713	4.7e-05	9.45e-05	2.7e-05
B-27784	2016-01-20	17.7167	0.0097	0.0017	0.000463	0.00013	0.0003375	8.6e-05	0.0004337	6e-05	9.57e-05	3.5e-05
B-27785	2016-01-20	18.3667	0.01071	0.0016	0.000124	0.00011	0.0001517	0.0001	0.0001316	7.8e-05	0.0001071	3.3e-05
B-27786	2016-01-20	19.8667	0.01186	0.0013	0.0004719	7.4e-05	0.0001081	9.7e-05	0.0004716	0.0001	0.0001824	3.4e-05
B-27787	2016-01-20	21.2167	0.0109	0.0019	0.0003842	7.2e-05	0.000359	0.00019	0.0001913	4.8e-05	5.45e-05	3e-05
B-27788	2016-01-20	22.7	0.01017	0.0017	0.000391	0.00013	0.000676	0.00014	0.0002748	7e-05	0.0001253	2.9e-05
B-27789	2016-01-21	0.0166667	0.01421	0.0016	0.000181	0.00012	0.0002102	8.3e-05	0.0004419	8.8e-05	7.02e-05	3e-05
B-27790	2016-01-21	1.51667	0.01234	0.0017	0.0006004	7.6e-05	0.0002293	6.4e-05	0.000201	6.3e-05	1.18e-05	2.9e-05
B-27791	2016-01-21	2.85	0.01487	0.0018	8e-05	0.00013	1.12e-05	7.5e-05	0.0005599	7.2e-05	0.0001192	2.7e-05
B-27792	2016-01-21	4.35	0.01448	0.0012	0.000267	0.00012	0.0001002	6.1e-05	0.0002662	4.3e-05	6.65e-05	2.6e-05
B-27793	2016-01-21	5.68333	0.01071	0.0015	0.0004851	6.4e-05	0.0001283	9.1e-05	0.0001944	4.5e-05	3.92e-05	3.1e-05
B-27794	2016-01-21	7.18333	0.01276	0.0015	0.000419	0.00012	4.92e-05	0.0001	0.0001468	5.4e-05	0.0001244	2.9e-05
B-27795	2016-01-21	8.5	0.013	0.0017	0.00022	0.00013	0.000264	0.00012	0.0003284	7.2e-05	9.91e-05	3.3e-05
B-27796	2016-01-21	9.95	0.01092	0.0023	0.0003289	6.6e-05	0.000288	0.00011	8.49e-05	7.5e-05	7e-05	3.1e-05
B-27797	2016-01-21	11.3167	0.01015	0.0022	0.0006096	7.2e-05	0.000201	9.6e-05	0.0002707	6.5e-05	5.49e-05	3.1e-05
B-27798	2016-01-21	12.8333	0.00805	0.0023	0.000178	0.00015	0.0003653	0.0001	0.0002157	6.9e-05	1.15e-05	3.3e-05
B-27799	2016-01-21	14.1833	0.01295	0.002	0.0005169	6.9e-05	2.62e-05	9.1e-05	9.4e-05	0.00016	0.0001274	3.2e-05
B-27800	2016-01-21	15.7167	0.01158	0.0024	0.000263	0.00012	-8.7e-05	0.00012	0.0003381	8.7e-05	0.0001047	2.9e-05
B-27801	2016-01-21	17.1167	0.01564	0.002	0.000155	0.00012	0.000275	0.00016	0.0003994	6.4e-05	0.000183	3e-05
B-27802	2016-01-21	18.6	0.01339	0.0017	0.0004968	6.9e-05	8.97e-05	8.4e-05	-4.8e-05	0.00014	7.72e-05	3.1e-05
B-27803	2016-01-21	19.95	0.01328	0.002	9.4e-05	0.00014	0.0001407	9.3e-05	0.0003591	6.2e-05	0.0001031	3.2e-05
B-27804	2016-01-21	21.4667	0.0134	0.0016	0.000142	0.00013	2.15e-05	6.5e-05	0.0001841	6.1e-05	0.0001515	2.9e-05
B-27805	2016-01-21	22.8167	0.0132	0.0021	0.0004869	6e-05	-2.9e-06	6.2e-05	3.01e-05	8.7e-05	6.45e-05	2.9e-05
B-27806	2016-01-22	0.333333	0.01047	0.0016	0.000445	6.8e-05	0.0001187	9.7e-05	0.0001884	3.8e-05	6.84e-05	3.1e-05
B-27807	2016-01-22	1.65	0.01214	0.0015	0.0004847	6.3e-05	0.000387	0.00012	0.0002563	5e-05	8.52e-05	2.8e-05
B-27808	2016-01-22	3.15	0.00972	0.0019	0.0003609	5.2e-05	-8.65e-05	5.6e-05	0.0001965	5.5e-05	0.0001251	2.8e-05
B-27809	2016-01-22	4.48333	0.01685	0.0017	0.000282	0.00013	0.0003252	7.5e-05	0.0003261	9.4e-05	0.0001317	2.9e-05
B-27810	2016-01-22	6.01667	0.01209	0.0014	0.0004671	6.9e-05	0.0003957	0.0001	0.0002532	5.8e-05	6.38e-05	2.7e-05
B-27811	2016-01-22	7.36667	0.01428	0.002	0.0004973	7e-05	0.0001589	8.2e-05	0.0002655	5e-05	7.72e-05	3e-05
B-27812	2016-01-22	8.88333	0.0128	0.0016	0.0001885	0.0001	-0.000275	0.00016	0.0004963	8.7e-05	9.94e-05	3e-05
B-27813	2016-01-22	10.2667	0.01069	0.0017	0.0004078	7.6e-05	-6.4e-05	0.00013	0.00024	7.3e-05	0.0001525	2.9e-05
B-27814	2016-01-22	11.95	0.01101	0.002	0.0005065	6e-05	0.000156	0.00011	0.0002209	4.3e-05	0.0001303	3.1e-05
B-27815	2016-01-22	13.4667	0.0121	0.0019	0.000255	0.00013	0.0003172	8.5e-05	0.0002012	5.8e-05	2e-05	3.3e-05
B-27816	2016-01-22	14.8167	0.01801	0.0016	0.000302	0.00012	0.0002977	9.1e-05	3.98e-05	7.6e-05	6.42e-05	3.2e-05
B-27817	2016-01-22	16.2667	0.01645	0.0019	6.9e-05	0.00011	-1.27e-05	0.0001	0.0001893	3.5e-05	8.48e-05	2.9e-05
B-27818	2016-01-22	17.6333	0.01474	0.0017	0.000408	0.00012	0.000433	0.00023	0.0002875	4.1e-05	0.0001346	2.9e-05
B-27819	2016-01-22	19.1167	0.01305	0.0017	0.0006108	6.6e-05	9.89e-05	8.7e-05	0.000291	0.00013	0.0001318	2.9e-05
B-27820	2016-01-22	20.45	0.01659	0.0014	0.00018	0.00011	0.000104	0.00011	0.0003885	5.9e-05	0.0001041	2.5e-05
B-27821	2016-01-22	21.9333	0.01339	0.0017	0.0004423	6.5e-05	6.3e-05	0.00012	0.0002831	7.6e-05	9e-05	2.8e-05
B-27822	2016-01-22	23.3	0.01285	0.0017	0.000756	0.00013	-0.000355	0.00017	0.000204	4.7e-05	8.62e-05	3.2e-05
B-27823	2016-01-23	0.816667	0.01388	0.0016	0.000408	0.00012	0.0001402	0.0001	0.0002556	4.2e-05	5.79e-05	2.9e-05
B-27824	2016-01-23	2.15	0.01171	0.0017	0.000197	0.00012	0.0001282	7.2e-05	0.0002638	5.8e-05	0.0001365	3.2e-05
B-27825	2016-01-23	3.66667	0.0109	0.0016	0.000246	0.00011	0.0002919	6.9e-05	0.0002743	4.7e-05	9.99e-05	2.6e-05
B-27826	2016-01-23	5.01667	0.01185	0.0013	0.0001753	0.0001	0.0001083	8.7e-05	0.0001725	5.8e-05	8.97e-05	2.6e-05
B-27827	2016-01-23	6.53333	0.0132	0.0016	0.000226	0.00011	8.27e-05	6.1e-05	0.0003404	5.8e-05	8.3e-05	2.9e-05
B-27828	2016-01-23	7.88333	0.0117	0.0016	0.0005038	6.5e-05	0.0001045	5.9e-05	0.0002038	7.8e-05	8.75e-05	2.5e-05
B-27829	2016-01-23	9.35	0.01264	0.0011	0.0004519	5.7e-05	0.0002447	8.7e-05	0.000332	8.1e-05	0.0001211	2.8e-05
B-27830	2016-01-23	10.6833	0.01069	0.0014	0.0006191	6.5e-05	0.0003	0.00013	0.000705	0.00012	8.05e-05	2.7e-05
B-27831	2016-01-23	12.1833	0.01142	0.0013	0.0002577	6.3e-05	0.0001265	7.6e-05	0.0003779	7e-05	0.0001083	3e-05
B-27832	2016-01-23	13.5	0.01291	0.0015	0.0004341	6.1e-05	0.000384	0.00014	0.0005236	8e-05	6.59e-05	2.8e-05
B-27833	2016-01-23	14.9833	0.01137	0.0012	0.0004583	5.8e-05	-1.33e-05	9.7e-05	0.0001581	4.6e-05	6.02e-05	2.6e-05
B-27834	2016-01-23	16.2833	0.01409	0.0016	2.09e-05	0.0001	-9.33e-05	8.4e-05	0.000202	4.7e-05	0.0001104	2.8e-05
B-27835	2016-01-23	17.8	0.01539	0.0014	-3.8e-05	0.00012	0.000358	0.00012	0.0006107	0.0001	7.88e-05	2.7e-05
B-27836	2016-01-23	19.1333	0.01318	0.0014	0.0004469	5.8e-05	0.0002223	6e-05	0.0003795	3.9e-05	9.7e-05	2.6e-05
B-27837	2016-01-23	20.6167	0.01104	0.0012	0.0004507	6.3e-05	-3.9e-05	0.00022	0.0003374	6.9e-05	7.5e-05	2.9e-05
B-27838	2016-01-23	21.95	0.01361	0.0016	0.000334	0.00011	0.0001521	9e-05	0.0002237	7.4e-05	4.35e-05	2.6e-05
B-27839	2016-01-23	23.45	0.01198	0.0013	0.0002934	5.7e-05	0.000205	0.00011	0.0001788	6.1e-05	6.6e-05	2.7e-05
B-27840	2016-01-24	0.8	0.01215	0.0013	0.0001525	9.7e-05	0.00032	0.00013	0.00023	0.00012	0.0001128	2.8e-05
B-27841	2016-01-24	2.33333	0.01298	0.0013	0.000173	0.00011	2.4e-05	0.00017	0.0001882	4.7e-05	8.28e-05	2.8e-05
B-27842	2016-01-24	3.66667	0.00894	0.0012	0.000348	0.00012	0.0001721	6.8e-05	0.0001608	4.4e-05	5.96e-05	2.7e-05
B-27843	2016-01-24	5.16667	0.0107	0.001	0.000155	0.00012	-0.000301	0.00014	5.3e-05	0.00012	0.0001195	2.7e-05
B-27844	2016-01-24	6.5	0.01062	0.0014	0.000124	0.00011	0.0002302	7e-05	0.0003002	6e-05	3.66e-05	2.9e-05
B-27845	2016-01-24	7.98333	0.01302	0.0014	0.000152	0.00011	0.000211	0.00012	0.000229	4.4e-05	0.0001032	2.8e-05
B-27846	2016-01-24	9.28333	0.013103	0.001	0.000195	0.00012	-0.000113	0.00013	0.0002805	7.1e-05	0.0001126	2.8e-05
B-27847	2016-01-24	10.7667	0.01124	0.0013	0.0003779	6e-05	9.09e-05	7.5e-05	0.0001782	0.0001	6.08e-05	3.1e-05
B-27848	2016-01-24	12.1	0.01081	0.0012	0.0002877	9.9e-05	-0.000203	0.00015	0.0002456	7.3e-05	6.21e-05	2.6e-05
B-27849	2016-01-24	13.5833	0.01305	0.0011	0.0003568	6.1e-05	1.77e-05	9.4e-05	-7.85e-05	0.0001	0.0001282	2.6e-05
B-27850	2016-01-24	15.05	0.01361	0.0011	0.0005047	5.6e-05	-6.36e-05	8.6e-05	0.0002014	4.4e-05	6.8e-05	2.6e-05
B-27851	2016-01-24	16.4167	0.01069	0.0014	0.0003952	6.4e-05	0.000119	0.00013	0.0003987	6.9e-05	0.0001255	2.9e-05
B-27852	2016-01-24	17.9333	0.01538	0.0014	0.0004901	6.2e-05	3.89e-05	5.7e-05	0.0002688	5.3e-05	6.77e-05	2.7e-05
B-27853	2016-01-24	19.25	0.00953	0.0014	0.0004379	5.7e-05	2.63e-05	7.2e-05	0.0002284	5.6e-05	5.88e-05	2.6e-05
B-27854	2016-01-24	20.7167	0.01171	0.0012	0.0004402	6.4e-05	0.000391	0.00021	0.0002819	8.6e-05	0.0001486	2.6e-05
B-27855	2016-01-24	22.0333	0.01324	0.0011	4.3e-05	0.00011	0.0001101	7.1e-05	0.000337	5.4e-05	4.48e-05	2.5e-05
B-27856	2016-01-24	23.5	0.00742	0.0014	0.000166	0.00012	-6.2e-05	0.00015	0.0002866	7.9e-05	2.07e-05	2.5e-05
B-27857	2016-01-25	0.816667	0.0117	0.0014	0.000512	6.4e-05	4.7e-05	0.00011	0.0002585	5.2e-05	2.73e-05	2.8e-05
B-27858	2016-01-25	2.31667	0.00814	0.0011	0.0001117	8.1e-05	-1.98e-05	8.8e-05	0.000585	0.00013	6.45e-05	2.8e-05
B-27859	2016-01-25	3.66667	0.01003	0.0012	0.0004379	6e-05	6.85e-05	6.2e-05	0.0005389	9.5e-05	0.0001051	2.7e-05
B-27860	2016-01-25	5.13333	0.01062	0.0013	0.0003249	5.7e-05	-0.000268	0.0002	0.0003099	7.4e-05	9.45e-05	2.6e-05
B-27861	2016-01-25	6.48333	0.0135	0.0014	0.0004715	6.4e-05	3.56e-05	6.8e-05	0.000401	6.5e-05	0.0001181	2.6e-05
B-27862	2016-01-25	7.95	0.00975	0.0015	0.000341	5.2e-05	2.86e-05	4.4e-05	0.0003039	9e-05	8.11e-05	2.6e-05
B-27863	2016-01-25	9.3	0.01164	0.0012	0.0004766	6e-05	0.000158	0.00011	0.000379	7.3e-05	7.58e-05	2.5e-05
B-27864	2016-01-25	10.8167	0.00883	0.0013	0.000123	0.00011	0.0001266	9.1e-05	0.0003089	7.9e-05	-7.2e-06	2.8e-05
B-27865	2016-01-25	12.15	0.01136	0.0013	0.000173	0.00011	5.67e-05	7.3e-05	0.0003622	4.4e-05	8.65e-05	2.7e-05
B-27866	2016-01-25	13.6333	0.01085	0.0015	0.000412	5.5e-05	-0.000235	0.00015	-8.6e-06	8.1e-05	8.25e-05	2.4e-05
B-27867	2016-01-25	14.95	0.01338	0.0014	0.00021	0.00012	3.69e-05	8.7e-05	0.0003317	5.5e-05	0.0001014	2.9e-05
B-27868	2016-01-25	16.45	0.01258	0.0011	0.0002309	0.0001	-5e-05	6.1e-05	0.0004006	6e-05	6.43e-05	2.4e-05
B-27869	2016-01-25	17.7667	0.0133	0.0013	0.0003495	6e-05	0.0002183	6.9e-05	0.0001471	5.9e-05	0.0001324	3e-05
B-27870	2016-01-25	19.1833	0.00854	0.0014	0.0003584	5.1e-05	0.0001627	8.8e-05	0.0003636	6.2e-05	0.0001703	2.8e-05
B-27871	2016-01-25	20.5333	0.01237	0.0012	0.0004723	6.3e-05	7.2e-05	0.00012	0.0002673	5e-05	7.52e-05	2.9e-05
B-27872	2016-01-25	22	0.00955	0.002	0.0004391	6.5e-05	0.000226	0.00012	0.0002188	6.9e-05	0.0001194	2.7e-05
B-27873	2016-01-25	23.35	0.01159	0.0014	0.0001513	0.0001	7.3e-05	0.00013	0.0003246	6.8e-05	0.0001241	2.6e-05
B-27874	2016-01-26	0.816667	0.01398	0.0012	0.000536	0.00011	0.000181	0.00017	0.0002378	5.6e-05	8.48e-05	2.6e-05
B-27875	2016-01-26	2.15	0.01161	0.0011	0.0004233	5.7e-05	-0.000123	0.00015	0.0002844	9.1e-05	9.56e-05	2.7e-05
B-27876	2016-01-26	3.65	0.00946	0.0014	9.7e-05	0.00011	-0.000284	0.00019	0.0003809	7.1e-05	6.25e-05	2.7e-05
B-27877	2016-01-26	10.7167	0.012757	0.001	0.0004757	4.8e-05	0.0001858	7.2e-05	0.0003567	8.1e-05	8.47e-05	2.6e-05
B-27878	2016-01-26	12.0333	0.011315	0.00094	0.0003192	5.7e-05	8e-06	0.00017	0.0002561	4.8e-05	8.1e-05	2.6e-05
B-27879	2016-01-26	12.6333	0.00999	0.0011	0.0004086	5.9e-05	5e-06	6.2e-05	0.0005392	5.7e-05	6.92e-05	2.7e-05
B-27880	2016-01-26	14.1333	0.01068	0.0013	0.0003884	5.2e-05	6.7e-05	7.3e-05	0.000492	0.00013	6.96e-05	2.6e-05
B-27881	2016-01-26	15.4833	0.01328	0.0012	0.0003516	5.6e-05	5.6e-05	0.00012	0.0002226	6.8e-05	8.75e-05	2.4e-05
B-27882	2016-01-26	16.9833	0.01126	0.0012	0.0002726	6.6e-05	0.0003191	9.6e-05	0.0001813	3.8e-05	6.16e-05	2.6e-05
B-27883	2016-01-26	18.3167	0.00908	0.0013	0.000431	6.3e-05	0.0001227	9.4e-05	0.0001542	5.1e-05	3.75e-05	2.6e-05
B-27884	2016-01-26	19.8	0.00995	0.0012	0.0002323	9.3e-05	7.19e-05	6.1e-05	0.0003144	3.8e-05	9.42e-05	2.6e-05
B-27885	2016-01-26	21.1167	0.01013	0.0013	0.0003475	6.2e-05	0.0001948	6.6e-05	3.44e-05	6.5e-05	0.0001088	2.7e-05
B-27886	2016-01-26	22.6	0.010557	0.00088	0.0001676	0.0001	0.000164	8.5e-05	0.000319	0.00011	0.0001239	3e-05
B-27887	2016-01-26	23.9333	0.01139	0.0012	0.000232	0.00011	-6e-06	7.7e-05	0.0002264	5.4e-05	6.92e-05	2.9e-05
B-27888	2016-01-27	1.4	0.01074	0.0012	0.0004481	9.1e-05	0.000102	0.00011	0.0002336	3.2e-05	5.39e-05	2.8e-05
B-27889	2016-01-27	2.73333	0.00874	0.0012	0.0003754	5e-05	-0.0001048	8.2e-05	0.0003463	6.3e-05	5.8e-06	2.4e-05
B-27890	2016-01-27	4.2	0.01029	0.0011	0.0002113	5.8e-05	5.56e-05	5.5e-05	0.0002581	6.7e-05	7.33e-05	2.8e-05
B-27891	2016-01-27	5.55	0.01038	0.0011	0.0003356	5.9e-05	0.0001549	8.3e-05	0.0005578	7.8e-05	0.0001152	2.5e-05
B-27892	2016-01-27	6.98333	0.00995	0.0012	0.0002138	5.6e-05	0.000326	0.00012	0.0001743	5.8e-05	5e-05	2.8e-05
B-27893	2016-01-27	8.3	0.01148	0.0012	0.0001484	9.1e-05	0.0001766	6.9e-05	0.0002039	5.4e-05	0.000107	2.9e-05
B-27894	2016-01-27	9.73333	0.009753	0.001	0.0003122	4.7e-05	0.0001883	3.9e-05	0.0001104	6.1e-05	6.46e-05	2.6e-05
B-27895	2016-01-27	11.05	0.011017	0.00098	0.0003806	5.6e-05	0.0001757	8.6e-05	0.0001623	4.5e-05	0.0001508	2.8e-05
B-27896	2016-01-27	12.5333	0.010238	0.001	-2e-07	9.7e-05	9.52e-05	7e-05	0.0002558	7.5e-05	6.88e-05	2.4e-05
B-27897	2016-01-27	13.8667	0.01217	0.0014	0.000302	0.00012	0.0001761	7.3e-05	0.00021	6.7e-05	4.42e-05	3e-05
B-27898	2016-01-27	15.2833	0.016199	0.00063	6.51e-05	0.0001	0.0001487	8.9e-05	0.000594	0.0001	0.0001205	3e-05
B-27899	2016-01-27	16.6	0.011644	0.001	9.46e-05	9.7e-05	0.0002329	9.2e-05	2.42e-05	8e-05	0.0001468	2.7e-05
B-27900	2016-01-27	18.0333	0.01078	0.0014	0.0001452	8.4e-05	0.000155	0.00011	0.0001804	7.5e-05	2.74e-05	2.8e-05
B-27901	2016-01-27	19.4	0.01026	0.0013	-9.2e-06	9.3e-05	8.02e-05	9.1e-05	0.000325	7.8e-05	0.0001064	2.9e-05
B-27902	2016-01-27	20.8333	0.01125	0.0011	0.0002515	0.0001	6.53e-05	5.4e-05	0.0003527	4.9e-05	8.01e-05	2.5e-05
B-27903	2016-01-27	22.1667	0.01031	0.0012	0.0003579	6.2e-05	0.000234	0.00014	0.0004091	6.7e-05	8.61e-05	2.6e-05
B-27904	2016-01-27	23.65	0.010487	0.001	0.0002273	5.2e-05	0.000419	0.00011	0.0001762	5.2e-05	8.07e-05	2.5e-05
B-27905	2016-01-28	1	0.0089	0.0012	0.000178	0.00011	0.000406	0.00013	0.0003543	6.1e-05	6.98e-05	2.6e-05
B-27906	2016-01-28	2.5	0.013	0.0011	0.000193	0.00011	0.0003502	0.0001	0.0004244	9.5e-05	6.94e-05	2.1e-05
B-27907	2016-01-28	3.83333	0.013742	0.00099	0.0003511	6.6e-05	-4.39e-05	9.1e-05	0.0004231	5.2e-05	4.85e-05	2.7e-05
B-27908	2016-01-28	5.3	0.009143	0.00097	0.0004458	5.4e-05	0.0001393	6.3e-05	0.0002378	7e-05	0.000126	2.7e-05
B-27909	2016-01-28	6.61667	0.01128	0.0013	0.0001367	0.0001	7e-05	9e-05	0.0002331	4.8e-05	5.6e-06	2.6e-05
B-27910	2016-01-28	8.16667	0.00958	0.0011	-1.87e-05	9.7e-05	-0.000101	0.00012	9.07e-05	7.3e-05	6.63e-05	2.6e-05
B-27911	2016-01-28	9.5	0.01172	0.0013	0.000163	0.00011	0.0001418	7.2e-05	0.0003423	6.3e-05	8.38e-05	2.5e-05
B-27912	2016-01-28	12.4833	0.015972	0.00066	5.98e-05	0.0001	0.000529	0.00017	0.0001359	7.4e-05	8.16e-05	2.1e-05
B-27913	2016-01-28	14.0333	0.01001	0.00091	0.0003007	5.6e-05	-0.000201	0.00014	0.0001704	6e-05	1.88e-05	2.5e-05
B-27914	2016-01-28	15.3833	0.009473	0.001	0.0002501	9.1e-05	0.0004659	9.2e-05	0.0001473	7.4e-05	4.76e-05	2.5e-05
B-27915	2016-01-28	16.8667	0.011343	0.00098	0.0003079	5.1e-05	8.9e-05	6.4e-05	0.0001121	6.9e-05	4.56e-05	2.6e-05
B-27916	2016-01-28	18.1833	0.0124	0.0011	0.0004188	5.6e-05	7.82e-05	8.8e-05	0.0003268	3.9e-05	4.05e-05	2.4e-05
B-27917	2016-01-28	19.6833	0.013319	0.00066	0.0003035	6e-05	-0.000174	0.00014	0.0005102	6.2e-05	1.26e-05	2.3e-05
B-27918	2016-01-28	21.0167	0.01106	0.0012	0.0003065	5.7e-05	0.0001079	8.8e-05	0.0002511	6.6e-05	0.0001341	2.9e-05
B-27919	2016-01-28	22.5	0.01234	0.0011	0.0006797	8.6e-05	0.0001339	8.5e-05	0.0001973	7.3e-05	7.65e-05	2.6e-05
B-27920	2016-01-28	23.8667	0.01011	0.0012	0.0003976	9.7e-05	3.62e-05	8.3e-05	0.0001866	5.3e-05	0.0001145	2.5e-05
B-27921	2016-01-29	1.31667	0.01216	0.0012	0.000424	5.5e-05	9.17e-05	7.6e-05	0.0002438	4.5e-05	9.88e-05	3e-05
B-27922	2016-01-29	2.68333	0.01205	0.0011	0.0005171	0.0001	0.000182	7.9e-05	0.0002963	6.2e-05	8.3e-05	2.7e-05
B-27923	2016-01-29	4.16667	0.00898	0.0012	0.0002081	9.1e-05	-1.1e-06	7.8e-05	0.0001839	4.6e-05	8.11e-05	2.5e-05
B-27924	2016-01-29	5.51667	0.00991	0.0013	0.0004092	5.8e-05	0.0002085	6.6e-05	0.0001349	5.7e-05	6.04e-05	2.8e-05
B-27925	2016-01-29	6.1	0.01465	0.00075	6.42e-05	8.2e-05	0.0001015	5.3e-05	0.0002138	4.1e-05	7.2e-05	2.7e-05
B-27926	2016-01-29	7.41667	0.01192	0.0011	0.000452	6.7e-05	0.0002459	7.6e-05	0.0002683	5.8e-05	3.54e-05	2.7e-05

## Sheet: Table S6
Table S6. Average compositions of EPMA secondary standards for years 2018-2019
Key: SD = standard deviation; n = number of analyses; FeO* = FeO total;
Standard	n	SiO2	TiO2	Al2O3	FeO*	MnO	MgO	CaO	Na2O	K2O	P2O5	Cl	Total
STH-S6	151	63.2185	0.710023	17.4313	4.40889	0.0791847	1.97276	5.27213	4.39706	1.3329	0.154315	0.045587	98.9686
SD		1.13268	0.0231797	0.566304	0.251088	0.0558473	0.0504138	0.14205	0.447486	0.0763056	0.0889535	0.108404
ATHO-G	107	75.3867	0.242262	12.0374	3.29744	0.114327	0.0984906	1.73467	3.39797	2.77311	0.0224152	0.0418898	99.1394
SD		1.64363	0.0188263	0.486086	0.274373	0.0493259	0.0121152	0.0744724	1.15312	0.106597	0.032706	0.0229969
VG-568	45	74.9612	0.0774932	12.5836	1.36286	0.0511795	0.0379045	0.640273	3.63527	5.22828	0.0128568		98.5909
SD		2.4281	0.015296	1.05153	0.407867	0.081539	0.0138745	0.29819	0.461777	0.25915	0.0453404
Lipari obsidian	109	74.3244	0.0749519	12.9187	1.53806	0.061462	0.0411167	0.747519	3.79017	5.28394	0.044049	0.309848	98.9879
SD		1.37542	0.0165716	0.458853	0.193458	0.0640327	0.010822	0.0482504	0.512599	0.162591	0.213964	0.278777

## Sheet: Table S7
Table S7. Standard compositions for LA-ICP-MS analyses
	run	Sr	Y	Zr	Nb	Cs	Ba	La	Ce	Pr	Nd	Sm	Eu	Gd	Dy	Er	Yb	Hf	Ta	Pb	Th	U
StHs6/80-G GeoREM		482	11.4	118	6.94	1.75	298	12	26.1	3.2	13	2.78	0.953	2.59	2.22	1.18	1.13	3.07	0.42	10.3	2.28	1.01
STHS80/11-1	1	482.57	10.6251	113.955	6.4521	1.6799	306.02	10.9675	24.9845	2.9425	12.9042	2.9318	1.0058	2.3005	2.0009	1.0807	1.1663	2.5466	0.45903	10.0687	2.4717	1.07
STHS80/11-2	1	475.08	10.7	111.815	6.1311	1.8297	306.02	11.1815	25.252	3.0281	12.8079	2.7713	0.9309	2.5573	2.354	1.2412	1.1877	2.8034	0.4494	10.2827	2.3005	0.9844
STHS80/11-3	1	501.83	11.2885	111.815	6.7517	1.7762	303.88	11.4169	26.536	2.9425	12.8721	2.675	0.856	2.6108	2.354	1.2519	1.284	2.7606	0.39804	10.807	2.2149	1.0914
STHS6/80-4	2	484.71	11.2243	114.062	6.5591	1.7548	310.3	12.1017	26.8891	3.1672	13.5783	3.0174	0.92448	2.6857	2.3326	1.2626	1.1235	2.9318	0.41623	10.6572	2.2791	1.02078
STHS6/80-5	2	514.67	11.5346	125.083	7.062	1.7655	322.07	12.5083	27.4776	3.1886	13.0219	3.0174	0.97905	2.8462	2.3112	1.2947	1.07	2.9104	0.45047	10.3041	2.3112	1.07321
STHS6/80-6	2	488.99	10.9354	115.453	7.0085	1.5729	309.23	11.8556	26.3969	3.0495	13.2359	2.5573	0.98547	2.3112	2.3433	1.2198	1.0058	3.0388	0.46545	10.1757	2.4075	0.98012
STHS6/80-7	2	510.39	11.0959	116.095	6.8159	1.6264	323.14	12.0482	26.2578	3.3491	13.7495	2.7499	0.94481	2.6643	2.2256	1.30219	1.2305	2.7927	0.39269	9.8975	2.3433	1.02934
sths6/80-3	4	486.85	10.7963	115.881	6.634	1.6906	319.93	12.2836	26.75	3.1672	14.231	2.8141	0.8667	2.3219	2.0116	1.177	1.0486	3.1244	0.47187	<LOD	2.2256	1.0486
sths6/80-4	4	457.96	10.3897	105.074	6.5163	1.6799	288.9	11.2029	24.824	2.8676	12.198	2.5252	0.90736	2.3754	2.0009	1.177	1.1342	2.6108	0.3852	10.593	2.0758	1.0914
STHS6/11-5	4	490.06	10.5609	113.955	6.7731	1.6371	306.02	11.9091	26.001	3.21	12.1231	3.0816	0.9309	2.4931	2.3112	1.0807	1.0914	2.9211	0.34775	10.3148	2.14	1.0058
STHS6/805	5	481.5	10.1971	104.539	6.5912	1.5729	313.51	12.3371	27.285	3.1137	12.412	3.1351	0.8667	2.3219	1.8404	1.0593	1.0165	2.9104	0.36594	9.523	2.2684	1.0058
STHS6/806	5	471.87	10.0794	107.107	6.1632	1.6157	284.62	11.1708	24.1392	2.9639	11.4918	2.4075	0.84423	2.4931	2.1293	1.0379	1.1449	2.6964	0.41623	9.8868	2.1186	0.8346
STHS6/807	5	512.53	10.8177	118.449	6.6875	1.712	327.42	12.2515	27.071	3.1779	13.4392	2.9853	1.03469	2.3754	2.1828	1.21552	1.0058	2.8462	0.45475	9.9724	2.2684	1.0486
STHS	6	484.71	11.0103	115.132	6.3772	1.66599	300.349	11.9091	25.7228	3.0281	13.3964	2.7499	0.94267	2.568	2.247	1.177	1.2091	2.9639	0.40446	10.3255	2.30157	1.00901
average		488.837	10.8039	113.458	6.60878	1.68426	308.672	11.796	26.1134	3.08542	12.9615	2.81563	0.929983	2.49463	2.18891	1.18411	1.12274	2.84696	0.419822	10.216	2.26618	1.02093
%RSD		3.32053	3.85699	4.74066	4.15148	4.58243	3.99435	4.32393	3.85575	4.30488	5.61752	7.90824	6.25286	6.77319	7.61092	7.44174	7.80056	5.58912	9.37337	3.4524	4.75599	6.37071
ATHO-G GeoREM		94.1	94.5	512	62.4	1.08	547	55.6	121	14.6	60.9	14.2	2.76	15.3	16.2	10.3	10.5	13.7	3.9	5.67	7.4	2.37
ATHO-1	1	100.687	96.621	530.72	62.488	0.95765	588.5	60.241	129.791	15.3973	66.34	14.98	2.8569	15.9323	16.799	10.6251	11.0317	14.124	3.9697	5.4463	8.2069	2.4931
ATHO-2	1	100.473	92.662	495.41	60.027	0.8239	567.1	56.175	125.511	14.7125	63.13	14.873	2.7499	15.087	16.799	10.8712	10.6893	14.0063	3.7878	6.0883	7.4686	2.461
ATHO-3	1	100.045	93.839	493.27	60.348	0.9844	579.94	58.422	127.865	14.5841	63.451	15.0656	2.9532	14.9907	16.3496	10.1864	10.7642	13.4178	3.638	6.1418	7.9287	2.4289
ATHO-4	2	100.045	99.082	535	59.92	0.80999	563.89	57.887	126.046	14.8302	64.521	14.5627	2.889	16.3924	17.6443	11.021	10.8177	14.4664	3.9376	5.6175	7.9501	2.4075
ATHO-5	2	95.551	93.625	502.9	58.208	0.87526	543.56	55.426	120.268	13.9207	61.632	14.7339	2.7927	14.9693	17.1735	10.2827	10.1222	13.1503	3.6594	5.4249	7.2439	2.14
ATHO-6	2	100.045	96.514	506.11	60.669	0.81641	574.59	57.78	126.26	15.1084	64.093	14.5092	2.8462	14.7874	16.7883	10.4004	11.1494	13.5783	3.8092	5.3607	7.9287	2.4075
atho-1	3	100.045	93.946	517.88	60.562	0.94909	598.13	58.957	129.363	15.7611	66.34	15.4401	2.9853	16.3389	17.548	10.9889	10.3148	13.3322	3.8627	5.8208	7.9287	2.3433
atho-2	4	101.971	95.658	528.58	61.632	0.9844	639.86	60.562	135.676	16.0714	67.196	15.301	2.8248	14.445	17.0879	10.2827	10.6465	13.4606	3.9483	5.5212	8.0464	2.8462
atho-3	4	96.193	92.555	492.2	60.134	1.0165	559.61	58.101	124.441	14.873	59.064	14.124	2.5466	14.231	16.05	10.1971	10.3362	13.696	3.7771	5.5212	7.5863	2.3219
atho-4	4	102.078	95.551	517.88	60.241	0.80143	607.76	60.134	129.684	15.1084	64.521	15.943	2.9104	15.3331	17.8583	10.7856	10.5502	13.6853	3.638	5.7352	7.7682	2.2577
ATHO5	5	100.473	94.695	509.32	60.883	0.9416	582.08	59.92	133.108	15.6755	63.986	16.264	2.7285	16.264	16.9809	11.0852	11.8235	13.9314	3.8734	6.4628	7.8431	2.5359
ATHO6	5	102.934	96.407	530.72	62.488	0.80678	584.22	60.883	134.178	15.4187	68.587	16.1356	2.8783	15.7825	18.3291	11.1601	10.6037	14.1882	3.9697	5.4998	8.3674	2.5787
ATHO	6	102.185	97.37	540.35	62.381	0.87954	608.83	60.669	132.252	15.7183	65.912	15.2689	2.8569	15.7932	17.7727	10.5823	11.0638	14.2524	3.9269	5.671	7.8538	2.4396
average		100.21	95.2712	515.411	60.7678	0.895919	584.467	58.8582	128.803	15.1677	64.521	15.1693	2.83221	15.4113	17.1677	10.6514	10.7626	13.7915	3.8306	5.71627	7.85545	2.43548
%RSD		2.16013	2.02914	3.25101	2.01592	8.84664	4.29094	2.97558	3.37137	3.88003	3.84657	4.27719	3.96952	4.70334	3.73703	3.34877	4.08804	2.91439	3.2395	5.77356	3.76735	6.96397

## Sheet: Table S8
Table S8. Major element normalised composition of tephra samples
Key: FeO* = FeO total; n.a. = not alanysed; Alkalis = Na2O+K2O
Wt%	SiO2	TiO2	Al2O3	FeO*	MnO	MgO	CaO	Na2O	K2O	Cl	Alkalis
Shala 212 ka Qi2 Unit A
17-14A1-1	74.7691	0.312863	9.73746	4.93408	0.2674	0.0234173	0.203899	4.89431	4.84136	n.a	9.73567
17-14A1-2	75.098	0.308747	9.67152	5.03401	0.245169	0.0166038	0.18611	4.81143	4.63404	n.a	9.44547
17-14A1-3	74.8774	0.319251	10.0101	4.84048	0.280224	0.0509693	0.289075	4.51782	4.81649	n.a	9.33431
17-14A1-4	74.8572	0.327077	10.0292	5.02677	0.247268	0.0602008	0.23137	4.22815	4.97971	n.a	9.20786
17-14A1-5	74.5198	0.329306	9.78627	5.1438	0.292975	0.0184301	0.244675	4.8969	4.75126	n.a	9.64815
17-14A1-6	75.3167	0.333094	9.50937	5.01217	0.27222	0.106959	0.244248	4.14385	5.03553	n.a	9.17939
17-14A1-7	74.9907	0.305197	9.63502	4.92612	0.240306	0.0175523	0.197862	4.92835	4.73209	n.a	9.66044
17-14A1-8	74.7848	0.329487	9.64211	5.00326	0.281499	0.0231369	0.212517	4.98183	4.73075	n.a	9.71259
17-14A1-9	74.8239	0.324803	9.88973	5.1366	0.26084	0.0207908	0.217243	4.5256	4.79599	n.a	9.32159
17-14A1-10	75.3159	0.332144	9.67461	4.88286	0.2298	0.0281602	0.229485	4.21132	5.06317	n.a	9.27449
Shala 212 ka Qi2 Unit B
17-14B5	74.4628	0.337491	10.0182	5.01824	0.264637	0.0138769	0.18246	4.98366	4.7097	0.191304	9.69335
17-14B5	74.4355	0.346306	9.64068	4.9588	0.321593	0.0200726	0.234936	5.17291	4.86059	0.197594	10.0335
17-14B5	74.8564	0.320387	9.87724	4.85962	0.186937	0.0310848	0.211805	4.98096	4.66539	0.19376	9.64635
17-14B5	75.6597	0.312883	9.62682	4.73564	0.239258	0.485421	0.192405	4.08661	4.63259	n.a	8.7192
17-14B5	74.9398	0.317835	9.61362	5.08922	0.265238	0.0320948	0.227562	4.74208	4.75121	n.a	9.49329
17-14B5	74.7483	0.340652	9.82565	5.07242	0.263934	0.0173641	0.231311	4.50403	4.97213	n.a	9.47616
17-14B5	75.2749	0.331377	9.77596	4.88631	0.223637	0.0164186	0.240485	4.56073	4.68543	n.a	9.24616
17-14B5	74.9832	0.325589	9.71549	5.02398	0.2552	0.0226515	0.214872	4.73946	4.71511	n.a	9.45457
17-14B5	74.9639	0.319808	9.83564	4.98748	0.244896	0.0133696	0.198739	4.56464	4.84986	n.a	9.4145
17-14B5	74.9777	0.345218	9.6088	4.95272	0.204438	0.0232659	0.22598	4.78889	4.87366	n.a	9.66255
17-14B5	74.7867	0.332967	9.8053	4.91026	0.234451	0.018921	0.178428	4.88828	4.83944	n.a	9.72772
17-14B5	74.6937	0.326255	9.68295	5.01555	0.231536	0.0240253	0.197837	4.75404	5.06307	n.a	9.81711
17-14B5	75.3158	0.327612	9.7058	4.83438	0.271047	0.0223927	0.209812	4.42908	4.88564	n.a	9.31472
17-14B5	74.7576	0.311373	9.68779	5.08009	0.269045	0.035327	0.214224	4.66887	4.96	n.a	9.62887
17-14B5	75.0455	0.318868	9.72828	4.88129	0.281398	0.0311374	0.193685	4.28483	5.19552	n.a	9.48034
17-14B5	74.8218	0.315722	9.74648	5.09338	0.289193	0.0278917	0.196605	4.37722	5.11949	n.a	9.49671
17-14B5	74.9062	0.331742	9.7776	4.84777	0.267565	0.0545985	0.204665	4.28955	5.2951	n.a	9.58465
17-14B5	75.1075	0.321207	9.71691	4.98176	0.188914	0.0198012	0.206681	4.62277	4.81874	n.a	9.44151
17-14B5	74.8491	0.330745	9.65509	5.09311	0.290075	0.0277821	0.217398	4.53356	4.98367	n.a	9.51723
17-14B5	75.0344	0.325571	9.4767	4.88813	0.265807	0.418773	0.235872	4.17425	5.16275	n.a	9.337
17-14B5	74.4857	0.331227	9.84681	4.97378	0.265712	0.297288	0.201701	4.63235	4.95713	n.a	9.58948
17-14B5	74.8716	0.338988	9.7083	4.98382	0.219088	0.0748443	0.229765	4.57116	4.98745	n.a	9.55861
17-14B5	75.2033	0.332942	9.88849	4.80324	0.264848	0.0199786	0.212548	4.59289	4.67448	n.a	9.26737
17-14B5	74.8686	0.324695	9.79244	5.11672	0.230707	0.0276807	0.18324	4.62846	4.80907	n.a	9.43753
17-14B5	74.8725	0.327956	9.6744	5.15344	0.264105	0.0294864	0.236846	4.76025	4.66988	n.a	9.43013
17-14B5	75.1136	0.326319	9.61197	5.07165	0.280375	0.0192568	0.209522	4.51907	4.84821	n.a	9.36728
17-14B5	74.7674	0.336347	9.77705	5.11524	0.236533	0.0465081	0.230058	4.53383	4.95888	n.a	9.49272
17-14B5	74.6639	0.329643	9.71275	5.00964	0.293312	0.0178992	0.226403	4.7403	4.96926	n.a	9.70955
17-14B5	75.2349	0.337307	9.84127	4.78156	0.270266	0.0190195	0.20333	4.69014	4.62541	n.a	9.31555
17-14B5	75.0087	0.331632	9.6564	5.07527	0.305541	0.0699937	0.209981	4.36297	4.98097	n.a	9.34395
17-14B5	75.0363	0.334822	9.53941	5.1194	0.239636	0.0232747	0.198096	4.84564	4.63658	n.a	9.48222
17-14B5	74.7688	0.328546	9.81843	5.20786	0.258469	0.0131461	0.165598	4.88038	4.55543	n.a	9.43581
17-14B5	74.5814	0.321558	9.72696	5.04254	0.238748	0.368339	0.234877	4.48309	4.99404	n.a	9.47713
17-14B5	74.5064	0.336289	9.73512	4.99066	0.2587	0.272355	0.250867	4.35365	5.26969	n.a	9.62334
17-14B5	74.6558	0.334956	9.73725	5.07277	0.277523	0.0246899	0.196883	4.76398	4.91785	n.a	9.68183
17-14B5	74.9603	0.333194	9.59625	4.96317	0.272175	0.0732448	0.175015	4.6866	4.91534	n.a	9.60194
17-14B5	75.1444	0.324426	9.64614	5.11499	0.272123	0.0152288	0.182746	4.59605	4.70234	n.a	9.29839
17-14B5	74.9453	0.32781	9.83674	5.02117	0.236899	0.0191337	0.170089	4.56545	4.87106	n.a	9.43652
17-14B1-1	75.1393	0.32217	9.72807	4.91723	0.252642	0.0487876	0.218255	4.38841	4.96483	n.a	9.35324
17-14B1-2	74.7781	0.322392	9.94322	4.86752	0.256656	0.0212016	0.213614	4.63963	4.9274	n.a	9.56703
17-14B1-3	74.9639	0.332463	9.76941	5.04358	0.272396	0.242417	0.228125	3.53009	5.59428	n.a	9.12437
17-14B1-4	75.4028	0.334843	9.65942	4.8706	0.233832	0.0400824	0.225342	4.31331	4.90606	n.a	9.21937
17-14B1-5	74.997	0.303658	9.66368	5.00224	0.286331	0.0819791	0.239115	4.26519	5.12905	n.a	9.39424
17-14B1-8	75.5568	0.314455	9.81247	5.12853	0.299516	0.0265449	0.218807	3.16819	5.47179	n.a	8.63998
17-14B1-9	74.9045	0.33495	9.6622	4.98461	0.262438	0.211089	0.206578	4.45802	4.95056	n.a	9.40857
Shala 212 ka Qi2 Unit C
ETH17-14C-1	74.6359	0.334522	9.66045	4.93965	0.240021	0.016628	0.228557	5.17471	4.74786	0.1525	9.92257
ETH17-14C-2	74.5507	0.340497	9.73575	4.86659	0.25658	0.0214672	0.21724	5.35253	4.63579	0.1601	9.98832
ETH17-14C-3	74.661	0.328804	9.57723	4.82633	0.219237	0.0226189	0.232207	5.23679	4.82882	0.1614	10.0656
ETH17-14C-4	74.9007	0.327877	9.54967	4.87457	0.263471	0.0110762	0.173938	5.19558	4.7031	0.1571	9.89867
ETH17-14C-5	74.5401	0.311354	9.78173	4.88669	0.266055	0.0220234	0.222843	5.30065	4.66854	0.1571	9.96919
ETH17-14C-6	74.7753	0.348546	9.57644	4.817	0.285174	0.0189077	0.213283	5.25343	4.71113	0.1525	9.96456
ETH17-14C-7	74.7104	0.32062	9.68733	4.76462	0.260252	0.0106289	0.233525	5.40194	4.60168	0.1388	10.0036
ETH17-14C-8	74.9587	0.332641	9.6032	4.83688	0.206463	0.0257164	0.220994	4.86145	4.92219	0.1862	9.78364
ETH17-14C-10	74.9406	0.339159	9.711	4.81533	0.22371	0.0211519	0.210789	5.05905	4.68196	0.1649	9.74101
ETH17-14C-11	74.7613	0.322788	9.77496	4.76497	0.225797	0.0127049	0.220839	5.13497	4.74814	0.144	9.8831
ETH17-14C-12	74.6898	0.326623	9.77373	4.75085	0.228688	0.0209493	0.196593	5.30275	4.70224	0.1425	10.005
ETH17-14C-13	74.511	0.330274	9.60718	5.00353	0.230821	0.0222379	0.221144	5.32773	4.72566	0.1373	10.0534
ETH17-14C-14	74.4899	0.354938	9.50444	5.12617	0.217698	0.0157145	0.206698	5.23764	4.84677	0.1541	10.0844
ETH17-14C-15	74.721	0.320471	9.73194	4.85222	0.259601	0.024906	0.226221	5.17889	4.67261	0.15	9.8515
ETH17-14C-16	74.8423	0.32662	9.63658	4.91165	0.233565	0.0173964	0.204948	5.15623	4.67068	0.1489	9.82691
ETH17-14C-17	74.7413	0.334352	9.78555	4.83121	0.237322	0.0181996	0.207787	4.99531	4.82382	0.1779	9.81914
ETH17-14C-19	74.6868	0.332383	9.82682	4.85065	0.235351	0.0164319	0.200407	5.06624	4.77909	0.1535	9.84533
ETH17-14C-20	74.6194	0.330384	9.54638	5.00638	0.231878	0.0150175	0.226522	5.23574	4.76537	0.1496	10.0011
ETH17-14C-21	74.3906	0.344674	9.58804	5.11005	0.242156	0.022519	0.233107	5.27489	4.75232	0.1489	10.0272
ETH17-14C-22	74.6666	0.314944	9.70776	5.06398	0.208553	0.0148598	0.213815	5.15159	4.62851	0.141	9.7801
ETH17-14C-23	74.941	0.343824	9.51562	4.71599	0.226503	0.0148324	0.177474	5.35986	4.70147	0.1488	10.0613
ETH17-14C-24	74.5548	0.319987	9.62636	4.88654	0.219772	0.0141988	0.234486	5.46498	4.66893	0.1443	10.1339
ETH17-14C-25	74.711	0.307149	9.68983	4.93885	0.242722	0.0245636	0.208583	5.25006	4.62161	0.1437	9.87167
ETH17-14C-26	74.8119	0.322526	9.64209	4.97078	0.24169	0.00245891	0.227551	5.14505	4.62746	0.1453	9.77251
ETH17-14C-27	74.8285	0.335167	9.69289	4.80735	0.187953	0.0147111	0.227457	5.21978	4.65962	0.1455	9.8794
ETH17-14C-28	74.84	0.326427	9.46937	4.88819	0.229156	0.00944975	0.202964	5.38646	4.62945	0.1516	10.0159
ETH17-14C-29	74.4469	0.336395	9.79549	4.70583	0.242032	0.00812946	0.225567	5.44231	4.78198	0.1453	10.2243
ETH17-14C-30	74.8214	0.329351	9.56904	4.79164	0.242804	0.0197259	0.203146	5.28459	4.73835	0.145	10.0229
ETH17-14C-31	74.7186	0.325351	9.69587	4.71172	0.217316	0.0205485	0.212957	5.34395	4.72916	0.1488	10.0731
ETH17-14C-32	74.6544	0.337991	9.78716	4.82884	0.197144	0.0117807	0.215284	5.23855	4.72886	0.1226	9.96741
ETH17-14C-33	74.8232	0.33537	9.48576	4.77662	0.2625	0.0168161	0.23881	5.23277	4.80803	0.1759	10.0408
ETH17-14C-34	74.7581	0.332517	9.7075	4.88205	0.232949	0.0266346	0.220672	5.0456	4.77905	0.1595	9.82465
ETH17-14C-35	74.805	0.303733	9.70291	4.87244	0.228911	0.0155018	0.225913	5.04141	4.78532	0.1513	9.82672
ETH17-14C-36	74.28	0.3227	9.79203	4.96467	0.255074	0.0126346	0.225559	5.39539	4.71354	0.1526	10.1089
ETH17-14C-37	74.5229	0.335357	9.82197	4.74829	0.296646	0.0168397	0.186469	5.08498	4.96607	0.1591	10.0511
ETH17-14C-38	74.8005	0.321721	9.67493	4.73638	0.247866	0.0175353	0.224039	5.23397	4.73627	0.1394	9.97024
ETH17-14C-39	74.7375	0.329943	9.56207	4.98217	0.250827	0.0140949	0.22274	5.24833	4.62692	0.1538	9.87525
ETH17-14C-40	74.854	0.329918	9.52937	4.88138	0.235862	0.00702832	0.191005	5.32282	4.63115	0.1478	9.95396
ETH17-14C-41	74.54	0.327363	9.83293	4.98413	0.256765	0.0142019	0.208706	5.20035	4.63557	0.1578	9.83592
ETH17-14C-42	74.9328	0.332642	9.59405	4.75776	0.232798	0.0154164	0.20631	5.20049	4.71224	0.1501	9.91273
ETH17-14C-43	74.4528	0.317306	9.66926	4.95501	0.262562	0.0122915	0.221866	5.38645	4.71331	0.1578	10.0998
ETH17-14C-44	74.6257	0.323718	9.64625	4.86128	0.250221	0.0169448	0.221945	5.21005	4.84807	0.1393	10.0581
ETH17-14C-45	74.6833	0.326022	9.61352	4.85934	0.237079	0.0106401	0.228918	5.30488	4.70945	0.1503	10.0143
Kibish KHS tuff
18-1_14	77.1731	0.361094	10.0586	5.16765	0.304038	0.0140974	0.236548	2.33485	4.15242	0.163286	6.48726
18-1KHS-1	77.3138	0.360198	9.959	5.14778	0.302694	0.0091259	0.20143	2.15855	4.54745	0.148	6.706
18-1KHS-2	77.0519	0.329165	9.97392	4.95204	0.266074	0.017674	0.208446	2.56476	4.63605	0.1559	7.20081
18-1KHS-3	77.9067	0.353837	9.88556	5.33735	0.237944	0.0133046	0.238714	1.89256	4.134	0.1551	6.02656
18-1KHS-5	76.9907	0.333242	10.0499	5.09371	0.311244	0.0214538	0.220201	2.25951	4.72006	0.1585	6.97957
18-1KHS-8	77.1608	0.330027	9.82946	4.97441	0.2592	0.0174657	0.215268	2.57111	4.64224	0.1544	7.21335
18-1KHS-9	77.3263	0.322064	9.69355	5.10219	0.273407	0.022215	0.233312	2.4948	4.53219	0.1788	7.02699
18-1KHS-10	76.9054	0.3372	9.72482	5.28954	0.268323	0.0139276	0.223059	2.48738	4.75039	0.1625	7.23777
18-1KHS-11	76.4517	0.338747	9.85372	5.34108	0.292251	0.0220807	0.219745	2.81285	4.66783	0.1583	7.48068
18-1KHS-12	77.141	0.349719	9.85614	5.26111	0.300396	0.0124939	0.215764	2.32386	4.53951	0.1473	6.86337
18-1KHS-13	77.2339	0.334147	9.74389	5.22271	0.274374	0.0197446	0.234238	2.2935	4.64353	0.1504	6.93703
18-1KHS-14	77.1763	0.349952	9.95716	5.09003	0.284792	0.0227355	0.256073	2.30129	4.56167	0.1675	6.86296
18-1KHS-15	77.2391	0.341224	9.70978	4.90232	0.298558	0.0163519	0.237157	2.66352	4.59196	0.1627	7.25548
18-1KHS-18	77.075	0.369861	9.83419	5.31423	0.260631	0.00989049	0.209874	2.42013	4.50615	0.1581	6.92628
18-1KHS-19	76.3338	0.324542	9.95919	4.96664	0.220145	0.0212007	0.180206	3.05676	4.93752	0.1617	7.99427
18-1KHS-20	77.8531	0.344004	10.1225	5.01755	0.329565	0.0236978	0.22309	2.00318	4.0833	0.1451	6.08648
18-1KHS-21	76.7778	0.325853	9.81615	5.02284	0.268254	0.0218031	0.212498	2.87974	4.67507	0.1554	7.55481
18-1KHS-22	76.4355	0.341789	9.95938		0.264502	-0.000436652	0.244307	2.28969	4.48551	0.1521	6.7752
18-1KHS-23	76.6291	0.328332	10.368	5.04134	0.261497	0.0182767	0.217374	2.46022	4.67591	0.1537	7.13613
18-1KHS-24	77.077	0.329918	9.58296	5.20823	0.263459	0.0127515	0.226393	2.60811	4.69114	0.1493	7.29926
18-1KHS-26	76.7105	0.321895	10.0113	5.09298	0.245085	0.0248188	0.207429	2.73135	4.65469	0.1548	7.38604
18-1KHS-27	76.8718	0.326073	10.0506	4.99627	0.259127	0.0197221	0.212342	2.626	4.63799	0.151	7.26399
18-1KHS-28	77.2014	0.351262	9.53767	5.31982	0.239383	0.0300585	0.21475	2.56648	4.53917	0.1604	7.10564
18-1KHS-30	77.1863	0.347885	10.0448	4.97806	0.256494	0.020571	0.23153	2.40594	4.52839	0.1497	6.93434
18-1KHS-31	77.0674	0.338252	9.59595	5.07615	0.320886	0.0176892	0.202347	2.68692	4.69443	0.152	7.38135
18-1KHS-32	76.8172	0.324216	9.94754	5.06417	0.262736	0.0207789	0.221499	2.76606	4.57576	0.1591	7.34182
18-1KHS-33	76.6744	0.346824	9.49719	5.31184	0.274082	0.0246366	0.191358	3.03104	4.64867	0.1689	7.67971
18-1KHS-34	77.1918	0.3585	10.0909	5.12729	0.249997	0.0432918	0.227638	2.23123	4.47934	0.1449	6.71056
18-1KHS-35	76.6869	0.328197	10.0825	5.16054	0.277598	0.0299528	0.232348	2.56353	4.6384	0.1475	7.20193
18-1KHS-36	77.345	0.33342	9.69044	4.94683	0.290165	0.0172589	0.20441	2.62465	4.54783	0.1652	7.17247
18-1KHS-37	77.1603	0.332739	9.96308	5.0673	0.284275	0.0258038	0.21467	2.34381	4.60804	0.1607	6.95185
18-1KHS-38	77.035	0.317849	9.71267	5.10931	0.258636	0.0199532	0.217975	2.74685	4.58179	0.163	7.32865
18-1KHS-39	77.4646	0.325185	9.81866	4.91693	0.242275	0.00951601	0.194695	2.46476	4.56342	0.1507	7.02817
18-1KHS-40	76.8154	0.332823	10.0558	5.24556	0.326724	0.0192767	0.204529	2.36189	4.63796	0.1559	6.99985
18-1KHS-41	76.4829	0.326355	10.0251	5.21284	0.301102	0.0197497	0.209368	2.6975	4.72514	0.1521	7.42264
18-1KHS-42	76.8571	0.335069	10.3176	5.19336	0.334748	0.0164964	0.21938	2.36851	4.35772	0.1639	6.72623
18-1KHS-43	76.8912	0.353357	9.86447	5.20437	0.300677	0.0275791	0.221171	2.56001	4.57716	0.1653	7.13716
18-1KHS-44	76.877	0.318587	9.92979	4.89726	0.292917	0.020877	0.208983	2.78687	4.66771	0.1559	7.45458
18-1KHS-45	77.2404	0.324733	9.91045	5.06553	0.267133	0.0130415	0.221162	2.4317	4.52583	0.1592	6.95753
18-1KHS-46	77.1184	0.352919	10.1339	5.07489	0.241294	0.0164123	0.206295	2.23588	4.62002	0.1485	6.8559
18-1KHS-47	77.1379	0.335238	9.94296	5.08826	0.277389	0.0243572	0.211821	2.46943	4.51261	0.1498	6.98203
18-1KHS-49	77.0093	0.321823	10.0646	4.95864	0.268346	0.0212414	0.201206	2.53466	4.62016	0.1514	7.15483
18-1KHS-50	77.2287	0.351937	9.97779	5.03293	0.285509	0.0345121	0.26041	2.26179	4.56642	0.1573	6.82821
Gademotta 191 ka Unit D
ETH18-20-1	75.4184	0.359102	10.2053	5.66269	0.255072	0.00365772	0.265508	3.26151	4.56172	0.1299	7.82322
ETH18-20-2	75.4088	0.375865	10.3685	5.2724	0.185307	0.0124324	0.286159	3.57463	4.5047	0.1316	8.07934
ETH18-20-3	75.6306	0.355074	10.2385	5.35552	0.260625	0	0.286041	3.21861	4.62544	0.1347	7.84405
ETH18-20-4	76.171	0.232844	9.2044	6.07806	0.212929	0.00796601	0.226924	3.32732	4.53406	0.1727	7.86137
ETH18-20-5	75.7416	0.336959	10.0734	5.92939	0.239543	0.00269999	0.303263	2.77872	4.58933	0.1572	7.36805
ETH18-20-6	76.2712	0.361214	9.90796	5.55392	0.222277	0.00838783	0.27454	2.90574	4.47598	0.1423	7.38172
ETH18-20-7	76.1354	0.321411	9.68055	5.69895	0.26267	0.00139604	0.247958	3.12047	4.50995	0.1551	7.63042
ETH18-20-8	76.3413	0.257644	9.4525	5.96562	0.206202	0.00873554	0.231977	2.96846	4.56782	0.1617	7.53629
ETH18-20-9	75.989	0.362924	10.0928	5.34732	0.245669	0.00321837	0.287078	3.13394	4.53296	0.1404	7.6669
ETH18-20-10	75.7457	0.371431	10.1725	5.55447	0.220514	0.00699189	0.294413	2.99371	4.63659	0.1334	7.63031
ETH18-20-11	76.2267	0.282009	9.31178	6.18218	0.270836	0.00397499	0.262564	2.96706	4.49292	0.178	7.45997
ETH18-20-12	75.3857	0.35452	9.81827	5.64341	0.214455	0.0105208	0.262383	3.68123	4.606	0.1413	8.28722
ETH18-20-13	75.8886	0.334552	9.58645	5.90466	0.157083	0.0107297	0.259551	3.21826	4.62246	0.1405	7.84072
ETH18-20-14	75.5404	0.35847	10.0815	5.35039	0.213461	0.00799679	0.266666	3.54205	4.60946	0.1315	8.1515
ETH18-20-15	75.6639	0.367195	10.2952	5.43204	0.245118	0.0035369	0.244153	2.95685	4.73227	0.1376	7.68912
ETH18-20-16	75.6582	0.365334	10.2637	5.53977	0.159454	0.0206097	0.313701	2.99383	4.65735	0.1436	7.65118
ETH18-20-18	76.1944	0.306726	9.82033	5.46764	0.208314	0.00292636	0.226739	3.21044	4.56252	0.1302	7.77296
ETH18-20-19	75.9234	0.352223	10.0826	5.4129	0.202283	0.0179928	0.300426	2.73687	4.94149	0.193	7.67836
ETH18-20-20	76.0009	0.324516	9.76232	5.82581	0.220597	0.00937782	0.272066	2.93057	4.62719	0.1456	7.55776
ETH18-20-21	76.0231	0.356136	10.1075	5.60554	0.171828	0.0090379	0.245099	2.84759	4.62827	0.1394	7.47585
ETH18-20-23	76.2114	0.324581	9.85033	5.50431	0.247341	0.000215454	0.292048	3.02196	4.5213	0.1456	7.54326
ETH18-20-24	75.6972	0.356142	10.1592	5.57547	0.219272	0.00612371	0.257196	3.16252	4.54862	0.1296	7.71114
ETH18-20-25	75.6825	0.345842	10.3542	5.57828	0.230525	0.0119852	0.287644	2.7663	4.74277	0.1413	7.50908
ETH18-20-26	76.0159	0.368398	10.2448	5.48246	0.223038	0.0107674	0.263361	2.55472	4.8295	0.1809	7.38422
ETH18-20-27	76.0779	0.326963	9.71998	5.67377	0.225402	0.0188196	0.263366	2.91833	4.75475	0.1421	7.67308
ETH18-20-28	75.9819	0.317	9.80286	5.53265	0.210194	0.0108942	0.236041	3.39803	4.49525	0.1541	7.89328
ETH18-20-29	75.9353	0.304993	9.61897	5.64659	0.203862	0.0113079	0.260402	3.47099	4.52476	0.1533	7.99575
ETH18-20-30	76.2651	0.347076	9.7786	5.64096	0.197163	0.0017182	0.26471	3.03391	4.46195	0.1354	7.49586
ETH18-20-31	75.978	0.347798	9.78611	5.81414	0.2016	0.0177503	0.272386	3.07102	4.49147	0.1349	7.56249
ETH18-20-32	76.0318	0.385106	10.2462	5.25608	0.215534	0.0071376	0.268417	3.05262	4.51583	0.1378	7.56845
ETH18-20-33	76.2667	0.298288	9.80533	5.63253	0.212339	0.00905864	0.288259	3.00628	4.47863	0.1556	7.48491
Konso unit TA-56
ETH18-14B-8	74.4596	0.350849	9.055	5.8584	0.316503	0.0249307	0.221916	5.18238	4.50305	0.2246	9.68543
ETH18-14A	74.5579	0.348029	9.18472	5.60696	0.285629	0.0325942	0.244457	5.11633	4.61337	0.2323	9.7297
ETH18-14A	79.1391	0.372203	9.36995	5.84747	0.34662	0.036578	0.247446	1.71742	2.9135	0.2526	4.63093
ETH18-14A	74.798	0.349361	8.9646	5.47258	0.309586	0.0407322	0.237162	5.17502	4.6406	0.2274	9.81562
ETH18-14A	74.461	0.352095	8.96803	5.8376	0.308431	0.0307146	0.21008	5.16209	4.64979	0.2375	9.81188
ETH18-14A	74.6846	0.359972	9.08062	5.42854	0.341517	0.0234974	0.20343	5.21996	4.6556	0.2255	9.87556
ETH18-14A	75.0125	0.354477	8.94014	5.41773	0.319917	0.0296378	0.223514	5.07053	4.62735	0.2182	9.69789
ETH18-14A	77.8325	0.345884	9.65607	5.91948	0.254605	0.0853029	0.273839	2.553	3.0558	0.2184	5.6088
ETH18-14A	75.2473	0.345344	8.96756	5.65787	0.357165	0.0219368	0.226715	4.94333	4.20845	0.2151	9.15178
ETH18-14A	74.5687	0.337959	8.97641	5.83451	0.296304	0.0268392	0.232964	5.22752	4.49878	0.2352	9.72629
ETH18-14A	75.2674	0.354987	9.21903	5.92494	0.288993	0.0471542	0.260253	4.25751	4.33649	0.2375	8.59399
ETH18-14A	75.0189	0.386177	10.07	4.64061	0.271394	0.0338297	0.235403	4.74988	4.56917	0.1658	9.31905
ETH18-14A	74.6269	0.347362	9.36079	5.74607	0.360503	0.031128	0.216711	4.88504	4.42545	0.2244	9.31049
ETH18-14A	76.8077	0.339712	9.08359	5.824	0.31823	0.0306572	0.220321	2.93564	4.42953	0.2127	7.36517
ETH18-14A	76.7794	0.356262	9.083	5.87048	0.318613	0.0285615	0.227519	2.85431	4.48102	0.2018	7.33534
ETH18-14A	76.2599	0.3621	9.43865	6.27403	0.338584	0.0338584	0.208267	2.61733	4.46441	0.1948	7.08173
ETH18-14A	76.7702	0.365394	9.37072	5.91466	0.289311	0.029606	0.214426	2.6912	4.35447	0.2039	7.04567
ETH18-14A	76.7748	0.337782	10.125	4.49923	0.273288	0.0318153	0.240826	3.10971	4.60643	0.1349	7.71613
ETH18-14A	76.7018	0.379464	9.37507	5.89528	0.312564	0.0360147	0.214451	2.61925	4.45513	0.2077	7.07438
ETH18-14A	77.1215	0.341915	9.0416	5.91241	0.331414	0.0277819	0.22674	2.49677	4.47595	0.1891	6.97272
ETH18-14A	77.0958	0.349881	9.08948	6.0773	0.254807	0.021553	0.219688	2.38812	4.49496	0.1856	6.88308
ETH18-14A	77.0467	0.344505	9.56138	4.95007	0.256376	0.0203542	0.247282	2.89993	4.64909	0.1441	7.54902
ETH18-14A	76.3088	0.357582	9.30281	6.10603	0.3475	0.0303526	0.216329	2.92275	4.3947	0.2089	7.31745
ETH18-14A	76.2165	0.35	9.14745	6.0915	0.292403	0.0276117	0.240092	3.20436	4.37861	0.2036	7.58296
ETH18-14A	76.3883	0.358048	9.22453	5.62119	0.292558	0.0321008	0.213862	3.33065	4.52557	0.2152	7.85622
ETH18-14A	76.2871	0.376526	9.26735	5.78915	0.289204	0.0260564	0.24549	3.16682	4.54243	0.1825	7.70925
ETH18-14A	76.5008	0.360871	9.19078	5.73401	0.299575	0.0332382	0.225653	3.05845	4.57866	0.2036	7.63711
ETH18-14A	76.6864	0.331075	9.67007	5.29085	0.263482	0.0384245	0.246907	3.08064	4.39213	0.166	7.47276
ETH18-14A	76.7055	0.351263	9.21487	5.96972	0.285346	0.0345379	0.249828	2.57226	4.57785	0.1968	7.15011
ETH18-14A	75.7463	0.365511	9.21394	5.94275	0.289654	0.0251779	0.240266	3.43356	4.70838	0.195	8.14194
ETH18-14A	76.5031	0.354642	9.3002	5.8629	0.322006	0.0382926	0.233672	2.66329	4.67583	0.2037	7.33912
ETH18-14A	76.3617	0.346501	9.1821	6.06338	0.319028	0.0343134	0.249424	2.92967	4.48518	0.196	7.41485
ETH18-14A	76.4159	0.33249	10.095	4.87313	0.249635	0.0309368	0.251455	3.12964	4.56515	0.1384	7.69479
ETH18-14A	76.4011	0.362024	8.97798	5.76468	0.2924	0.033903	0.24962	3.37543	4.50129	0.2096	7.87672
ETH18-14A	76.2004	0.34702	9.28792	5.76557	0.25017	0.0360625	0.224473	3.24497	4.62852	0.1945	7.87349
ETH18-14A	76.3249	0.350271	9.33145	5.69887	0.31008	0.0248496	0.237043	3.07994	4.63877	0.2055	7.71871
Kibish unit ETH18-8
ETH18-8	74.5984	0.363278	9.2206	5.68917	0.308219	0.0315382	0.20548	4.99918	4.58234	0.2083	9.58153
ETH18-8-2	74.8342	0.344387	9.32175	5.53307	0.296187	0.031356	0.202331	4.96908	4.44599	0.2147	9.41507
ETH18-8-4	74.6394	0.380199	9.20934	5.40617	0.283818	0.031417	0.226309	5.19307	4.62011	0.224	9.81318
ETH18-8-5	75.224	0.323122	9.8771	4.51198	0.239964	0.0239859	0.226017	4.93485	4.60571	0.1504	9.54056
ETH18-8-7	75.1101	0.344425	9.62075	4.88213	0.251683	0.0291868	0.223342	4.88921	4.65413	0.1806	9.54334
ETH18-8-8	74.6926	0.345778	9.21972	5.71773	0.31481	0.0366282	0.200013	4.89183	4.54317	0.2103	9.43501
ETH18-8-9	74.4381	0.356993	9.30256	5.55536	0.29698	0.0213876	0.234838	5.25157	4.52173	0.2083	9.7733
ETH18-8-10	74.3236	0.343492	9.18443	5.77511	0.298883	0.0288899	0.205416	5.18244	4.64097	0.2111	9.82341
ETH18-8-11	74.9109	0.367957	9.17118	5.37653	0.285549	0.0305758	0.196439	4.5314	5.12344	0.1953	9.65484
ETH18-8-12	74.9238	0.359024	9.10333	5.65586	0.266421	0.0314764	0.206906	5.03643	4.3865	0.2192	9.42293
ETH18-8-14	74.7939	0.336469	9.90545	4.92089	0.279461	0.0125612	0.234154	4.81085	4.70928	0.1615	9.52013
ETH18-8-15	74.9105	0.351195	9.28307	5.53378	0.292556	0.0237121	0.197494	4.90702	4.47817	0.2138	9.38518
ETH18-8-16	74.7009	0.345305	9.36004	5.75252	0.310218	0.0329473	0.225176	4.78977	4.46661	0.2156	9.25638
ETH18-8-17	74.2328	0.36619	9.13798	5.79097	0.36396	0.0370651	0.239277	5.28416	4.52661	0.2075	9.81078
ETH18-8-18	74.951	0.345373	9.12497	5.69491	0.278527	0.0384581	0.218965	4.89232	4.43661	0.2168	9.32893
ETH18-8-19	74.5636	0.335597	9.37707	5.64792	0.265659	0.026694	0.198176	5.11233	4.47007	0.1977	9.5824
ETH18-8-20	74.5374	0.354547	9.20034	5.71849	0.3254	0.0243598	0.194453	5.12619	4.51879	0.1894	9.64499
ETH18-8-21	74.4309	0.357806	9.17991	5.9622	0.318697	0.0329614	0.208473	5.01935	4.48974	0.2099	9.5091
ETH18-8-22	74.4834	0.359389	9.1842	5.56334	0.296142	0.0371235	0.207193	5.20935	4.62203	0.2146	9.83138
ETH18-8-23	74.4751	0.366853	9.28675	5.56355	0.295746	0.0262648	0.213001	5.35834	4.39402	0.1979	9.75236
ETH18-8-24	75.4617	0.337782	9.90078	4.67219	0.234933	0.0306202	0.269394	4.48997	4.59356	0.159	9.08353
ETH18-8-25	74.7126	0.344088	9.07577	5.55483	0.311876	0.0311559	0.221893	5.20716	4.52099	0.2102	9.72814
ETH18-8-26	74.4809	0.344061	9.28038	5.62852	0.313604	0.0340079	0.215562	5.17371	4.52929	0.2173	9.703
ETH18-8-27	74.6128	0.356072	9.24387	5.48272	0.291139	0.0300263	0.196073	5.23668	4.51361	0.2064	9.75028
ETH18-8-28	74.7441	0.347124	9.1081	5.52843	0.262118	0.0314796	0.222265	4.94633	4.78819	0.1911	9.73451
ETH18-8-29	74.6347	0.361419	9.09785	5.86886	0.309939	0.0247359	0.193236	5.12181	4.36737	0.1871	9.48918
ETH18-8-30	74.3965	0.356351	9.16245	5.82413	0.294148	0.0370057	0.212546	4.96056	4.71681	0.2038	9.67736
ETH18-8-32	74.7174	0.346272	9.25523	5.68598	0.252696	0.0288735	0.198216	4.98659	4.5166	0.193	9.50319
ETH18-8-33	75.2446	0.335952	9.87222	4.53297	0.252415	0.0316315	0.237767	4.92274	4.5508	0.1329	9.47354
ETH18-8-34	74.5209	0.361467	9.13665	5.83532	0.311107	0.0322605	0.209534	4.9035	4.67416	0.2212	9.57765
ETH18-8-35	74.6906	0.352055	9.13249	5.72919	0.270844	0.0353968	0.182405	5.18006	4.41716	0.2192	9.59722
ETH18-8-36	74.9337	0.336991	9.09769	5.43513	0.320685	0.0325055	0.210486	5.02886	4.57432	0.2118	9.60318
ETH18-8-37	74.7283	0.348795	9.2375	5.76601	0.313851	0.0378288	0.202395	4.75692	4.60539	0.2047	9.36232
ETH18-8-38	74.4021	0.346745	9.35945	5.6009	0.299657	0.0283604	0.205372	4.99752	4.75555	0.2152	9.75307
ETH18-8-39	74.529	0.335641	9.25429	5.81667	0.305321	0.0173863	0.214785	4.95393	4.55203	0.1995	9.50596
ETH18-8-40	74.9076	0.338214	9.00226	5.68568	0.332545	0.0284519	0.205688	4.98797	4.51156	0.2174	9.49952
ETH18-8-41	74.8519	0.370808	9.00249	5.72461	0.247665	0.0316078	0.200465	5.03582	4.53466	0.203	9.57047
Corbetti 177 ka ignimbrite
COI2E-1	74.0071	0.353589	9.1632	5.45739	0.2517	0.0239615	0.225968	5.4475	5.05036	0.2098	10.4979
COI2E-2	74.3847	0.336694	9.24176	5.43233	0.330501	0.0224602	0.188918	5.42131	4.63405	0.2031	10.0554
COI2E-3	74.2867	0.329597	9.17055	5.60057	0.316037	0.0249475	0.170906	5.14075	4.93485	0.2203	10.0756
COI2E-4	74.2159	0.337663	9.14097	5.42105	0.332765	0.0229277	0.193427	5.32017	4.99428	0.2241	10.3145
COI2E-5	74.4218	0.334018	9.06413	5.52281	0.272634	0.0284515	0.146843	5.07551	5.11042	0.2317	10.1859
COI2E-6	74.1505	0.342309	9.06922	5.90794	0.29366	0.027281	0.201547	4.75322	5.23837	0.1799	9.99159
COI2E-7	74.4775	0.352805	9.04434	5.71625	0.297581	0.0278201	0.209224	4.67992	5.19454	0.2038	9.87447
COI2E-8	74.5955	0.3519	9.11907	5.47807	0.266027	0.0299047	0.195315	4.72931	5.2165	0.1978	9.94581
COI2E-9	74.4867	0.358789	9.08227	5.4977	0.287176	0.0354436	0.224269	4.87215	5.13031	0.1848	10.0025
COI2E-10	74.2465	0.342622	9.0262	5.67423	0.261859	0.0420382	0.189897	5.18633	5.02222	0.2065	10.2086
COI2E-11	74.5791	0.354825	8.8783	5.45772	0.299384	0.0334721	0.209538	5.12756	5.03781	0.2023	10.1654
COI2E-12	74.1456	0.341271	9.05747	5.59449	0.342832	0.0217523	0.200974	5.18203	5.09513	0.2142	10.2772
COI2E-13	74.1225	0.350701	9.08708	5.76713	0.265429	0.0272744	0.0966622	5.08004	5.2044	0.2069	10.2844
COI2E-14	74.477	0.350927	9.04421	5.37127	0.287	0.0289265	0.21278	5.01056	5.2149	0.2159	10.2255
COI2E-15	74.3777	0.340804	9.17493	5.54771	0.300992	0.0215738	0.215843	4.80868	5.19388	0.1901	10.0026
COI2E-16	74.4915	0.344355	9.0489	5.54015	0.304506	0.0229501	0.17682	4.69454	5.35634	0.1724	10.0509
COI2E-16	74.45	0.348937	8.79337	5.66407	0.314487	0.0299119	0.171838	5.03819	5.15577	0.2032	10.194
COI2E-17	74.4701	0.344234	9.13282	5.44948	0.240257	0.034624	0.219145	5.19033	4.88874	0.2139	10.0791
COI2E-18	74.2043	0.335072	9.05675	5.82254	0.296855	0.0360481	0.216082	5.0739	4.94541	0.2106	10.0193
COI2E-19	74.1872	0.337149	9.21177	5.62204	0.271415	0.0235512	0.226406	5.3792	4.71684	0.1975	10.096
COI2E-21	74.7409	0.35657	8.85809	5.74388	0.287039	0.0286002	0.219061	4.34351	5.39322	0.1631	9.73672
COI2E-23	74.1628	0.357845	8.9128	5.7929	0.271612	0.0375966	0.207042	4.85403	5.39465	0.2091	10.2487
COI2E-24	74.3854	0.349146	8.93299	5.59563	0.276955	0.0309237	0.135709	5.43704	4.83037	0.1895	10.2674
COI2E-25	74.6449	0.342818	9.03805	5.35176	0.253515	0.0281683	0.193422	5.33246	4.79612	0.2045	10.1286
COI2E-26	74.4007	0.356349	8.88174	5.89314	0.291975	0.0257288	0.197601	4.85076	5.10086	0.2217	9.95162
COI2E-27	74.2137	0.371499	8.95644	5.83771	0.299786	0.0240077	0.208619	5.09005	4.97943	0.1985	10.0695
COI2E-28	74.1571	0.34063	9.0523	5.66241	0.322876	0.0394305	0.203759	5.19245	5.02574	0.2051	10.2182
COI2E-29	74.7478	0.340994	8.91532	5.56356	0.247345	0.0278976	0.187505	4.80472	5.14219	0.1927	9.94691
COI2E-30	74.1521	0.345317	9.20926	5.6787	0.280511	0.0235944	0.195676	4.89201	5.20419	0.198	10.0962
COI2E-31	74.0798	0.363513	9.22596	5.59732	0.27606	0.0225586	0.210135	5.36133	4.83383	0.1925	10.1952
COI2E-32	74.4613	0.341629	9.15499	5.52098	0.272744	0.0213065	0.162385	4.97487	5.06455	0.2019	10.0394
COI2E-33	74.5874	0.338415	9.04408	5.47682	0.343954	0.0365797	0.184884	4.96209	5.0108	0.222	9.97289
COI2E-34	74.1708	0.359585	9.04148	5.63737	0.255866	0.0226559	0.199538	5.26282	5.03221	0.2107	10.295
COI2E-35	74.4821	0.350874	8.95932	5.45787	0.284482	0.0268243	0.186331	5.37308	4.83506	0.1841	10.2081
COI2E-36	74.3225	0.357057	9.06848	5.70833	0.301277	0.0344465	0.21386	5.06478	4.922	0.2021	9.98677
COI2E-37	74.3476	0.353619	9.2506	5.57226	0.274216	0.0269533	0.184719	5.07357	4.9183	0.2046	9.99187
COI2E-38	74.2554	0.345258	9.05675	5.71442	0.275852	0.0248027	0.182894	4.87728	5.24067	0.213	10.1179
COI2E-39	74.2721	0.354264	9.06543	5.7538	0.343854	0.0336254	0.1649	4.99426	5.00332	0.2018	9.99757
COI2E-40	74.2186	0.326405	8.86552	5.72049	0.430462	0.0235135	0.199659	5.09356	5.11079	0.2174	10.2044
COI2E-41	74.2669	0.325637	9.04367	5.74406	0.279916	0.0202747	0.183611	4.83573	5.29512	0.1891	10.1309
COI2E-42	74.0482	0.346306	8.88241	5.85515	0.300937	0.0322581	0.206348	5.23371	5.08522	0.216	10.3189

## Sheet: Table S9
Table S9. Trace element abundances (ppm) of tephra samples
Key: <LOD = below detection limit; SD = standard deviation
Shala 212 ka Qi2 ignimbrite unit B (sample ETH17-14B5)																										Shala 212 ka Qi2 ignimbrite unit C (sample ETH17-14C)
run	17-14B5-2	17-14B5-3	17-14B5-4	17-14B5-5	17-14B5-6	17-14B5-7	17-14B5-8	17-14B5-10	17-14B5-12	17-14B5-13	17-14B5-14	17-14B5-16	17-14B5-17	17-14B5-18	17-14B5-19	17-14B5-20	17-14B5-21	17-21B-2	17-21B-12	17-14B5-9	17-14B5-11	17-14B5-15	Average	SD		17-14C-1	17-14C-2	17-14C-3	17-14C-4	17-14C-5	17-14C-6	17-14C-7	17-14C-8	17-14C-9	17-14C-10	17-14C-11	17-14C-12	17-14C-15	17-14C-16	17-14C-17	17-14C-19	17-14C-20	Average	SD
Zn	163.71	169.06	105.93	201.16	254.66	161.57	212.93	116.63	197.95	100.58	93.09	232.19	223.63	101.65	353.1	239.68	308.16	299.6	302.81	300.67	196.88	276.06	209.623	77.5787		184.518	216.99	271.717	295.876	283.734	221.857	205.45	222.409	286.996	170.218	311.508	210.484	255.708	183.312	194.426	291.043	314.289	242.384	48.8034
Rb	132.145	108.284	108.498	114.49	102.078	100.473	110.103	88.81	110.317	104.646	101.329	106.679	116.63	112.885	98.119	110.21	101.436	137.388	130.54	116.63	109.247	103.79	110.215	11.4521		81.2914	82.6566	83.7806	89.5402	87.9051	91.0147	87.1483	81.6373	98.0739	77.5713	96.9586	79.2965	85.1232	86.4869	84.8437	87.0404	98.8157	87.0109	6.28532
Sr	11.77	3.4347	36.38	5.029	0.9309	2.7178	26.536	3.8948	1.6478	2.1079	6.2809	17.548	3.4133	3.1565	5.0718	3.7236	4.3014	1.6157	1.5301	0.8667	17.655	1.7762	7.33582	9.25201		0.574021	0.491772	0.837886	0.827609	0.848715	0.987813	0.447154	1.16766	0.876982	0.597533	0.91069	0.608534	0.633101	0.75831	0.593337	0.980209	1.05985	0.77654	0.209816
Y	78.752	98.761	83.674	106.572	100.259	84.423	115.56	64.2	104.753	98.547	94.053	106.251	118.77	108.177	90.629	117.7	108.926	112.457	104.86	110.21	108.605	110.852	101.227	13.7495		66.3558	76.0672	108.489	113.814	107.331	79.5927	77.7134	76.0907	110.617	70.8542	120.535	74.2059	77.3858	82.8604	78.3165	107.271	118.945	90.9673	19.1303
Zr	854.93	956.58	841.02	1019.71	935.18	798.22	1005.8	663.4	982.26	920.2	908.43	973.7	1155.6	1057.16	882.75	1080.7	1048.6	1022.92	959.79	1060.37	1009.01	1005.8	961.006	108.046		628.409	687.501	914.815	953.636	928.137	722.419	712.305	699.343	975.545	646.713	1027.11	668.429	682.865	720.496	670.289	932.559	1022.09	799.568	147.077
Nb	159.43	141.882	144.771	154.401	148.944	135.89	151.94	130.54	146.804	143.059	135.355	150.335	160.5	158.467	133.75	150.87	154.08	154.936	149.051	157.183	151.405	142.31	147.996	8.64696		100.915	111.412	130.95	139.646	136.371	115.97	107.472	115.553	140.958	105.389	150.426	106.651	113.351	116.934	109.867	134.446	145.658	122.469	15.971
Cs	1.2198	0.9309	0.8774	1.0486	1.0165	0.9523	0.9844	0.7918	1.0058	0.8881	0.9202	0.9416	1.1663	1.1235	0.9523	0.8239	1.1128	1.712	1.6157	1.0272	0.96407	0.7383	1.03698	0.234454		0.760198	0.779309	0.97661	0.977999	0.978381	0.904573	0.872581	0.798578	0.998346	0.656833	1.11237	0.745895	0.744244	0.850266	0.801918	1.01514	0.951965	0.877953	0.123735
Ba	17.334	11.021	14.445	11.556	9.8868	9.095	14.124	8.025	10.6037	10.165	<LOD	13.054	14.017	11.4811	11.663	11.342	13.482	20.651	20.3728	11.4918	13.696	11.77	12.8227	4.21548		9.11276	9.51269	18.8779	18.8726	18.4384	10.0002	9.79109	10.9848	19.9945	8.99475	21.9041	9.54441	10.0307	10.411	9.48542	19.2102	20.5345	13.8647	5.09857
La	105.502	116.202	103.683	128.079	117.914	106.251	129.47	85.6	125.19	115.346	117.7	127.651	144.45	131.396	109.033	130.54	140.17	130.005	121.338	134.392	123.692	124.12	121.26	13.4617		82.0683	91.5884	112.491	126.533	107.039	101.236	100.29	96.6443	114.426	86.6685	123.948	90.585	94.3261	99.683	96.9423	108.869	119.329	103.098	12.9747
Ce	241.82	242.89	234.33	281.41	255.73	219.35	284.62	199.02	255.73	253.59	242.89	267.5	315.65	274.99	234.33	283.55	280.34	261.08	249.31	279.27	257.87	276.06	258.697	25.6395		197.146	209.539	238.678	249.906	237.128	202.004	206.147	197.499	252.292	182.918	265.114	186.652	209.106	204.517	198.158	234.175	253.819	219.106	26.1273
Pr	26.001	25.894	24.717	31.672	27.285	23.326	31.244	20.223	29.211	26.108	26.322	28.676	31.779	28.783	25.038	30.816	31.458	28.355	26.4718	30.388	28.997	32.314	27.9581	3.12943		19.4155	22.7652	28.2357	30.1298	26.3855	24.015	23.1012	24.5861	29.0761	21.4649	30.8189	22.8693	22.9863	23.3572	21.8293	27.1133	30.4941	25.2143	3.51621
Nd	93.732	109.14	97.584	117.486	112.136	91.806	120.91	74.9	114.597	107.321	104.86	111.815	127.33	114.276	93.518	117.7	123.05	110.852	103.897	116.63	109.889	117.486	108.678	12.2273		75.5534	87.4438	103.996	113.859	103.834	87.2221	85.3422	90.3682	108.9	79.9627	119.656	83.1634	89.5548	91.2747	87.4099	103.269	114.453	95.6036	13.3093
Sm	18.297	19.902	18.511	25.68	20.972	17.655	24.717	13.161	22.149	20.544	20.009	22.577	26.108	22.577	21.4	26.322	25.038	23.326	22.149	23.968	21.721	23.647	21.8377	3.15517		14.4282	16.8676	21.7498	22.2048	20.3933	18.3117	16.3359	16.148	20.3488	14.3832	24.5019	15.5095	17.6745	18.4442	17.0579	19.4872	22.4194	18.6039	2.97506
Eu	1.9153	2.1935	2.1828	2.6108	2.461	2.2363	2.6964	1.7869	2.5894	2.2791	2.3219	2.6322	3.0602	2.5787	2.0972	2.6322	2.8355	3.0281	2.6536	2.9639	2.6643	2.7927	2.50964	0.34596		2.11773	2.20154	3.12076	3.2634	3.11077	2.26704	2.2221	2.08874	3.09836	2.11012	3.32588	2.07119	2.17487	2.15748	1.91726	3.08548	3.31279	2.56738	0.544395
Gd	15.515	17.976	15.836	20.651	17.5801	15.836	20.116	13.375	18.832	18.19	17.227	20.651	19.581	19.26	16.264	21.293	21.507	20.1588	19.367	19.474	18.725	20.33	18.5339	2.1336		13.3352	14.6437	19.2113	19.2624	19.9117	14.7979	15.6544	14.7224	20.4337	14.4878	22.307	14.5052	13.7818	16.2938	14.8338	20.2777	21.7456	17.0709	3.06729
Dy	15.836	19.367	15.408	22.684	18.832	16.157	22.149	10.914	18.939	17.655	18.083	21.614	24.61	21.079	16.692	23.326	22.684	21.614	20.223	20.3942	20.009	21.721	19.545	3.20033		12.7527	14.451	20.668	19.565	19.8666	13.9427	15.2384	15.0387	20.243	13.0655	22.72	14.3831	14.5715	15.9427	14.7718	20.1979	22.1657	17.0344	3.38674
Er	9.523	10.272	9.7156	13.161	11.2992	9.309	12.305	6.634	11.3741	10.1971	10.7	12.0589	13.803	12.1766	10.165	12.947	13.161	12.4869	11.7165	12.1338	12.0482	12.3585	11.343	1.65481		7.56601	9.50435	12.1326	11.9741	12.1287	8.95335	9.42497	8.79417	12.0116	7.79467	13.3149	8.15156	8.27031	9.08356	8.58432	12.1162	12.7866	10.1525	1.98471
Yb	8.881	10.593	8.5921	13.268	11.235	9.2769	12.091	7.811	10.914	10.3897	10.058	11.7807	12.626	11.6523	10.379	12.947	12.519	12.5297	11.663	10.6893	10.807	11.663	11.0166	1.45992		7.03963	8.49169	11.2427	12.5967	11.8002	8.56061	8.61195	8.75434	12.1007	7.74237	13.5026	7.83445	8.60409	9.2292	7.94803	11.357	13.0757	9.9113	2.12876
Hf	19.26	22.577	18.832	25.252	23.326	18.832	24.503	14.766	24.61	22.791	21.828	24.824	26.857	23.861	20.33	26.429	27.82	24.824	23.647	24.396	22.791	25.038	23.0634	3.07852		16.8966	18.5849	25.4315	23.2132	24.0431	17.1157	18.7977	18.9891	24.5675	16.6042	25.5536	17.3273	16.8034	18.3197	17.6176	23.3968	25.1666	20.4958	3.55089
Ta	9.1699	8.6991	8.5493	9.7263	9.2234	7.8859	9.523	6.955	9.7049	8.9666	8.4744	9.6514	11.556	9.2983	8.0678	10.379	10.5181	9.4588	9.4802	9.9082	9.2876	10.2078	9.30414	0.982347		6.01057	6.89361	8.08712	8.15375	7.97498	6.91855	7.19782	7.13774	8.56681	6.20172	9.09834	6.42152	6.49228	7.27297	6.97849	8.00909	8.64583	7.41536	0.917716
Pb	26.964	11.984	17.227	15.943	16.157	12.947	17.12	13.589	16.585	16.585	16.478	15.943	19.046	16.157	<LOD	17.548	17.013	21.079	21.186	17.334	16.906	18.511	17.2525	4.78426		11.6256	11.1818	15.7237	14.6994	16.1958	13.8242	14.0848	13.7088	15.3013	12.6836	16.4279	12.2767	14.1784	13.6124	12.376	16.1644	17.0221	14.1816	1.77397
Th	14.338	16.692	14.766	19.046	17.12	14.231	18.618	11.663	17.976	15.943	15.729	18.297	19.581	17.548	15.515	19.153	19.688	19.3135	18.4682	18.297	17.12	17.976	17.1399	2.08467		11.0132	13.5791	13.3153	13.5054	12.7376	13.6007	13.4	13.3689	13.0822	11.5128	14.088	12.6814	12.0342	14.0088	13.0926	13.3261	14.0006	13.0792	0.859767
U	4.8578	4.708	4.5154	5.778	4.6438	4.2372	4.6331	3.9483	4.5903	4.387	4.2479	4.9327	5.35	4.7508	4.0981	5.0611	5.3072	4.8471	4.6759	5.1574	4.6224	5.2216	4.75323	0.442406		3.58117	3.66979	3.88624	3.7846	3.49998	3.92396	4.0282	3.92981	3.88079	3.10787	3.96047	3.54909	3.23047	3.96848	3.45382	3.72286	4.05024	3.71928	0.279676
La/Th	7.35821	6.96154	7.02174	6.72472	6.8875	7.46617	6.95402	7.33945	6.96429	7.2349	7.48299	6.97661	7.37705	7.4878	7.02759	6.81564	7.11957	6.7313	6.5701	7.34503	7.225	6.90476	7.08982	0.270015		7.45181	6.74481	8.44824	9.36903	8.40336	7.44343	7.48435	7.22906	8.74667	7.52803	8.7981	7.14313	7.83816	7.11572	7.40435	8.16962	8.52316	7.873	0.734276
Zr/Rb	6.46964	8.83399	7.75148	8.90654	9.16143	7.94462	9.13508	7.46988	8.90398	8.79346	8.96515	9.12738	9.90826	9.36493	8.99673	9.80583	10.3376	7.44548	7.35246	9.09174	9.23604	9.69072	8.75874	0.960028		7.73033	8.31756	10.9192	10.6504	10.5584	7.93738	8.17349	8.56647	9.94704	8.33701	10.5932	8.42948	8.02208	8.33069	7.90028	10.7141	10.3433	9.14532	1.22758
Zr/Y	10.856	9.68581	10.0512	9.56827	9.32764	9.45501	8.7037	10.3333	9.37692	9.33768	9.6587	9.16415	9.72973	9.7725	9.74026	9.18182	9.62672	9.0961	9.15306	9.62136	9.29064	9.07336	9.53654	0.463842		9.47029	9.03808	8.43231	8.3789	8.64741	9.07645	9.16579	9.19091	8.81915	9.12738	8.52125	9.00776	8.82417	8.6953	8.55872	8.69346	8.59292	8.83766	0.309547
Nb/Th	11.1194	8.5	9.80435	8.10674	8.7	9.54887	8.16092	11.1927	8.16667	8.97315	8.60544	8.21637	8.19672	9.03049	8.62069	7.87709	7.82609	8.02216	8.07068	8.59064	8.84375	7.91667	8.73134	0.940651		9.16308	8.20468	9.83457	10.34	10.7061	8.52672	8.02036	8.64345	10.7748	9.15409	10.6775	8.41005	9.41907	8.34718	8.3915	10.0889	10.4037	9.35917	0.988811
Kibish KHS tuff (sample ETH18-01)
run	KHS-1	KHS-2	KHS-3	KHS-4	KHS-5	KHS-6	KHS-7	KHS-8	KHS-9	KHS-10	KHS-11	KHS-12	KHS-13	KHS-14	KHS-15	KHS-16	KHS-17	KHS-18	Average	SD
Rb	87.6	127.68	81.6	123.6	115.2	120	128.4	120.72	125.04	115.2	140.76	117.12	94.8	114	116.04	135	105.24	118.8	115.933	15.3612
Sr	0.864	0.936	0.828	0.816	0.984	1.956	0.564	1.308	0.6	1.104	1.536	0.876	0.72	0.792	0.732	0.888	1.872	0.852	1.01267	0.401768
Y	92.4	108.48	98.4	115.32	115.32	121.2	113.76	140.28	115.08	116.4	126.84	118.32	80.52	114	101.16	127.8	103.08	116.4	112.487	13.7987
Zr	816	1035.6	1056	996	1021.2	1176	1166.4	1332	1046.4	996	1326	1056	795.6	1090.8	981.6	1172.4	1029.6	1092	1065.87	139.437
Nb	136.8	170.4	166.8	175.2	171.6	142.8	174	199.2	172.8	147.6	197.04	183.6	107.04	169.2	157.2	193.92	172.8	170.4	167.133	22.6704
Cs	0.876	1.104	0.924	1.128	1.224	1.164	0.996	1.188	1.188	0.876	1.224	0.96	0.828	0.888	0.936	1.38	0.9	1.176	1.05333	0.161551
Ba	12.36	14.4	15.24	15.6	14.76	18	10.872	12.24	14.04	13.92	16.2	15.24	7.68	13.68	14.4	15.12	14.532	13.92	14.0113	2.22999
La	92.4	127.08	115.2	139.2	130.32	124.8	138.72	158.4	132	134.4	150.72	132	92.64	134.76	121.44	146.04	122.4	135.6	129.34	17.0167
Ce	170.4	267.6	265.2	286.8	274.8	325.2	284.4	337.2	286.8	265.2	324	279.6	192	288	262.8	309.6	271.2	297.6	277.133	41.4539
Pr	22.44	29.88	29.88	31.92	31.92	30.36	32.04	37.32	33.96	31.8	37.68	33.72	23.04	33.72	31.92	33.96	29.64	33.48	31.5933	3.9285
Nd	92.4	114.84	106.8	132	125.52	130.8	115.32	141.6	127.2	132	138.48	118.68	84.12	127.2	119.64	141	113.76	133.2	121.92	15.7339
Sm	20.16	22.32	23.28	28.08	24.36	26.88	26.4	31.56	24.84	26.4	28.44	26.04	17.4	26.28	24.24	28.08	22.2	26.64	25.2	3.3092
Eu	2.112	2.856	2.496	3.084	2.964	3.852	2.916	3.168	3.3	2.832	3.228	2.868	0.804	3.504	2.724	3.528	2.712	3.012	2.88667	0.655463
Gd	17.52	21	18.96	22.08	21.84	23.88	19.08	26.64	22.08	23.16	23.16	21.24	15.12	21.96	19.56	24.36	19.44	22.2	21.2933	2.69721
Dy	15.48	20.52	20.64	23.16	22.08	20.4	23.16	26.88	22.08	24.12	21.72	21.72	16.2	20.52	21.36	24.12	20.52	24.12	21.6	2.70967
Er	8.64	12.12	11.64	12.48	11.52	13.32	12.528	14.88	13.188	12.12	14.268	12.96	9.132	12.96	11.748	13.8	11.928	12.48	12.3173	1.54491
Yb	9.24	10.752	11.16	13.2	12.696	12	11.496	14.88	12.84	11.76	14.88	12.96	8.88	12.84	10.428	13.92	11.856	12.24	12.1127	1.65885
Hf	15.72	23.52	22.68	26.04	25.32	24.84	26.4	32.04	26.16	25.92	30	24.12	18.84	27.12	23.04	25.92	24.24	26.52	24.9133	3.63212
Ta	7.2	10.536	9.072	10.572	10.2	10.68	10.752	13.08	10.824	11.04	12.396	10.464	6.72	10.764	9.864	11.652	10.128	10.92	10.3813	1.53243
Pb	12.24	18.96	12.6	17.16	18.6	15	20.88	24.72	20.52	15.12	22.2	19.68	16.92	17.28	19.08	20.4	16.56	20.4	18.24	3.22939
Th	11.52	17.76	17.04	18.24	18.96	20.04	20.64	24.48	19.32	19.68	22.92	18	12.396	20.04	17.64	20.64	18.36	19.2	18.7153	3.07615
U	3	5.088	4.74	4.8	6.012	3.528	5.244	6.324	5.436	4.92	6.42	4.656	3.108	5.688	4.86	5.46	4.812	5.664	4.98667	0.976406
La/Th	8.02083	7.15541	6.76056	7.63158	6.87342	6.22754	6.72093	6.47059	6.8323	6.82927	6.57592	7.33333	7.47338	6.72455	6.88435	7.07558	6.66667	7.0625	6.96215	0.437227
Zr/Rb	9.31507	8.1109	12.9412	8.05825	8.86458	9.8	9.08411	11.0338	8.36852	8.64583	9.42029	9.01639	8.39241	9.56842	8.45915	8.68444	9.78335	9.19192	9.26326	1.17071
Zr/Y	8.83117	9.54646	10.7317	8.63684	8.85536	9.70297	10.2532	9.4953	9.09281	8.5567	10.4541	8.92495	9.88077	9.56842	9.70344	9.17371	9.98836	9.38144	9.48765	0.622124
Nb/Th	11.875	9.59459	9.78873	9.60526	9.05063	7.12575	8.43023	8.13725	8.9441	7.5	8.59686	10.2	8.63504	8.44311	8.91156	9.39535	9.41176	8.875	9.0289	1.05231
Gademotta 191 ka Unit D (sample ETH17-20)
run	17-20-UD-1	17-20-UD-2	17-20-UD-3	17-20-UD-4	17-20-UD-5	17-20-UD-6	17-20-UD-8	17-20-UD-9	17-20-UD-10	17-20-UD-11	17-20-UD-12	17-20-UD-13	17-20-UD-14	17-20-UD-15	17-20-UD-16	17-20-UD-17	17-20-UD-18	17-20-UD-19	17-20-UD-20	17-20-U10-5	17-20-U10-6	17-20-U10-7	17-20-U10-8	17-20-U10-9	17-20-U10-10	17-20-U10-11	17-20-U10-12	17-20-U10-13	17-20-U10-14	17-20-U10-15	17-20-U10-16	17-20-U10-17	17-20-U10-18	17-20-U10-19	17-20-U10-20	17-20-U10-21	Average	SD
Rb	125.832	122.515	122.408	123.05	120.375	122.408	126.474	127.865	116.737	95.016	95.23	129.363	106.037	104.753	104.967	126.474	120.375	129.042	128.614	124.227	122.515	100.045	118.128	119.412	111.387	141.24	125.19	105.288	121.231	123.478	112.136	122.408	119.947	121.445	114.49	123.799	118.719	10.1654
Sr	0.86884	0.9737	0.9095	0.9523	1.07	1.21766	0.8453	1.4231	1.0058	4.3977	10.1222	1.0165	4.5689	4.601	4.28	0.92983	0.91485	0.8453	0.9951	1.0914	0.9309	4.1516	2.5466	1.7655	7.3081	1.4552	1.07	3.8627	0.9416	1.8939	0.8346	2.0116	2.0223	2.1721	0.8346	0.963	2.16092	2.05945
Y	86.242	85.707	86.777	93.304	80.464	89.024	96.3	96.835	87.954	97.905	104.432	92.234	116.309	116.951	117.165	91.806	89.024	89.987	91.592	96.728	93.518	106.679	85.172	84.53	79.18	105.502	96.193	110.531	86.028	92.448	88.168	82.176	82.604	84.423	84.316	92.769	93.3605	10.264
Zr	801.43	820.69	811.06	897.73	796.08	837.81	891.31	912.71	822.83	888.1	910.57	849.58	1033.62	1036.83	1037.9	835.67	819.62	809.99	819.62	882.75	858.14	944.81	778.96	758.63	692.29	995.1	883.82	1019.71	776.82	831.39	770.4	754.35	751.14	785.38	751.14	862.42	853.622	88.339
Nb	118.77	116.844	114.918	125.832	121.659	112.885	121.124	127.865	112.457	111.066	136.853	123.05	126.688	121.98	124.655	120.161	119.198	116.309	116.416	119.947	121.659	117.914	110.103	110.424	102.72	143.38	126.902	125.618	111.494	124.655	115.56	118.984	118.021	121.659	111.066	126.153	119.861	7.69953
Cs	1.32894	1.17379	1.2412	1.16202	1.2733	1.2626	1.2412	1.3375	1.12885	0.89238	0.96193	1.1556	0.98333	1.00901	1.07	1.26153	1.20161	1.3054	1.24227	1.1128	1.09782	0.91913	1.1663	1.17165	0.9523	1.4445	1.2412	1.00901	1.1342	1.3589	1.1449	1.177	1.1449	1.1449	1.1128	1.22301	1.16077	0.128266
Ba	19.0674	20.5654	20.223	37.557	27.071	30.816	22.042	31.244	24.503	475.08	647.35	25.573	480.43	483.64	493.27	18.7999	29.318	19.0781	18.7892	32.314	35.524	450.47	61.846	47.829	29.425	34.775	37.878	325.28	24.0964	31.137	32.421	64.521	62.809	32.207	22.684	36.808	119.068	184.052
La	100.687	99.831	98.654	104.325	91.271	99.724	106.893	107	101.543	93.09	104.967	108.177	107.749	108.926	108.07	103.469	99.189	100.259	101.329	104.86	103.148	100.045	94.588	93.197	89.559	116.63	106.572	107.321	98.226	101.543	105.823	96.835	95.337	97.691	95.016	105.395	101.582	5.8229
Ce	215.177	208.65	204.905	216.461	187.785	201.16	221.383	220.206	203.835	202.23	227.054	226.84	232.083	228.659	232.297	211.539	204.263	210.576	211.004	218.815	211.432	212.074	195.275	193.028	172.27	243.96	218.28	224.7	200.839	205.333	211.86	214	206.51	207.152	197.201	216.568	211.539	13.7961
Pr	23.1762	23.0478	22.47	23.8503	20.544	22.256	23.7861	23.9466	22.7589	22.791	25.6265	24.931	26.4932	26.6002	26.7072	23.1013	22.3416	23.1976	23.005	23.861	23.0799	24.3639	21.5712	21.2074	20.33	26.322	24.4495	26.108	22.684	23.8396	23.54	23.647	23.219	22.149	22.577	24.3746	23.5543	1.60659
Nd	89.452	89.345	88.382	92.02	77.682	88.061	96.835	96.407	89.88	94.16	103.897	94.802	111.28	112.778	110.531	93.197	90.95	93.411	94.802	95.658	93.839	99.938	88.489	86.028	78.431	106.358	97.477	105.93	91.057	93.518	95.979	91.057	89.238	92.02	90.522	96.835	94.4513	7.90405
Sm	18.0402	17.9974	17.12	18.6715	17.12	17.334	19.474	20.116	19.474	20.544	21.293	19.046	23.326	23.968	23.005	18.3933	17.548	18.7571	18.939	19.046	18.9176	21.507	17.655	18.0295	16.692	23.754	19.581	21.614	18.0616	18.618	18.618	17.976	16.371	17.655	18.19	19.795	19.2291	1.98332
Eu	2.1186	2.1828	2.14	2.6108	2.1828	2.3005	2.3968	2.568	2.3219	3.9269	4.9434	2.2791	4.3763	4.5368	4.5582	2.14	2.3433	2.0544	2.0865	2.6429	2.5038	4.0981	2.0758	2.0544	2.2256	3.2207	2.5894	3.8199	2.1935	2.675	2.3647	2.14	2.2577	2.5252	2.2577	2.4717	2.72731	0.843263
Gd	16.6064	16.4352	16.264	17.0344	14.338	16.157	17.6443	17.4517	16.5208	19.367	19.4419	17.12	21.8387	21.7424	21.7531	16.6278	16.3496	16.0607	16.2854	17.548	16.7883	21.1432	15.0335	15.2475	12.84	19.046	16.9381	20.758	16.0928	16.2212	15.943	15.836	15.194	15.2475	15.3759	16.8311	17.1423	2.1642
Dy	16.2212	17.0665	15.943	17.1093	15.729	16.799	18.1686	17.6764	17.334	19.0032	20.3942	17.655	22.1597	22.5342	22.6947	17.1628	16.5529	17.013	17.3661	17.8476	17.2698	20.865	15.943	15.5471	15.515	20.972	17.4089	21.721	16.7241	17.013	16.3175	15.9109	15.9323	15.7504	16.2961	17.0986	17.7421	2.1101
Er	9.3304	9.5551	9.5337	10.1222	9.0094	9.5979	10.5395	10.5823	9.9296	10.593	11.4811	10.2934	12.5297	12.7651	13.1503	10.1971	9.8119	9.4588	9.6835	10.7214	10.3362	11.984	9.3946	9.1271	7.3081	11.77	10.3148	12.1659	9.2983	9.8761	10.1008	9.3304	9.2341	9.5444	8.9666	10.4218	10.2239	1.21649
Yb	8.8168	9.0843	9.2555	9.9938	8.3781	9.202	9.8012	10.0473	9.4802	9.844	10.5181	9.8975	11.8984	12.1124	11.9947	9.6621	9.523	9.3197	8.8917	10.9782	10.2613	11.0531	9.1378	8.6349	8.132	12.305	10.3148	11.4169	9.1913	10.1222	9.8547	8.9987	9.1806	9.4695	8.7312	10.2506	9.88204	1.07199
Hf	18.725	19.6773	18.939	20.9185	17.869	19.153	21.2074	21.4856	19.4098	20.972	21.9992	20.544	25.145	25.252	25.787	20.4798	19.9876	19.5489	19.581	21.721	21.1967	22.791	18.4896	18.4575	15.515	26.001	21.293	25.466	18.8962	20.4905	19.367	18.297	18.3826	20.758	19.2814	20.651	20.6593	2.41497
Ta	7.2011	7.169	6.7731	7.5542	6.9443	6.7838	7.5221	7.704	6.8801	6.9978	8.4851	7.3295	7.6398	7.8966	7.8752	7.3188	7.1369	7.1048	7.0406	7.6933	7.6719	7.276	6.741	6.5377	5.5747	8.2069	7.9287	8.0571	6.8373	7.3188	7.276	7.0834	7.0085	7.3723	6.8801	7.6826	7.29175	0.54009
Pb	20.33	20.0197	18.618	18.7785	19.26	17.441	20.223	21.293	19.581	15.194	13.589	21.614	16.157	16.692	16.371	20.758	19.046	19.581	20.544	22.256	18.832	15.836	19.795	17.227	17.655	24.396	18.404	15.1084	19.046	19.046	21.507	19.688	19.367	19.367	18.939	19.153	18.9087	2.18388
Th	16.3817	16.3282	15.622	16.4566	14.1561	16.05	17.762	17.5694	16.585	12.8721	13.4392	16.906	15.3545	15.6969	15.6862	16.6278	16.2961	16.264	16.8846	17.5373	16.7455	15.1512	16.0821	15.4508	13.696	20.758	17.548	16.1463	16.1142	16.8739	16.2747	16.5636	15.2154	15.729	15.5899	16.8418	16.146	1.36593
U	3.9376	3.8627	3.7771	4.173	3.8948	3.7129	3.8841	4.3763	3.6166	3.6487	3.8092	3.9483	3.8413	4.0981	4.0125	3.9376	4.0446	3.7878	3.7557	4.0232	4.0981	3.8841	3.5952	3.5952	3.1351	4.8685	4.0446	4.1302	3.5096	3.9697	4.1409	3.8841	3.9055	3.6915	3.745	4.2158	3.90431	0.284821
La/Th	6.14631	6.11402	6.31507	6.3394	6.44747	6.21333	6.01807	6.09013	6.12258	7.23192	7.81051	6.39873	7.01742	6.93933	6.8895	6.22265	6.08667	6.16447	6.00127	5.97926	6.15974	6.60311	5.88157	6.03186	6.53906	5.61856	6.07317	6.64679	6.09562	6.01776	6.5023	5.84625	6.26582	6.21088	6.09472	6.25794	6.31648	0.427627
Zr/Rb	6.36905	6.69869	6.62587	7.29565	6.61333	6.84441	7.04738	7.13808	7.04858	9.34685	9.5618	6.56741	9.74773	9.89785	9.88787	6.60745	6.80889	6.27695	6.37271	7.10594	7.00437	9.44385	6.5942	6.35305	6.21518	7.04545	7.05983	9.68496	6.40777	6.7331	6.87023	6.16259	6.26227	6.46696	6.56075	6.96629	7.26926	1.22493
Zr/Y	9.2928	9.57553	9.34649	9.62156	9.89362	9.41106	9.25556	9.42541	9.35523	9.07104	8.71926	9.21114	8.88684	8.86551	8.85845	9.10256	9.20673	9.00119	8.9486	9.12611	9.1762	8.85657	9.14573	8.97468	8.74324	9.43205	9.18799	9.22556	9.02985	8.99306	8.73786	9.17969	9.09326	9.30292	8.90863	9.29642	9.15162	0.261743
Nb/Th	7.25016	7.15596	7.35616	7.64629	8.5941	7.03333	6.81928	7.27771	6.78065	8.62843	10.1831	7.27848	8.25087	7.77096	7.94679	7.22651	7.31451	7.15132	6.8948	6.83954	7.26518	7.78249	6.84631	7.14681	7.5	6.90722	7.23171	7.77999	6.91899	7.38744	7.10059	7.18346	7.75668	7.73469	7.12423	7.49047	7.45987	0.65602
Konso unit TA-56 (sample ETH18-14A)
run	3.18-14A-15	3.18-14A-17	3.18-14A-18	3.18-14A-22	3.18-14A	3.18-14A	3.18-14A	3.18-14A	3.18-14A	3.18-14A	Average	SD
Zn	338.403	320.909	176.588	236.519	256.011	196.281	197.525	203.635	312.932	314.014	255.282	61.4806
Rb	96.9349	98.1438	129.48	100.148	151.446	141.767	157.911	107.238	100.181	99.0191	118.227	24.3994
Sr	1.32087	1.42865	3.61035	2.55788	3.07891	4.59967	3.6838	3.84325	1.48535	3.19924	2.8808	1.14466
Y	141.26	138.289	175.464	141.643	205.404	197.035	214.827	145.352	139.004	141.654	163.993	31.038
Zr	1195.81	1214.26	1531.71	1231.69	1784.33	1707.93	1854.46	1255.03	1246.34	1259.12	1428.07	264.056
Nb	169.267	170.26	220.532	171.926	257.422	241.17	261.635	181.506	169.484	179.511	202.271	38.6885
Cs	1.15338	1.11504	1.69286	1.14878	1.51211	1.75475	1.80585	1.12232	1.20069	1.18391	1.36897	0.288275
Ba	26.7804	29.1866	57.3416	30.3032	46.1563	45.401	44.8976	73.076	29.8491	32.7451	41.5737	14.9162
La	134.881	137.437	169.568	136.09	203.016	192.631	212.071	138.339	136.846	139.422	160.03	31.3732
Ce	280.131	293.927	360.985	289.78	421.812	396.786	448.724	298.33	286.927	290.119	336.752	64.4152
Pr	33.9066	34.1024	42.5577	34.4736	48.5911	47.3226	52.1256	35.5326	34.5295	34.4001	39.7542	7.18092
Nd	126.943	131.039	161.275	130.104	190.358	178.313	197.346	134.741	130.64	132.211	151.297	27.8756
Sm	28.0718	27.3625	35.2044	27.7859	38.7997	38.2166	40.7243	28.4664	27.9321	27.2034	31.9767	5.55774
Eu	3.79459	3.90395	4.8868	3.90277	5.50355	5.26806	6.14283	4.29647	3.94635	3.98619	4.56316	0.83181
Gd	25.2496	25.2539	30.7607	24.8894	36.0365	34.3054	39.6688	25.8753	25.7802	25.8191	29.3639	5.46201
Dy	25.6688	25.2231	30.4641	26.2463	36.9848	35.3048	39.1994	26.4246	26.3104	26.4164	29.8243	5.3372
Er	15.3647	15.2992	19.0226	15.1486	21.5643	20.9149	23.3658	15.6098	15.0505	16.0167	17.7357	3.18075
Yb	14.2249	14.8565	17.8483	14.4313	20.485	20.0528	21.2795	14.8368	15.0803	14.4863	16.7582	2.85758
Hf	29.2439	29.4856	36.885	30.956	41.2965	40.1401	45.7227	29.3633	29.5803	30.9109	34.3584	6.13043
Ta	9.65729	9.69929	12.0475	9.92402	14.0559	13.9271	15.0047	9.75466	10.0125	10.2436	11.4327	2.1323
Pb	17.0866	16.661	19.8261	17.0479	25.1565	22.9672	25.2021	15.4672	17.5988	20.7329	19.7746	3.60832
Th	14.8545	15.435	18.1041	15.3196	20.8422	20.5253	23.2353	14.6718	15.8604	15.8775	17.4726	3.03519
U	4.34731	4.06576	5.57417	4.57763	5.73078	6.02772	6.72192	4.07388	4.45048	4.29674	4.98664	0.943668
La/Th	9.08017	8.90427	9.36627	8.88341	9.74061	9.38502	9.12707	9.42887	8.62811	8.78113	9.13249	0.344935
Zr/Rb	12.3362	12.3723	11.8296	12.2987	11.782	12.0474	11.7437	11.7033	12.4408	12.7159	12.127	0.352606
Zr/Y	8.46534	8.7806	8.72947	8.69574	8.68695	8.66813	8.63235	8.63443	8.96618	8.88866	8.71478	0.140146
Nb/Th	11.395	11.0308	12.1813	11.2226	12.351	11.7498	11.2602	12.371	10.686	11.306	11.5554	0.58164
177 ka Corbetti ignimbrite (COI2E)
run	COI2E-2	COI2E-3	COI2E-4	COI2E-5	COI2E-6	COI2E-7	COI2E-8	COI2E-9	COI2E-10	COI2E-11	COI2E-12	COI2E-13	COI2E-14	COI2E-15	COI2E-17	COI2E-18	COI2E-19	COI2E-20	COI2E-21	CO12E-b-1	CO12E-b-2	Average	SD
Zn	355.164	345.083	359.783	344.233	351.771	340.935	342.917	373.866	351.231	343.364	351.478	342.721	336.879	358.188	357.981	354.637	318.587	343.553	352.402	508.062	414.764	359.409	38.5115
Rb	107.215	151.517	105.197	108.166	103.59	132.777	107.51	115.686	104.004	110.026	120.696	101.927	143.507	106.47	112.692	135.068	102.202	104.359	109.692	109.662	121.87	114.944	14.2529
Sr	1.02946	1.5211	1.36199	1.05767	1.26448	1.28431	2.163	1.36973	1.11208	1.33098	1.4136	1.0828	1.5982	0.961	1.37422	1.41516	1.74002	1.2809	1.03359	1.1051	1.08723	1.31365	0.28276
Y	144.079	139.819	141.162	142.015	144.784	137.426	142.309	143.603	139.981	134.095	138.921	138.184	137.748	140.807	136.733	136.718	136.355	137.137	140.043	143.344	143.27	139.93	2.99716
Zr	1249.22	1227.88	1241.1	1223.99	1232.77	1220.26	1233.2	1236.95	1216.88	1167.24	1202.25	1214.05	1215.76	1257.19	1192.04	1203.94	1226.03	1192.36	1236	1244.84	1280.79	1224.51	25.027
Nb	175.298	171.853	172.592	175.428	175.325	171.892	178.369	173.675	173.382	164	170.242	173.88	168.959	175.381	170.872	171.466	175.784	166.802	181.71	188.12	188.737	174.465	6.00081
Cs	1.21821	2.73078	1.32048	1.32452	1.33078	1.5069	1.32879	1.46366	1.33763	1.22135	1.32262	1.31336	1.83139	1.38114	1.60538	1.94075	1.24432	1.19729	1.30071	1.37064	1.36129	1.45962	0.347465
Ba	24.8386	30.2697	28.8183	24.0742	28.5961	28.0934	25.4718	28.4932	24.3082	27.9004	28.63	23.7824	28.4677	25.4041	29.2398	28.8458	28.5582	28.23	24.6203	26.0539	26.6528	27.1119	2.00107
La	141.692	141.216	139.366	139.79	140.782	137.077	141.377	139.161	140.205	132.877	138.762	137.48	137.598	140.522	136.164	137.137	138.536	136.963	140.424	145.068	146.488	139.461	2.97812
Ce	292.488	284.569	287.519	294.472	291.112	287.812	318.362	292.258	297	283.835	289.258	289.738	295.471	296.483	289.806	291.564	298.276	285.731	301.836	311.423	315.307	294.968	9.6109
Pr	35.8749	34.7712	34.9887	35.1582	34.8702	34.4234	35.6979	35.3403	35.2805	33.9993	34.4571	34.6748	33.8353	35.1509	34.3213	34.6984	34.5031	34.617	34.9128	35.1412	36.5976	34.9197	0.634222
Nd	134.394	130.884	133.015	133.825	133.054	131.446	136.436	134.392	133.606	127.574	135.198	130.199	128.431	136.56	127.229	130.147	132.598	131.225	131.89	138.046	141.846	132.952	3.52819
Sm	28.7315	28.8583	29.5233	28.4578	28.741	28.3448	28.0647	28.8046	28.6086	27.0751	28.489	27.8377	26.8317	30.1372	28.9906	28.0159	28.6358	28.604	28.5858	28.2952	29.9622	28.5521	0.780202
Eu	3.99663	3.92322	3.8783	4.01063	4.13531	3.97345	4.06322	3.86349	3.96828	3.9111	3.95704	3.7617	4.23358	4.25392	3.89314	3.9828	3.79406	3.77314	4.09426	4.14208	4.19671	3.99077	0.145021
Gd	26.2619	25.119	25.9827	25.7322	26.0425	24.8384	25.3102	25.4649	26.767	23.8876	26.0284	25.4918	26.6937	26.5477	25.4324	25.5794	26.0126	26.3349	25.9594	26.2815	26.837	25.8383	0.705856
Dy	26.8457	26.3595	26.6756	26.9579	27.0043	26.0973	26.994	26.2747	25.6407	25.0806	26.661	25.7039	26.3957	26.8705	26.6747	26.4028	25.7695	26.0734	25.723	27.2278	27.5083	26.4258	0.609997
Er	16.3718	15.7398	16.4775	15.7414	15.8337	15.5816	16.2458	16.1934	16.1274	15.6886	15.8502	15.4538	15.3753	16.1234	15.53	16.0518	15.6703	16.2955	15.3446	15.7198	15.8346	15.8691	0.334355
Yb	15.2164	15.2912	14.6065	14.8569	15.4584	14.7547	14.9235	14.9942	14.7881	14.0232	14.6701	14.6357	15.4486	14.3967	14.469	15.2136	14.4611	13.8569	14.7156	15.4897	15.7007	14.8557	0.484161
Hf	30.9879	30.9545	30.6137	30.7589	30.5773	29.5014	30.4613	31.0188	30.6642	28.0335	29.9604	29.9148	29.9259	30.8994	29.6798	29.3939	30.3997	29.9323	30.2781	30.325	31.724	30.286	0.770585
Ta	10.238	10.0362	10.1303	10.2954	9.96473	10.0477	10.4303	10.5504	10.2582	9.74206	10.1784	10.0453	9.98538	10.487	10.3175	10.2568	10.811	10.2177	10.4908	10.6332	11.1027	10.2961	0.31194
Pb	18.3974	23.3924	25.4893	17.3069	17.8336	26.3986	18.0106	26.5588	18.4324	17.5866	22.2009	17.0164	25.6923	19.4259	29.0094	30.6671	19.7777	19.9408	17.6614	20.4387	20.2447	21.4991	4.19742
Th	16.7475	15.7226	16.1172	16.3392	15.6306	15.3711	16.6221	16.3232	16.1227	15.2403	15.569	16.2563	15.1186	16.8903	15.6408	16.0375	15.4733	15.9061	16.2112	16.5945	17.3422	16.0608	0.580508
U	4.83843	4.50857	4.54265	4.68743	4.58984	4.34981	4.83525	4.72916	4.6413	4.50318	4.3896	4.53746	5.01596	4.97175	4.45725	4.50934	4.29546	4.5095	4.70308	5.06288	4.87845	4.64554	0.220198
La/Th	8.4605	8.98172	8.64704	8.55551	9.00682	8.91785	8.50533	8.52535	8.69613	8.71875	8.91275	8.45706	9.10126	8.31965	8.70569	8.55101	8.95324	8.61073	8.66214	8.74192	8.44691	8.6894	0.216788
Zr/Rb	11.6516	8.10391	11.7979	11.3158	11.9005	9.1903	11.4706	10.6924	11.7003	10.6088	9.96099	11.9109	8.47178	11.8079	10.5779	8.91359	11.9962	11.4256	11.2678	11.3516	10.5095	10.7917	1.19953
Zr/Y	8.67042	8.78189	8.79198	8.61873	8.51454	8.8794	8.6657	8.61371	8.69318	8.70459	8.65423	8.78574	8.82597	8.92845	8.71807	8.806	8.99147	8.69464	8.82581	8.68429	8.9397	8.75183	0.120224
Nb/Th	10.4672	10.9303	10.7086	10.7366	11.2168	11.1828	10.7308	10.6398	10.7539	10.7609	10.9347	10.6962	11.1756	10.3835	10.9248	10.6915	11.3605	10.4867	11.2089	11.3363	10.8831	10.8671	0.286776
Kibish unit 18-8 (sample ETH18-8)
run	18-8-2	18-8-3	18-8-4	18-8-6	18-8-9	18-8-10	18-8-11	18-8-13	18-8-14	18-8-15	18-8-16	18-8-17	18-8-18	18-8-20	18-8-21	18-8-22	18-8-23	Average	SD
Zn	397.315	396.727	446.455	321.457	441.472	326.269	447.807	373.433	449.504	400.077	304.622	355.408	446.113	370.891	435.614	390.682	379.981	393.166	47.4106
Rb	116.163	116.988	113.897	116.936	113.23	80.9178	114.735	116.628	117.103	114.846	81.4676	114.659	117.281	115.142	113.837	114.625	113.848	111.312	11.4114
Sr	1.54993	1.58033	1.70278	1.86279	1.5715	1.86843	1.44034	1.53764	1.50593	1.61116	1.94222	1.68732	1.58275	1.51286	1.47256	1.38801	1.49268	1.60642	0.157789
Y	148.87	150.108	150.279	143.048	149.767	102.205	147.742	144.421	147.912	147.808	104.029	146.883	148.104	144.014	143.895	147.933	146.128	141.95	14.7836
Zr	1302.03	1301.97	1310.44	1234.56	1294.44	886.333	1289.86	1266.91	1306.64	1294.36	890.286	1277.03	1287.14	1264.94	1271.49	1297.92	1268.29	1237.92	132.975
Nb	187.784	189.286	188.291	182.094	192.34	135.629	187.931	185.371	188.177	189.551	134.791	183.356	192.907	185.094	182.549	187.44	189.882	181.322	17.6214
Cs	1.31217	1.32284	1.34391	1.36134	1.34158	0.887476	1.33416	1.34609	1.33616	1.27356	0.872999	1.34395	1.31397	1.32329	1.27716	1.33077	1.29047	1.27129	0.149187
Ba	30.6828	30.8759	31.1843	33.2975	30.9686	53.0741	30.7443	30.1423	30.7686	31.0087	52.8938	30.8788	30.8912	30.1451	30.2924	31.0434	30.8001	33.5113	7.36112
La	150.284	150.532	149.119	139.269	149.056	102.099	148.046	144.165	148.537	150.538	104.114	146.715	150.251	144.545	146.942	149.414	146.24	142.345	15.0536
Ce	311.83	312.907	314.463	296.844	320.396	218.494	317.37	305.414	317.872	321.172	221.732	308.244	320.723	304.145	306.752	314.423	309.939	301.336	31.2711
Pr	37.129	37.804	37.7376	34.7183	36.7932	25.2519	36.9395	35.2384	36.0398	36.6507	25.9446	36.5756	37.0166	35.6004	36.0741	36.7776	36.313	35.212	3.70824
Nd	140.908	144.623	143.944	136.031	145.47	100.38	143.029	140.518	144.342	145.635	100.1	142.245	145.292	137.887	141.617	143.403	141.774	137.482	14.2573
Sm	29.2682	30.4875	30.2908	27.6604	29.8689	20.6652	29.1074	29.2473	30.3126	29.5714	20.6177	29.0228	30.1082	28.1317	29.2999	29.1617	29.2856	28.3593	2.99535
Eu	4.22338	4.43021	4.32546	4.10837	4.1985	3.31383	4.23883	4.20509	4.22877	4.37619	3.2821	4.29865	4.33622	4.14329	4.14267	4.21197	4.22714	4.13475	0.326171
Gd	26.4684	27.0816	27.4962	25.7786	26.5291	19.337	27.0048	26.1043	27.6266	27.2567	18.8577	26.4923	27.6954	26.021	26.1937	26.6074	26.5216	25.8278	2.5969
Dy	27.6831	28.9365	28.3615	25.7885	27.8017	19.5872	28.2212	26.9486	28.0194	29.1644	19.5867	27.1319	28.345	26.8964	26.8234	28.3396	27.225	26.7565	2.82854
Er	16.3601	16.4509	16.5915	15.3318	16.6185	11.4399	16.4121	15.9343	16.1254	16.6345	11.4455	15.5949	16.5912	15.6709	16.0232	16.6422	15.5768	15.6143	1.62648
Yb	15.3048	16.0203	16.0291	14.7913	15.9407	11.1548	15.6887	15.1556	16.0336	16.048	11.1934	15.5693	16.0731	15.2191	15.4696	16.3155	15.4794	15.1463	1.54926
Hf	31.918	32.5851	32.0237	29.9063	31.9607	22.7016	32.2043	31.1724	32.2632	32.7476	21.8219	30.6296	32.4415	31.1733	31.0749	32.7491	30.7339	30.5945	3.24364
Ta	10.7291	10.925	10.9692	10.2594	11.0962	7.58206	10.9292	10.7119	10.9951	11.0252	7.60874	10.529	11.12	10.623	10.6995	11.0676	10.5527	10.4366	1.09509
Pb	19.8505	20.3043	20.5791	19.2039	20.6518	14.5602	20.3032	20.181	21.5293	20.8392	13.4916	20.0179	20.8841	20.9401	20.5939	19.3376	19.8785	19.5968	2.18425
Th	16.4367	17.0406	17.0502	15.5854	16.8469	10.8371	16.7729	16.4007	16.7967	16.7256	10.9399	16.2827	17.0334	16.2552	16.6202	16.8486	16.1314	15.9179	1.93109
U	4.70945	4.71763	4.78183	4.53141	4.85309	3.2276	4.70804	4.82588	4.86239	4.91734	3.20345	4.53911	4.97597	4.72363	4.82307	4.82381	4.73236	4.58565	0.528438
La/Th	9.14319	8.83374	8.74589	8.93584	8.84767	9.42129	8.82651	8.7902	8.8432	9.00042	9.51691	9.01051	8.821	8.89225	8.84117	8.86802	9.06552	8.9649	0.216967
Zr/Rb	11.2086	11.129	11.5054	10.5575	11.4319	10.9535	11.242	10.8629	11.158	11.2703	10.9281	11.1377	10.9748	10.9859	11.1694	11.3232	11.1401	11.1164	0.226806
Zr/Y	8.74605	8.67352	8.72002	8.63036	8.64303	8.67213	8.73048	8.77235	8.83386	8.75701	8.55809	8.6942	8.69077	8.78344	8.83624	8.77368	8.67929	8.71732	0.0732997
Nb/Th	11.4247	11.1079	11.0434	11.6836	11.4169	12.5153	11.2044	11.3026	11.2032	11.333	12.3211	11.2608	11.3252	11.3868	10.9836	11.125	11.7709	11.4358	0.423313
